# Supplementary material for: Transcriptomic Responses of Rhizobium phaseoli to Root Exudates Reflect Its Capacity to Colonize Maize and Common Bean in an Intercropping System
Source: Frontiers journal article supplement (doi:10.3389/fmicb.2021.740818), 2021-10-28
Supplement: Table_1.XLS [file Table_1.XLS]

## Sheet: TableS1
Supplementary table S1. Up-regulated genes of R. phaseoli Ch24-10 in bean exudates compared to Ch24-10 in Fahraeus solution
ORF	NCBI Protein ID	Locus	Product	logFC
cds21	WP_016736932.1	Plasmid_A	amino acid synthesis family protein	4.6663
cds22	WP_016736931.1	Plasmid_A	alpha/beta hydrolase	4.21031
cds23	WP_016736930.1	Plasmid_A	flavin monooxygenase/reductase	3.16698
cds24	WP_016736929.1	Plasmid_A	LLM class flavin-dependent oxidoreductase	1.95911
cds41	WP_016736911.1	Plasmid_A	SIS domain-containing protein	1.65227
cds59	WP_016736894.1	Plasmid_A	LacI family transcriptional regulator	3.11901
cds60	WP_016736893.1	Plasmid_A	peptide ABC transporter	1.89652
cds118	WP_029532041.1	Plasmid_A	hypothetical protein	2.06016
cds122	WP_016736836.1	Plasmid_A	sn-glycerol-3-phosphate import ATP-binding protein UgpC	1.14573
cds123	WP_016736835.1	Plasmid_A	glycerophosphoryl diester phosphodiesterase	1.52256
cds150	WP_029532030.1	Plasmid_A	ABC transporter substrate-binding protein	2.46975
cds151	WP_016736811.1	Plasmid_A	ABC transporter ATP-binding protein	1.64224
cds152	WP_004677491.1	Plasmid_A	ABC transporter permease	1.42633
cds153	WP_029532026.1	Plasmid_A	dihydroxy-acid dehydratase	1.29395
cds159	WP_004674652.1	Plasmid_A	ABC transporter permease	1.02181
cds209	WP_010016978.1	Plasmid_A	carbohydrate ABC transporter permease	1.16491
cds210	WP_016737081.1	Plasmid_A	sugar ABC transporter permease	2.38126
cds211	WP_016737080.1	Plasmid_A	sugar ABC transporter substrate-binding protein	1.3933
cds212	WP_016737079.1	Plasmid_A	ABC transporter ATP-binding protein	1.30988
cds229	WP_004674667.1	Plasmid_A	formaldehyde dehydrogenase%2C glutathione-independent	1.73977
cds232	WP_016737066.1	Plasmid_A	EamA family transporter	1.65513
cds247	WP_016737051.1	Plasmid_A	alpha/beta hydrolase	1.2057
cds250	WP_016737048.1	Plasmid_A	SMP-30/gluconolactonase/LRE family protein	1.09546
cds253	WP_016737045.1	Plasmid_A	2-hydroxyacid dehydrogenase	2.66514
cds254	WP_016737044.1	Plasmid_A	KR domain-containing protein	2.42053
cds255	WP_016737043.1	Plasmid_A	gluconokinase	1.5321
cds257	WP_016737041.1	Plasmid_A	sugar ABC transporter ATP-binding protein	1.4773
cds278	WP_016737023.1	Plasmid_A	FMN-dependent monooxygenase	1.17884
cds279	WP_004670822.1	Plasmid_A	IclR family transcriptional regulator	2.63498
cds280	WP_029532110.1	Plasmid_A	ABC transporter substrate-binding protein	2.07614
cds302	WP_016737000.1	Plasmid_A	amino acid ABC transporter permease	1.23137
cds325	WP_016736977.1	Plasmid_A	hypothetical protein	1.74089
cds326	WP_004670929.1	Plasmid_A	30S ribosomal protein S21	1.57235
cds353	WP_016736659.1	Plasmid_B	potassium-transporting ATPase subunit KdpA	1.0396
cds372	WP_012490604.1	Plasmid_B	iron-hydroxamate transporter ATP-binding protein	1.0186
cds380	WP_004678031.1	Plasmid_B	DeoR/GlpR transcriptional regulator	2.10907
cds381	WP_016736680.1	Plasmid_B	bifunctional rhamnulose-1-phosphate aldolase/short-chain dehydrogenase	1.68413
cds397	WP_029531975.1	Plasmid_B	LysR family transcriptional regulator	1.56248
cds409	WP_016736701.1	Plasmid_B	bifunctional hydroxymethylpyrimidine kinase/phosphomethylpyrimidine kinase	1.47636
cds410	WP_016736702.1	Plasmid_B	thiamine phosphate synthase	1.09808
cds425	WP_016736713.1	Plasmid_B	aspartate ammonia-lyase	1.11949
cds428	WP_012490656.1	Plasmid_B	hypothetical protein	1.18678
cds430	WP_029531978.1	Plasmid_B	hypothetical protein	3.0902
cds434	WP_029531980.1	Plasmid_B	membrane protein	1.57111
cds440	WP_016736721.1	Plasmid_B	ABC transporter substrate-binding protein	1.08244
cds463	WP_039752254.1	Plasmid_B	2-deoxy-D-gluconate 3-dehydrogenase	1.2618
cds464	WP_016736741.1	Plasmid_B	5-dehydro-4-deoxy-D-glucuronate isomerase	1.67102
cds465	WP_004669789.1	Plasmid_B	DUF1127 domain-containing protein	3.12825
cds468	WP_016736744.1	Plasmid_B	aldo/keto reductase	1.20521
cds471	WP_029531995.1	Plasmid_B	septum formation inhibitor MinC	1.13133
cds472	WP_016736747.1	Plasmid_B	TetR/AcrR family transcriptional regulator	6.00969
cds473	WP_016736748.1	Plasmid_B	efflux RND transporter periplasmic adaptor subunit	5.50259
cds474	WP_046977157.1	Plasmid_B	AcrB/AcrD/AcrF family protein	2.28181
cds476	WP_016736751.1	Plasmid_B	hypothetical protein	1.2758
cds477	WP_012490702.1	Plasmid_B	oxidoreductase	5.19523
cds478	WP_012490703.1	Plasmid_B	formyltetrahydrofolate deformylase	1.66849
cds507	WP_012490730.1	Plasmid_B	nicotinate-nucleotide diphosphorylase (carboxylating)	1.29156
cds508	WP_016736774.1	Plasmid_B	L-aspartate oxidase	1.8453
cds509	WP_016736775.1	Plasmid_B	quinolinate synthase NadA	1.07346
cds521	WP_016736787.1	Plasmid_B	precorrin-2 C(20)-methyltransferase	1.26171
cds522	WP_016736788.1	Plasmid_B	precorrin-8X methylmutase	1.65139
cds566	WP_029531919.1	Plasmid_B	ubiquinol oxidase subunit II	1.66786
cds569	WP_016736513.1	Plasmid_B	hypothetical protein	2.60503
cds570	WP_016736514.1	Plasmid_B	type II toxin-antitoxin system RelE/ParE family toxin	2.31293
cds571	WP_016736515.1	Plasmid_B	hypothetical protein	1.92915
cds618	WP_016736554.1	Plasmid_B	N-formylglutamate deformylase	2.01977
cds619	WP_016736555.1	Plasmid_B	histidine ammonia-lyase	3.06121
cds620	WP_029531939.1	Plasmid_B	imidazolonepropionase	3.98478
cds621	WP_016736556.1	Plasmid_B	formimidoylglutamate deiminase	3.29548
cds622	WP_016736557.1	Plasmid_B	histidine utilization repressor	2.57069
cds623	WP_012490471.1	Plasmid_B	histidine utilization repressor	2.10538
cds624	WP_080956176.1	Plasmid_B	hypothetical protein	1.28883
cds625	WP_012490473.1	Plasmid_B	ABC transporter substrate-binding protein	2.51091
cds626	WP_016736558.1	Plasmid_B	ABC transporter permease	2.4787
cds627	WP_004674851.1	Plasmid_B	ABC transporter permease	2.18909
cds628	WP_012490476.1	Plasmid_B	histidine/lysine/arginine/ornithine ABC transporter ATP-binding protein HisP	1.64847
cds629	WP_016736559.1	Plasmid_B	histidine ammonia-lyase	1.3156
cds638	WP_016736567.1	Plasmid_B	periplasmic alpha-galactoside-binding protein	1.11594
cds688	WP_010014881.1	Plasmid_B	transcriptional regulator	1.05674
cds689	WP_016736613.1	Plasmid_B	IclR family transcriptional regulator	2.868
cds690	WP_016736614.1	Plasmid_B	3-oxoadipate CoA-transferase subunit A	1.91486
cds691	WP_016736615.1	Plasmid_B	CoA transferase subunit B	1.05993
cds724	WP_016736641.1	Plasmid_B	FadR family transcriptional regulator	1.13366
cds785	WP_004671987.1	Plasmid_C	XRE family transcriptional regulator	1.49512
cds820	WP_016737490.1	Plasmid_C	hypothetical protein	6.42978
cds821	WP_011053454.1	Plasmid_C	nodulation protein	2.74332
cds827	WP_010022281.1	Plasmid_C	hypothetical protein	3.72459
cds831	WP_010024000.1	Plasmid_C	nodulation factor ABC transporter ATP-binding protein NodI	1.45419
cds832	gbkey=CDS	Plasmid_C	hypothetical protein	1.7059
cds833	WP_011053463.1	Plasmid_C	methyltransferase domain-containing protein	2.50879
cds834	WP_011053464.1	Plasmid_C	chitooligosaccharide synthase NodC	3.18849
cds835	WP_011053465.1	Plasmid_C	chitooligosaccharide deacetylase NodB	4.4257
cds836	WP_011053466.1	Plasmid_C	hypothetical protein	6.54065
cds838	WP_010025697.1	Plasmid_C	nodulation protein NodZ	1.97028
cds872	WP_004679687.1	Plasmid_C	nodulation protein A	4.7588
cds886	WP_004677759.1	Plasmid_C	LLM class flavin-dependent oxidoreductase	1.24377
cds953	WP_077991546.1	Plasmid_C	alcohol dehydrogenase	1.11249
cds962	gbkey=CDS	Plasmid_C	hypothetical protein	1.14665
cds998	gbkey=CDS	Plasmid_C	hypothetical protein	1.41641
cds1006	WP_077991535.1	Plasmid_C	hypothetical protein	1.24626
cds1007	WP_016737410.1	Plasmid_C	hypothetical protein	2.83618
cds1008	gbkey=CDS	Plasmid_C	hypothetical protein	1.78199
cds1013	WP_008534237.1	Plasmid_C	hypothetical protein	2.20089
cds1014	WP_046977176.1	Plasmid_C	hypothetical protein	1.879
cds1015	WP_046977177.1	Plasmid_C	EscJ/YscJ/HrcJ family type III secretion inner membrane ring protein	2.70715
cds1016	WP_046977178.1	Plasmid_C	hypothetical protein	1.30735
cds1017	WP_046977179.1	Plasmid_C	HrpE/YscL family type III secretion apparatus protein	2.46954
cds1018	WP_046977180.1	Plasmid_C	FliI/YscN family ATPase	1.25094
cds1028	WP_009995183.1	Plasmid_C	hypothetical protein	1.79516
cds1032	WP_010031884.1	Plasmid_C	hypothetical protein	1.51636
cds1045	WP_011053340.1	Plasmid_C	NAD(P)-dependent oxidoreductase	1.39707
cds1064	WP_016737424.1	Plasmid_C	AraC family transcriptional regulator	1.32797
cds1076	WP_004671535.1	Plasmid_C	SDR family NAD(P)-dependent oxidoreductase	1.13828
cds1077	WP_008534378.1	Plasmid_C	flavin reductase	1.59264
cds1078	WP_008534380.1	Plasmid_C	4-carboxymuconolactone decarboxylase	1.41512
cds1088	WP_016737437.1	Plasmid_C	sugar ABC transporter substrate-binding protein	2.0255
cds1089	WP_039752580.1	Plasmid_C	sugar ABC transporter ATP-binding protein	1.11105
cds1115	WP_016737454.1	Plasmid_C	PIN domain-containing protein	1.34656
cds1116	WP_039752605.1	Plasmid_C	excisionase	1.05703
cds1196	WP_016735368.1	Plasmid_D	acyl-CoA thioesterase	1.33233
cds1210	WP_016735379.1	Plasmid_D	sugar kinase	1.59907
cds1211	WP_016735380.1	Plasmid_D	hypothetical protein	1.58128
cds1212	WP_029531719.1	Plasmid_D	NUDIX hydrolase	1.15684
cds1241	WP_029531726.1	Plasmid_D	FadR family transcriptional regulator	1.01835
cds1243	WP_016735411.1	Plasmid_D	TRAP transporter small permease	1.21606
cds1244	WP_016735412.1	Plasmid_D	TRAP transporter large permease	1.43764
cds1245	WP_016735413.1	Plasmid_D	L-idonate 5-dehydrogenase	1.64999
cds1317	WP_029531734.1	Plasmid_D	dihydrodipicolinate synthase family protein	1.87544
cds1347	WP_016735504.1	Plasmid_D	XRE family transcriptional regulator	2.1078
cds1369	WP_016735525.1	Plasmid_D	thiol reductant ABC exporter subunit CydD	1.25675
cds1370	WP_016735526.1	Plasmid_D	GbsR/MarR family transcriptional regulator	1.13223
cds1390	WP_029531741.1	Plasmid_D	gfo/Idh/MocA family oxidoreductase	2.02284
cds1391	WP_016735545.1	Plasmid_D	sugar phosphate isomerase/epimerase	1.42922
cds1404	WP_016735553.1	Plasmid_D	amidase	1.67723
cds1423	WP_016735565.1	Plasmid_D	type II toxin-antitoxin system Phd/YefM family antitoxin	1.05624
cds1424	WP_016735566.1	Plasmid_D	PIN domain-containing protein	1.6953
cds1425	gbkey=CDS	Plasmid_D	IS5/IS1182 family transposase	1.8818
cds1444	WP_016735584.1	Plasmid_D	hypothetical protein	1.84746
cds1445	WP_016735585.1	Plasmid_D	hypothetical protein	1.18029
cds1461	WP_016735600.1	Plasmid_D	DNA-binding protein	2.33597
cds1462	WP_016735601.1	Plasmid_D	hypothetical protein	2.77129
cds1465	WP_052766881.1	Plasmid_D	FAD-dependent monooxygenase	1.23858
cds1480	WP_016735617.1	Plasmid_D	hypothetical protein	1.13429
cds1554	WP_029531769.1	Plasmid_D	ABC transporter permease	1.09909
cds1555	WP_016735681.1	Plasmid_D	ABC transporter substrate-binding protein	1.18729
cds1558	WP_016735684.1	Plasmid_D	alcohol dehydrogenase	1.53454
cds1565	WP_016735690.1	Plasmid_D	ABC transporter ATP-binding protein	1.31143
cds1566	WP_004673596.1	Plasmid_D	ABC transporter ATP-binding protein	2.64781
cds1567	WP_016735691.1	Plasmid_D	glycerol-3-phosphate dehydrogenase	3.26879
cds1568	WP_016735692.1	Plasmid_D	DeoR/GlpR transcriptional regulator	1.39717
cds1569	WP_039751813.1	Plasmid_D	EamA/RhaT family transporter	1.07025
cds1570	WP_016735694.1	Plasmid_D	LysR family transcriptional regulator	1.09753
cds1577	WP_016735699.1	Plasmid_D	EmrB/QacA family drug resistance transporter	4.13503
cds1578	WP_016735700.1	Plasmid_D	HlyD family secretion protein	4.36392
cds1579	WP_029531771.1	Plasmid_D	TetR/AcrR family transcriptional regulator	3.63854
cds1580	WP_016735702.1	Plasmid_D	mannonate dehydratase	1.94717
cds1603	WP_016735725.1	Plasmid_D	ABC transporter substrate-binding protein	1.37711
cds1607	end_range=414906,.	Plasmid_D	hypothetical protein	1.15233
cds1658	WP_016735773.1	Plasmid_D	mandelate racemase/muconate lactonizing enzyme family protein	1.35388
cds1659	WP_016735774.1	Plasmid_D	ABC transporter ATP-binding protein	1.12248
cds1660	WP_016735775.1	Plasmid_D	ABC transporter permease	1.01197
cds1661	WP_016735776.1	Plasmid_D	ABC transporter permease	1.1585
cds1663	WP_012489932.1	Plasmid_D	FadR family transcriptional regulator	2.39293
cds1664	WP_016735778.1	Plasmid_D	NAD(P)-dependent oxidoreductase	1.36637
cds1665	WP_016735779.1	Plasmid_D	SMP-30/gluconolactonase/LRE family protein	1.30788
cds1718	WP_016735829.1	Plasmid_D	AcrB/AcrD/AcrF family protein	1.18999
cds1719	WP_016735830.1	Plasmid_D	efflux RND transporter periplasmic adaptor subunit	3.06235
cds1720	WP_016735831.1	Plasmid_D	efflux RND transporter periplasmic adaptor subunit	3.94811
cds1721	WP_029531790.1	Plasmid_D	TetR/AcrR family transcriptional regulator	2.27927
cds1722	WP_029531791.1	Plasmid_D	LacI family transcriptional regulator	1.84869
cds1731	WP_016735843.1	Plasmid_D	carbohydrate ABC transporter substrate-binding protein	1.37406
cds1733	WP_016735844.1	Plasmid_D	DUF3422 domain-containing protein	1.23031
cds1740	WP_004677397.1	Plasmid_D	LacI family transcriptional regulator	1.36199
cds1743	WP_004677391.1	Plasmid_D	FadR family transcriptional regulator	1.77155
cds1749	WP_016735856.1	Plasmid_D	carbohydrate-binding protein	1.25822
cds1750	WP_016735857.1	Plasmid_D	heparinase	3.41117
cds1751	WP_016735858.1	Plasmid_D	sugar ABC transporter permease	3.76132
cds1752	WP_016735859.1	Plasmid_D	carbohydrate ABC transporter permease	1.74245
cds1753	WP_016735860.1	Plasmid_D	glucoronyl hydrolase	2.28938
cds1754	WP_016735861.1	Plasmid_D	ABC transporter ATP-binding protein	1.07472
cds1794	WP_016735897.1	Plasmid_D	ABC transporter permease	1.01899
cds1822	WP_012490080.1	Plasmid_D	ABC transporter substrate-binding protein	1.20906
cds1823	WP_012490081.1	Plasmid_D	ABC transporter permease	1.18739
cds1829	WP_016735926.1	Plasmid_D	oxidoreductase	1.64692
cds1840	gbkey=CDS	Plasmid_D	capsule biosynthesis protein	1.09517
cds1856	WP_016735951.1	Plasmid_D	hypothetical protein	1.18105
cds1890	WP_016735983.1	Plasmid_D	beta-glucosidase	1.13339
cds1891	WP_010020762.1	Plasmid_D	TetR/AcrR family transcriptional regulator	1.74985
cds1892	WP_016735984.1	Plasmid_D	hypothetical protein	1.22345
cds1923	WP_016736009.1	Plasmid_D	amino acid ABC transporter ATP-binding protein	1.73797
cds1924	WP_004669259.1	Plasmid_D	amino acid ABC transporter permease	1.79746
cds1925	WP_016736010.1	Plasmid_D	amino acid ABC transporter permease	2.066
cds1934	WP_016736015.1	Plasmid_D	TetR/AcrR family transcriptional regulator	1.32639
cds1980	WP_010004393.1	Plasmid_D	hypothetical protein	1.66929
cds1981	WP_016736056.1	Plasmid_D	PIN domain-containing protein	1.22261
cds1987	gbkey=CDS	Plasmid_D	hypothetical protein	1.72161
cds2021	gbkey=CDS	Plasmid_D	IS5/IS1182 family transposase	1.55073
cds2029	end_range=859902,.	Plasmid_D	hypothetical protein	1.45503
cds2032	end_range=861851,.	Plasmid_D	hypothetical protein	1.48017
cds2033	WP_029531829.1	Plasmid_D	cold-shock protein	1.29221
cds2034	WP_011428437.1	Plasmid_D	hypothetical protein	1.15754
cds2036	WP_016736098.1	Plasmid_D	hypothetical protein	1.76111
cds2037	WP_080956208.1	Plasmid_D	hypothetical protein	2.04361
cds2055	WP_016736110.1	Plasmid_D	curlin	1.0852
cds2061	WP_016737599.1	Plasmid_D	cold-shock protein	1.47173
cds2086	WP_080956210.1	Plasmid_D	TetR/AcrR family transcriptional regulator	1.42552
cds2107	WP_016736157.1	Plasmid_D	cold-shock protein	1.94702
cds2108	WP_016736158.1	Plasmid_D	hypothetical protein	2.11491
cds2109	WP_016736159.1	Plasmid_D	hypothetical protein	1.17479
cds2110	WP_016736160.1	Plasmid_D	hypothetical protein	1.42234
cds2195	WP_080956220.1	Plasmid_D	cysteine hydrolase	1.10701
cds2204	WP_016735300.1	Plasmid_D	ABC transporter substrate-binding protein	1.32918
cds2205	WP_016735301.1	Plasmid_D	ABC transporter ATP-binding protein	2.00317
cds2206	WP_016735302.1	Plasmid_D	ABC transporter ATP-binding protein	2.05595
cds2207	WP_016735303.1	Plasmid_D	branched-chain amino acid ABC transporter permease	1.41145
cds2209	WP_029531706.1	Plasmid_D	3-alpha-hydroxysteroid dehydrogenase	1.35053
cds2210	WP_016735306.1	Plasmid_D	salicylaldehyde dehydrogenase	1.1711
cds2241	WP_016735333.1	Plasmid_D	transcriptional regulator NanR	1.09755
cds2242	WP_029531708.1	Plasmid_D	ribulose 1%2C5-bisphosphate carboxylase	2.46036
cds2243	WP_029531709.1	Plasmid_D	four-carbon acid sugar kinase family protein	1.25405
cds2244	WP_016735336.1	Plasmid_D	triose-phosphate isomerase	1.79675
cds2245	WP_004678734.1	Plasmid_D	ribose 5-phosphate isomerase B	2.98399
cds2246	WP_004678736.1	Plasmid_D	semialdehyde dehydrogenase	1.75459
cds2249	WP_004678740.1	Plasmid_D	sugar ABC transporter ATP-binding protein	1.01774
cds2264	WP_016735349.1	Plasmid_D	ROK family transcriptional regulator	1.0714
cds2265	WP_029531713.1	Plasmid_D	sugar phosphate isomerase/epimerase	1.20297
cds2266	WP_016735351.1	Plasmid_D	ABC transporter ATP-binding protein	1.34792
cds2267	WP_016735352.1	Plasmid_D	plasmid partitioning protein RepA	1.20007
cds2278	WP_080956221.1	Plasmid_D	hypothetical protein	1.22995
cds2365	WP_016734081.1	Chromosome	hypothetical protein	1.2409
cds2366	WP_016734080.1	Chromosome	hypothetical protein	1.35074
cds2373	WP_016734077.1	Chromosome	ROK family transcriptional regulator	1.02902
cds2390	WP_009998001.1	Chromosome	30S ribosomal protein S9	2.72042
cds2391	WP_008521951.1	Chromosome	50S ribosomal protein L13	3.38827
cds2423	WP_008521906.1	Chromosome	NADH-quinone oxidoreductase subunit A	1.25795
cds2427	WP_004680054.1	Chromosome	hypothetical protein	1.06512
cds2431	WP_016734044.1	Chromosome	NADH-quinone oxidoreductase subunit G	1.10826
cds2441	WP_016734037.1	Chromosome	methylmalonyl-CoA epimerase	1.02823
cds2442	WP_029531512.1	Chromosome	DUF1467 domain-containing protein	1.16903
cds2455	WP_003587245.1	Chromosome	50S ribosomal protein L33	2.75835
cds2463	WP_016734020.1	Chromosome	aspartate carbamoyltransferase	1.58533
cds2468	WP_016734016.1	Chromosome	penicillin-binding protein 1A	1.12425
cds2480	WP_003573826.1	Chromosome	preprotein translocase subunit SecE	2.18273
cds2481	WP_004669067.1	Chromosome	transcription termination/antitermination protein NusG	1.86011
cds2482	WP_004669070.1	Chromosome	50S ribosomal protein L11	1.63978
cds2483	WP_004669072.1	Chromosome	50S ribosomal protein L1	1.51869
cds2484	WP_037113092.1	Chromosome	50S ribosomal protein L10	1.02116
cds2489	WP_003547537.1	Chromosome	30S ribosomal protein S12	5.04184
cds2490	WP_004669085.1	Chromosome	30S ribosomal protein S7	4.12091
cds2491	WP_038688280.1	Chromosome	elongation factor G	2.76625
cds2493	WP_003547547.1	Chromosome	30S ribosomal protein S10	2.9728
cds2494	WP_016734008.1	Chromosome	50S ribosomal protein L3	2.35292
cds2495	WP_004674918.1	Chromosome	50S ribosomal protein L4	1.91098
cds2496	WP_003547550.1	Chromosome	50S ribosomal protein L23	1.83365
cds2497	WP_009986456.1	Chromosome	50S ribosomal protein L2	1.56431
cds2498	WP_003573797.1	Chromosome	30S ribosomal protein S19	1.25679
cds2499	WP_004674922.1	Chromosome	50S ribosomal protein L22	1.19335
cds2504	WP_003573790.1	Chromosome	50S ribosomal protein L14	3.26937
cds2505	WP_004674929.1	Chromosome	50S ribosomal protein L24	2.69549
cds2506	WP_016734007.1	Chromosome	50S ribosomal protein L5	1.96699
cds2507	WP_003573787.1	Chromosome	30S ribosomal protein S14	1.83764
cds2508	WP_003547562.1	Chromosome	30S ribosomal protein S8	1.59574
cds2509	WP_003578670.1	Chromosome	50S ribosomal protein L6	1.40728
cds2510	WP_003573785.1	Chromosome	50S ribosomal protein L18	1.1714
cds2511	WP_003573784.1	Chromosome	30S ribosomal protein S5	1.00746
cds2516	WP_003573772.1	Chromosome	30S ribosomal protein S13	2.76321
cds2517	WP_003547577.1	Chromosome	30S ribosomal protein S11	1.80983
cds2518	WP_003547579.1	Chromosome	DNA-directed RNA polymerase subunit alpha	1.3715
cds2570	WP_016732818.1	Chromosome	homogentisate 1%2C2-dioxygenase	1.70733
cds2571	WP_016732819.1	Chromosome	FAA hydrolase family protein	1.80597
cds2572	WP_016732820.1	Chromosome	maleylacetoacetate isomerase	1.46397
cds2573	WP_012483534.1	Chromosome	MEKHLA domain-containing protein	1.36751
cds2591	WP_012483551.1	Chromosome	3-oxoacyl-ACP reductase	2.79768
cds2592	WP_012483552.1	Chromosome	TetR/AcrR family transcriptional regulator	4.54301
cds2593	WP_012483553.1	Chromosome	FMN-dependent NADH-azoreductase	1.35941
cds2599	WP_016732838.1	Chromosome	alanine dehydrogenase	2.22878
cds2600	WP_016732839.1	Chromosome	DUF1203 domain-containing protein	3.07124
cds2618	WP_012483575.1	Chromosome	ANTAR domain-containing protein	1.23721
cds2630	WP_037113865.1	Chromosome	hypothetical protein	1.85296
cds2646	WP_016732877.1	Chromosome	hypothetical protein	1.12928
cds2654	WP_016732886.1	Chromosome	sel1 repeat family protein	1.17052
cds2655	WP_012483593.1	Chromosome	exodeoxyribonuclease III	1.04648
cds2671	WP_004678848.1	Chromosome	preprotein translocase subunit YajC	1.33463
cds2676	WP_016732903.1	Chromosome	FADH(2)-oxidizing methylenetetrahydrofolate--tRNA-(uracil(54)-C(5))-methyltransferase TrmFO	1.51266
cds2677	WP_004678841.1	Chromosome	DUF1127 domain-containing protein	2.16675
cds2678	WP_004678838.1	Chromosome	DUF1127 domain-containing protein	2.4043
cds2681	WP_004678834.1	Chromosome	trigger factor	2.21531
cds2705	WP_004671258.1	Chromosome	NADH:ubiquinone oxidoreductase subunit NDUFA12	1.08107
cds2706	WP_016732913.1	Chromosome	DUF2155 domain-containing protein	1.06212
cds2720	WP_016732925.1	Chromosome	single-stranded-DNA-specific exonuclease RecJ	1.08339
cds2755	gbkey=CDS	Chromosome	hypothetical protein	1.02292
cds2758	WP_008526906.1	Chromosome	30S ribosomal protein S2	2.8845
cds2759	WP_009994369.1	Chromosome	elongation factor Ts	1.89425
cds2778	WP_012483684.1	Chromosome	pyruvate dehydrogenase (acetyl-transferring) E1 component subunit alpha	1.72695
cds2791	WP_016732968.1	Chromosome	bifunctional 2-C-methyl-D-erythritol 4-phosphate cytidylyltransferase/2-C-methyl-D-erythritol 2%2C4-cyclodiphosphate synthase	1.27755
cds2816	WP_046977061.1	Chromosome	nucleoside triphosphate pyrophosphohydrolase	1.15588
cds2818	WP_029531170.1	Chromosome	uroporphyrinogen-III C-methyltransferase	1.27893
cds2819	WP_003579112.1	Chromosome	DUF2849 domain-containing protein	1.01867
cds2820	WP_016732974.1	Chromosome	nitrite/sulfite reductase	1.09323
cds2823	WP_016732977.1	Chromosome	AEC family transporter	1.29542
cds2832	end_range=532190,.	Chromosome	hypothetical protein	1.42029
cds2833	gbkey=CDS	Chromosome	LysR family transcriptional regulator	1.41414
cds2834	WP_016732989.1	Chromosome	ABC transporter ATP-binding protein	1.16811
cds2839	WP_016732994.1	Chromosome	hypothetical protein	1.30793
cds2841	WP_016732996.1	Chromosome	MarR family transcriptional regulator	1.59235
cds2844	WP_016732999.1	Chromosome	gfo/Idh/MocA family oxidoreductase	1.55607
cds2845	WP_012483744.1	Chromosome	ROK family transcriptional regulator	1.0439
cds2847	WP_016733002.1	Chromosome	sugar ABC transporter permease	1.13493
cds2848	WP_004673807.1	Chromosome	carbohydrate ABC transporter permease	1.42036
cds2849	WP_046977064.1	Chromosome	ABC transporter ATP-binding protein	1.31392
cds2850	gbkey=CDS	Chromosome	5-dehydro-4-deoxyglucarate dehydratase	2.21865
cds2851	WP_012483749.1	Chromosome	mannonate dehydratase	2.02095
cds2853	WP_016733006.1	Chromosome	ABC transporter substrate-binding protein	1.863
cds2854	WP_012483752.1	Chromosome	ABC transporter permease	1.97183
cds2855	WP_016733007.1	Chromosome	ABC transporter permease	1.10512
cds2868	WP_016733018.1	Chromosome	GFA family protein	1.19715
cds2877	WP_004673781.1	Chromosome	ABC transporter permease	1.01088
cds2880	WP_004673778.1	Chromosome	sugar ABC transporter substrate-binding protein	2.93802
cds2881	WP_020465354.1	Chromosome	sugar ABC transporter ATP-binding protein	2.1188
cds2886	WP_016733030.1	Chromosome	glutamine--fructose-6-phosphate transaminase (isomerizing)	1.29749
cds2889	WP_004680228.1	Chromosome	succinate dehydrogenase assembly factor 2 family protein	1.72889
cds2896	WP_004680220.1	Chromosome	invasion associated locus B family protein	1.06418
cds2907	WP_016733043.1	Chromosome	hypothetical protein	1.57797
cds2908	WP_004671912.1	Chromosome	pantetheine-phosphate adenylyltransferase	1.98785
cds2915	WP_016733047.1	Chromosome	beta-ketoacyl-[acyl-carrier-protein] synthase II	1.12584
cds2916	WP_029531198.1	Chromosome	transcriptional regulator	3.26176
cds2943	WP_016733074.1	Chromosome	agmatinase	1.03618
cds2959	WP_004671683.1	Chromosome	membrane protein	1.5052
cds2962	WP_016733090.1	Chromosome	methionine--tRNA ligase	1.10309
cds2969	WP_016733097.1	Chromosome	RidA family protein	1.40168
cds2985	WP_016733108.1	Chromosome	ATP-dependent helicase	2.45119
cds2989	WP_016733112.1	Chromosome	citrate synthase/methylcitrate synthase	4.19042
cds2990	WP_016733113.1	Chromosome	CTP synthase	1.17589
cds2991	WP_016733114.1	Chromosome	preprotein translocase subunit SecG	2.09227
cds2996	WP_004674119.1	Chromosome	hypothetical protein	2.00724
cds3019	WP_016734499.1	Chromosome	SulP family inorganic anion transporter	1.57343
cds3020	WP_010058543.1	Chromosome	carbonic anhydrase	1.64462
cds3027	WP_016734492.1	Chromosome	cytochrome c	1.18962
cds3028	WP_016734491.1	Chromosome	LpqC%2C poly	1.97232
cds3062	WP_080956154.1	Chromosome	hypothetical protein	1.74156
cds3063	WP_004669522.1	Chromosome	4-oxalocrotonate tautomerase	1.29282
cds3071	WP_012483072.1	Chromosome	hypothetical protein	1.07933
cds3076	WP_046977107.1	Chromosome	betaine-aldehyde dehydrogenase	1.3282
cds3077	WP_012483077.1	Chromosome	transcriptional regulator BetI	2.31353
cds3080	WP_016734459.1	Chromosome	CBS domain-containing protein	1.7872
cds3084	WP_016734456.1	Chromosome	transcriptional regulator	1.19627
cds3085	WP_016734455.1	Chromosome	MFS transporter	1.2464
cds3112	WP_004676036.1	Chromosome	cold-shock protein	1.68707
cds3113	WP_016734430.1	Chromosome	hypothetical protein	1.77091
cds3114	WP_016734429.1	Chromosome	30S ribosomal protein S21	1.27762
cds3118	WP_029531569.1	Chromosome	MarR family transcriptional regulator	1.10108
cds3124	WP_016734422.1	Chromosome	ABC transporter ATP-binding protein	1.28428
cds3143	WP_016734409.1	Chromosome	ammonia-dependent NAD(+) synthetase	1.11607
cds3144	WP_029531567.1	Chromosome	glutathione S-transferase	2.96709
cds3145	WP_010025457.1	Chromosome	TetR/AcrR family transcriptional regulator	2.90461
cds3176	WP_016734385.1	Chromosome	N-acetyltransferase	1.02627
cds3211	WP_016734358.1	Chromosome	fatty acid desaturase	1.24597
cds3217	WP_016734352.1	Chromosome	DUF983 domain-containing protein	2.4754
cds3218	WP_016734351.1	Chromosome	LysR family transcriptional regulator	3.1481
cds3225	WP_016734345.1	Chromosome	MFS transporter	1.44736
cds3226	WP_004670343.1	Chromosome	hypothetical protein	1.56595
cds3230	WP_016734344.1	Chromosome	c-type cytochrome biogenesis protein CcmI	1.08532
cds3244	WP_010035016.1	Chromosome	hypothetical protein	3.95613
cds3254	WP_039751042.1	Chromosome	Lrp/AsnC family transcriptional regulator	1.14472
cds3256	WP_012483227.1	Chromosome	MFS transporter	1.28875
cds3265	WP_016734320.1	Chromosome	membrane protein	1.55345
cds3272	WP_010009317.1	Chromosome	hypothetical protein	1.50673
cds3285	WP_016734306.1	Chromosome	DUF1127 domain-containing protein	1.01185
cds3299	WP_003574261.1	Chromosome	DNA-directed RNA polymerase subunit omega	1.48947
cds3301	WP_004675049.1	Chromosome	DUF3563 domain-containing protein	4.42069
cds3302	WP_012483260.1	Chromosome	DUF2062 domain-containing protein	3.11754
cds3306	WP_016734296.1	Chromosome	GTPase Era	1.04574
cds3312	WP_029531551.1	Chromosome	HD domain-containing protein	1.36872
cds3335	WP_016734272.1	Chromosome	hypothetical protein	2.35649
cds3336	WP_016734271.1	Chromosome	EamA family transporter RarD	1.49699
cds3341	WP_016734266.1	Chromosome	GFA family protein	1.17773
cds3342	WP_016734265.1	Chromosome	hypothetical protein	1.12681
cds3343	WP_016734264.1	Chromosome	cysteine--tRNA ligase	1.81282
cds3349	WP_029531548.1	Chromosome	LysE family translocator	1.07099
cds3350	WP_016734257.1	Chromosome	alanine racemase	1.09294
cds3352	WP_016734256.1	Chromosome	50S ribosomal protein L9	1.41256
cds3354	WP_004680498.1	Chromosome	30S ribosomal protein S18	2.6196
cds3355	WP_004680499.1	Chromosome	30S ribosomal protein S6	3.52312
cds3358	WP_016734253.1	Chromosome	[acyl-carrier-protein] S-malonyltransferase	1.07831
cds3384	WP_029531544.1	Chromosome	ABC transporter ATP-binding protein	1.09434
cds3388	WP_004680549.1	Chromosome	nucleoside-diphosphate kinase	1.75228
cds3389	WP_016734230.1	Chromosome	hypothetical protein	1.56595
cds3390	WP_016734229.1	Chromosome	hypothetical protein	2.36474
cds3391	WP_046977115.1	Chromosome	branched-chain amino acid ABC transporter permease	1.29259
cds3401	WP_046977116.1	Chromosome	molybdopterin oxidoreductase family protein	1.30388
cds3402	WP_012483336.1	Chromosome	NUDIX domain-containing protein	1.24023
cds3403	WP_029531540.1	Chromosome	alpha-D-ribose 1-methylphosphonate 5-triphosphate diphosphatase	1.08895
cds3404	WP_016734217.1	Chromosome	phosphoribosylglycinamide formyltransferase	1.40757
cds3405	WP_016734216.1	Chromosome	phosphoribosylformylglycinamidine cyclo-ligase	1.73921
cds3409	WP_004673739.1	Chromosome	exopolyphosphatase	1.01926
cds3415	WP_029531536.1	Chromosome	aspartate--tRNA ligase	2.16678
cds3423	WP_016734203.1	Chromosome	EamA/RhaT family transporter	1.48001
cds3426	WP_016734201.1	Chromosome	porphobilinogen synthase	1.33451
cds3441	WP_012483354.1	Chromosome	serine hydroxymethyltransferase	1.08983
cds3458	WP_004674116.1	Chromosome	6%2C7-dimethyl-8-ribityllumazine synthase	1.24007
cds3475	WP_080956159.1	Chromosome	N-acetyltransferase	1.06364
cds3484	WP_046977121.1	Chromosome	2-isopropylmalate synthase	1.71779
cds3521	WP_080515661.1	Chromosome	sugar kinase	1.14025
cds3527	WP_012484718.1	Chromosome	MarR family transcriptional regulator	1.56181
cds3529	WP_016733755.1	Chromosome	membrane protein	2.02808
cds3531	WP_016733756.1	Chromosome	polysaccharide deacetylase	1.16277
cds3534	WP_012484723.1	Chromosome	PadR family transcriptional regulator	4.06168
cds3535	WP_029531442.1	Chromosome	hypothetical protein	1.60593
cds3547	WP_012484733.1	Chromosome	hypothetical protein	1.19216
cds3558	WP_016733781.1	Chromosome	hypothetical protein	1.08422
cds3569	WP_016733789.1	Chromosome	5-methylaminomethyl-2-thiouridine methyltransferase	1.17572
cds3576	WP_029531450.1	Chromosome	RNA helicase	2.50513
cds3583	WP_012484826.1	Chromosome	dihydroxy-acid dehydratase	1.1836
cds3584	WP_016733800.1	Chromosome	aldehyde dehydrogenase family protein	1.16767
cds3585	WP_012484827.1	Chromosome	hypothetical protein	1.10289
cds3591	WP_016733803.1	Chromosome	hypothetical protein	1.31289
cds3592	WP_016733804.1	Chromosome	inositol 2-dehydrogenase	1.18191
cds3622	WP_011426430.1	Chromosome	UDP-glucose 4-epimerase	1.69563
cds3623	WP_016733829.1	Chromosome	glycosyl transferase	1.71547
cds3686	WP_046977124.1	Chromosome	glutamine amidotransferase	1.43011
cds3687	WP_016733877.1	Chromosome	multidrug transporter	1.19763
cds3696	WP_012484941.1	Chromosome	hypothetical protein	1.06974
cds3708	WP_016733890.1	Chromosome	FAD-binding protein	1.95721
cds3709	WP_016733891.1	Chromosome	NAD-dependent dihydropyrimidine dehydrogenase subunit PreA	3.17406
cds3710	WP_080956157.1	Chromosome	hypothetical protein	3.02248
cds3736	WP_029531484.1	Chromosome	Zn-dependent hydrolase	1.33968
cds3737	WP_016733917.1	Chromosome	DUF559 domain-containing protein	2.52221
cds3738	WP_016733918.1	Chromosome	dihydropyrimidinase	2.91088
cds3740	WP_004673032.1	Chromosome	ABC transporter ATP-binding protein	2.12548
cds3741	WP_016733919.1	Chromosome	ABC transporter permease	1.12533
cds3767	WP_004675671.1	Chromosome	branched-chain amino acid ABC transporter substrate-binding protein	1.3439
cds3768	WP_004675675.1	Chromosome	hypothetical protein	1.22831
cds3769	WP_037116131.1	Chromosome	ABC transporter ATP-binding protein	1.58
cds3770	WP_004675679.1	Chromosome	ABC transporter ATP-binding protein	1.30423
cds3776	WP_016733935.1	Chromosome	hypothetical protein	1.37409
cds3787	WP_004675735.1	Chromosome	hypothetical protein	1.9114
cds3788	WP_029531492.1	Chromosome	RluA family pseudouridine synthase	1.09635
cds3789	WP_012484996.1	Chromosome	RNA polymerase sigma factor RpoH	1.13628
cds3796	WP_016733946.1	Chromosome	multidrug efflux RND transporter permease subunit	1.09885
cds3797	WP_004675748.1	Chromosome	MexE family multidrug efflux RND transporter periplasmic adaptor subunit	1.79626
cds3798	WP_029531493.1	Chromosome	alpha/beta hydrolase	2.15633
cds3805	WP_016733952.1	Chromosome	HlyD family secretion protein	1.90659
cds3806	WP_016733953.1	Chromosome	MarR family transcriptional regulator	3.05045
cds3811	WP_016733957.1	Chromosome	monooxygenase	1.04231
cds3821	WP_016733963.1	Chromosome	sugar kinase	1.70817
cds3822	WP_029531495.1	Chromosome	ABC transporter substrate-binding protein	1.1547
cds3823	WP_016733965.1	Chromosome	sugar ABC transporter permease	1.5338
cds3824	WP_011426608.1	Chromosome	carbohydrate ABC transporter permease	1.08617
cds3825	WP_016733966.1	Chromosome	SIS domain-containing protein	1.12984
cds3830	WP_016733971.1	Chromosome	monovalent cation/H+ antiporter subunit D family protein	1.19554
cds3837	WP_012485039.1	Chromosome	NADH-quinone oxidoreductase subunit C 2	1.32485
cds3852	WP_016737122.1	Chromosome	phosphoribosyltransferase	1.07683
cds3856	WP_012485052.1	Chromosome	efflux RND transporter periplasmic adaptor subunit	1.29367
cds3857	WP_016737126.1	Chromosome	multidrug efflux RND transporter permease subunit	1.10568
cds3858	WP_016737127.1	Chromosome	nodulation protein NodT	1.01671
cds3859	WP_016737128.1	Chromosome	LacI family transcriptional regulator	1.56678
cds3860	WP_016737129.1	Chromosome	ABC transporter substrate-binding protein	1.28634
cds3866	WP_016737135.1	Chromosome	amidohydrolase	1.86429
cds3867	WP_016737136.1	Chromosome	tripartite tricarboxylate transporter permease	3.06981
cds3868	WP_004672369.1	Chromosome	tripartite tricarboxylate transporter TctB family protein	2.40105
cds3869	WP_016737137.1	Chromosome	hypothetical protein	1.11872
cds3882	WP_016737146.1	Chromosome	4-hydroxybenzoate 3-monooxygenase	2.04254
cds3891	WP_016737156.1	Chromosome	phosphoglycerate dehydrogenase	1.35148
cds3892	WP_016737157.1	Chromosome	phosphoserine transaminase	1.93948
cds3894	WP_012485090.1	Chromosome	phosphoglucosamine mutase	1.21127
cds3904	WP_004671619.1	Chromosome	tol-pal system-associated acyl-CoA thioesterase	1.07837
cds3912	WP_012485106.1	Chromosome	YebC/PmpR family DNA-binding transcriptional regulator	1.12578
cds3917	WP_012485109.1	Chromosome	PIN domain-containing protein	1.09093
cds3946	WP_003566413.1	Chromosome	50S ribosomal protein L31	3.23
cds3954	WP_012485142.1	Chromosome	inositol monophosphatase	2.81127
cds3962	gbkey=CDS	Chromosome	chemotaxis protein	1.00193
cds3975	WP_010028538.1	Chromosome	DUF465 domain-containing protein	1.67663
cds3978	WP_003582204.1	Chromosome	50S ribosomal protein L36	2.97782
cds3988	WP_012485171.1	Chromosome	pyruvate kinase	1.04821
cds3992	WP_003585771.1	Chromosome	DUF2312 domain-containing protein	1.70567
cds4000	WP_016737223.1	Chromosome	homospermidine synthase	1.2045
cds4015	gbkey=CDS	Chromosome	hypothetical protein	1.39236
cds4016	WP_012484605.1	Chromosome	hypothetical protein	1.61981
cds4018	WP_012484607.1	Chromosome	carbamoyl-phosphate synthase small subunit	1.55325
cds4023	WP_012484610.1	Chromosome	MATE family efflux transporter	1.12771
cds4029	WP_016733674.1	Chromosome	carbamoyl-phosphate synthase large subunit	1.85979
cds4032	WP_004672775.1	Chromosome	transcription elongation factor GreA	1.14387
cds4033	WP_029531415.1	Chromosome	glycosyltransferase family 1 protein	1.07183
cds4034	WP_012484619.1	Chromosome	C4-dicarboxylate transporter	3.06532
cds4037	WP_029531418.1	Chromosome	Lrp/AsnC family transcriptional regulator	1.89315
cds4040	WP_029531419.1	Chromosome	transcriptional regulator	1.89854
cds4049	WP_029531422.1	Chromosome	galactosyltransferase	1.3009
cds4050	WP_012484631.1	Chromosome	pyridoxal phosphate-dependent aminotransferase	1.18304
cds4076	WP_004680140.1	Chromosome	ribose-phosphate pyrophosphokinase	1.43727
cds4078	WP_012484653.1	Chromosome	50S ribosomal protein L25	1.18354
cds4081	WP_016733709.1	Chromosome	aminoacyl-tRNA hydrolase	1.02672
cds4084	WP_010031314.1	Chromosome	redox-regulated ATPase YchF	1.05505
cds4091	WP_012484665.1	Chromosome	ubiquinol-cytochrome c reductase iron-sulfur subunit	1.29483
cds4094	WP_012484668.1	Chromosome	CopG family transcriptional regulator	1.10473
cds4096	WP_012484670.1	Chromosome	tRNA (cytidine(34)-2'-O)-methyltransferase	1.0062
cds4117	WP_016733591.1	Chromosome	50S ribosomal protein L11 methyltransferase	1.1348
cds4128	WP_004668803.1	Chromosome	UDP-3-O-acyl-N-acetylglucosamine deacetylase	1.90157
cds4149	WP_029531397.1	Chromosome	N-acetylmuramoyl-L-alanine amidase	1.19778
cds4162	WP_016733612.1	Chromosome	methylenetetrahydrofolate reductase [NAD(P)H]	2.75983
cds4163	WP_012484523.1	Chromosome	methyltransferase domain-containing protein	1.70283
cds4172	WP_016733618.1	Chromosome	DUF4432 domain-containing protein	1.34821
cds4179	WP_016733622.1	Chromosome	N-formylglutamate amidohydrolase	1.61196
cds4181	WP_012484539.1	Chromosome	iron ABC transporter substrate-binding protein	1.02986
cds4184	WP_012484540.1	Chromosome	ABC transporter ATP-binding protein	1.11613
cds4185	WP_012484541.1	Chromosome	ABC transporter ATP-binding protein	3.32883
cds4186	WP_012484542.1	Chromosome	gfo/Idh/MocA family oxidoreductase	3.77981
cds4187	WP_012484543.1	Chromosome	carbohydrate ABC transporter permease	2.96364
cds4188	WP_016733625.1	Chromosome	sugar ABC transporter permease	2.6481
cds4189	WP_016733626.1	Chromosome	carbohydrate ABC transporter substrate-binding protein	2.71918
cds4190	WP_016733627.1	Chromosome	hypothetical protein	2.97479
cds4191	WP_016733628.1	Chromosome	N-acetylglucosamine kinase	3.19303
cds4192	WP_016733629.1	Chromosome	GntR family transcriptional regulator	2.01844
cds4195	WP_029531404.1	Chromosome	methionine synthase	2.7521
cds4216	WP_016733643.1	Chromosome	hypothetical protein	2.36484
cds4229	WP_029531410.1	Chromosome	YjbQ family protein	1.02972
cds4239	WP_012484386.1	Chromosome	chromate transporter	1.0076
cds4242	WP_029531372.1	Chromosome	hypothetical protein	1.11719
cds4255	WP_016733518.1	Chromosome	PLP-dependent aminotransferase family protein	1.56298
cds4271	WP_016733533.1	Chromosome	ABC transporter permease	1.04442
cds4272	WP_039750664.1	Chromosome	glycerol-3-phosphate transporter permease	1.86428
cds4273	WP_016733534.1	Chromosome	ABC transporter substrate-binding protein	2.10321
cds4274	WP_016733535.1	Chromosome	sn-glycerol-3-phosphate import ATP-binding protein UgpC	2.04842
cds4275	WP_016733536.1	Chromosome	sugar-binding transcriptional regulator	1.51188
cds4282	WP_016733540.1	Chromosome	NAD(P)/FAD-dependent oxidoreductase	1.22807
cds4286	WP_016733543.1	Chromosome	aspartate/glutamate racemase family protein	3.50075
cds4287	WP_016733544.1	Chromosome	GNAT family N-acetyltransferase	3.97879
cds4288	WP_016733545.1	Chromosome	TetR/AcrR family transcriptional regulator	1.99947
cds4312	WP_016733560.1	Chromosome	acetolactate synthase 3 large subunit	1.6127
cds4318	WP_016733565.1	Chromosome	phosphoserine phosphatase SerB	1.02116
cds4332	WP_010023406.1	Chromosome	ArsR family transcriptional regulator	1.27687
cds4348	WP_016733580.1	Chromosome	VOC family protein	1.03096
cds4381	WP_012484239.1	Chromosome	transcriptional regulator	1.05556
cds4403	WP_029531341.1	Chromosome	4-hydroxy-tetrahydrodipicolinate reductase	1.22268
cds4418	WP_010024558.1	Chromosome	hypothetical protein	3.49985
cds4419	WP_012484275.1	Chromosome	hypothetical protein	2.51326
cds4434	WP_029531346.1	Chromosome	metal-dependent hydrolase	1.51724
cds4514	WP_016733488.1	Chromosome	TetR/AcrR family transcriptional regulator	1.03858
cds4517	WP_016733492.1	Chromosome	nucleotidyltransferase domain-containing protein	1.29759
cds4523	WP_046977141.1	Chromosome	hypothetical protein	1.03632
cds4526	WP_012484378.1	Chromosome	zinc ABC transporter permease	1.40258
cds4527	WP_016733499.1	Chromosome	metal ABC transporter ATP-binding protein	2.06335
cds4532	gbkey=CDS	Chromosome	cobaltochelatase subunit CobN	1.36789
cds4575	WP_016733359.1	Chromosome	NUDIX domain-containing protein	1.04635
cds4586	WP_004672825.1	Chromosome	membrane protein	1.43307
cds4597	WP_004677801.1	Chromosome	glutamate synthase subunit beta	1.26883
cds4598	WP_016737236.1	Chromosome	glutamate synthase large subunit	1.77475
cds4601	WP_016737238.1	Chromosome	bile acid:sodium symporter	2.12608
cds4607	WP_020465417.1	Chromosome	hypothetical protein	2.23614
cds4614	WP_029532212.1	Chromosome	DUF475 domain-containing protein	1.39329
cds4627	WP_016737254.1	Chromosome	hypothetical protein	1.11452
cds4645	WP_003585885.1	Chromosome	30S ribosomal protein S21	2.21832
cds4653	WP_029532228.1	Chromosome	hypothetical protein	1.03523
cds4676	WP_016737294.1	Chromosome	ketohydroxyglutarate aldolase	1.26312
cds4679	WP_029532244.1	Chromosome	rhodanese domain-containing protein	1.68479
cds4687	WP_016737300.1	Chromosome	sugar ABC transporter ATP-binding protein	1.03753
cds4692	WP_016737305.1	Chromosome	MFS transporter	1.74956
cds4693	WP_012485276.1	Chromosome	HlyD family secretion protein	2.28809
cds4694	WP_012485277.1	Chromosome	TetR/AcrR family transcriptional regulator	1.36416
cds4695	WP_016737306.1	Chromosome	AraC family transcriptional regulator	1.5717
cds4701	WP_012485283.1	Chromosome	spermidine/putrescine ABC transporter substrate-binding protein	1.17
cds4702	WP_012485284.1	Chromosome	ABC transporter ATP-binding protein	3.75668
cds4703	WP_012485285.1	Chromosome	ABC transporter permease	2.66294
cds4704	WP_004678022.1	Chromosome	ABC transporter permease	1.47212
cds4715	WP_016737317.1	Chromosome	TetR/AcrR family transcriptional regulator	1.58597
cds4730	WP_016737327.1	Chromosome	AcrB/AcrD/AcrF family protein	2.30303
cds4731	WP_016737328.1	Chromosome	efflux RND transporter periplasmic adaptor subunit	2.69069
cds4732	WP_012485310.1	Chromosome	TetR/AcrR family transcriptional regulator	1.58331
cds4737	WP_016737332.1	Chromosome	L-arabinose ABC transporter ATP-binding protein AraG	1.9544
cds4738	WP_016737333.1	Chromosome	arabinose ABC transporter substrate-binding protein	3.57858
cds4739	WP_029532271.1	Chromosome	FadR family transcriptional regulator	3.29205
cds4740	WP_016737335.1	Chromosome	galactonate dehydratase	1.57307
cds4753	WP_016737530.1	Chromosome	7-cyano-7-deazaguanine synthase QueC	1.4943
cds4784	WP_012485357.1	Chromosome	DUF4167 domain-containing protein	1.89708
cds4788	WP_004671807.1	Chromosome	aspartate kinase	1.74822
cds4807	WP_012485375.1	Chromosome	TetR/AcrR family transcriptional regulator	1.23179
cds4808	WP_012485376.1	Chromosome	MFS transporter	1.18262
cds4827	WP_012485393.1	Chromosome	argininosuccinate lyase	1.55415
cds4832	WP_004671390.1	Chromosome	hypoxanthine phosphoribosyltransferase	1.21416
cds4849	WP_004679586.1	Chromosome	50S ribosomal protein L28	3.32608
cds4850	WP_016736456.1	Chromosome	membrane protein	2.75148
cds4853	WP_016736453.1	Chromosome	cobaltochelatase subunit CobT	1.14813
cds4854	WP_004679595.1	Chromosome	cobaltochelatase subunit CobS	1.01792
cds4855	WP_004679597.1	Chromosome	molecular chaperone DnaJ	1.1883
cds4899	WP_016736406.1	Chromosome	LacI family transcriptional regulator	2.0007
cds4905	WP_016736403.1	Chromosome	arginase	4.18222
cds4906	WP_012485447.1	Chromosome	ornithine--oxo-acid transaminase	5.86081
cds4913	WP_016736400.1	Chromosome	formate dehydrogenase subunit beta	1.70036
cds4929	WP_016736392.1	Chromosome	ATP synthase subunit alpha	1.20993
cds4930	WP_016736391.1	Chromosome	F0F1 ATP synthase subunit delta	2.38582
cds4942	WP_016736382.1	Chromosome	hypothetical protein	1.30015
cds4943	WP_016736381.1	Chromosome	DUF4241 domain-containing protein	1.12979
cds4944	WP_016736380.1	Chromosome	dihydrolipoyllysine-residue succinyltransferase	1.1438
cds4945	WP_016736379.1	Chromosome	hypothetical protein	1.02323
cds4946	WP_012485483.1	Chromosome	2-oxoglutarate dehydrogenase E1 component	1.25339
cds4947	WP_016736377.1	Chromosome	succinate--CoA ligase subunit alpha	1.2756
cds4948	WP_016736376.1	Chromosome	DUF1579 domain-containing protein	1.2689
cds4949	WP_016736375.1	Chromosome	ADP-forming succinate--CoA ligase subunit beta	1.09233
cds4976	WP_012485506.1	Chromosome	translational GTPase TypA	2.85845
cds4980	WP_016736350.1	Chromosome	NUDIX hydrolase	1.28961
cds4981	WP_016736349.1	Chromosome	hypothetical protein	1.67925
cds4987	WP_016736344.1	Chromosome	ABC transporter ATP-binding protein	1.09952
cds4988	WP_016736343.1	Chromosome	ABC transporter permease	1.27804
cds4989	WP_016736342.1	Chromosome	ABC transporter substrate-binding protein	1.97733
cds4990	WP_012485518.1	Chromosome	23S rRNA (adenine(2503)-C(2))-methyltransferase RlmN	1.8281
cds5008	WP_029531880.1	Chromosome	heme transporter HemC	1.53693
cds5009	WP_016736335.1	Chromosome	heme exporter protein CcmD	1.52742
cds5017	gbkey=CDS	Chromosome	hypothetical protein	1.81153
cds5023	WP_012485544.1	Chromosome	50S ribosomal protein L19	3.03669
cds5026	WP_016736326.1	Chromosome	3-isopropylmalate dehydratase large subunit	1.84465
cds5058	WP_016736307.1	Chromosome	ABC transporter permease	1.00249
cds5059	WP_016736306.1	Chromosome	ABC transporter ATP-binding protein	1.07845
cds5083	WP_003543812.1	Chromosome	50S ribosomal protein L32	3.62415
cds5092	WP_011427210.1	Chromosome	ferredoxin family protein	1.57677
cds5096	WP_012485601.1	Chromosome	MFS transporter	1.41222
cds5098	WP_012485603.1	Chromosome	thiamine diphosphokinase	1.39324
cds5103	WP_012485607.1	Chromosome	GntR family transcriptional regulator	1.98464
cds5104	WP_016736281.1	Chromosome	SIS domain-containing protein	2.92852
cds5105	WP_016736280.1	Chromosome	N-acetylglucosamine-6-phosphate deacetylase	2.8658
cds5106	WP_016736279.1	Chromosome	sugar isomerase domain-containing protein	2.04913
cds5107	WP_016736278.1	Chromosome	FAD-binding oxidoreductase	1.11373
cds5112	WP_008528334.1	Chromosome	elongation factor P	2.50045
cds5113	WP_016736273.1	Chromosome	EF-P lysine aminoacylase GenX	1.09236
cds5127	WP_016736261.1	Chromosome	aldehyde dehydrogenase family protein	1.04757
cds5128	WP_016736260.1	Chromosome	iron ABC transporter substrate-binding protein	1.35325
cds5129	WP_016736259.1	Chromosome	iron ABC transporter permease	1.22244
cds5134	WP_016736255.1	Chromosome	TetR/AcrR family transcriptional regulator	1.89628
cds5135	WP_016736254.1	Chromosome	50S ribosomal protein L21	1.96574
cds5136	WP_004676172.1	Chromosome	50S ribosomal protein L27	1.62645
cds5137	WP_012485632.1	Chromosome	N-acetyltransferase	1.03705
cds5158	WP_004675276.1	Chromosome	Zn-dependent protease	1.25957
cds5162	WP_016736236.1	Chromosome	VOC family protein	1.19048
cds5165	WP_010024973.1	Chromosome	3-isopropylmalate dehydrogenase	1.13227
cds5172	WP_029531858.1	Chromosome	hypothetical protein	2.11725
cds5173	WP_016736226.1	Chromosome	aspartate-semialdehyde dehydrogenase	1.79939
cds5187	WP_010019544.1	Chromosome	DUF1013 domain-containing protein	2.97671
cds5199	WP_008528706.1	Chromosome	transcription termination factor Rho	1.30692
cds5222	WP_016736193.1	Chromosome	phosphoribosylanthranilate isomerase	1.19956
cds5233	WP_016736183.1	Chromosome	adenosylhomocysteinase	2.29224
cds5250	WP_012482121.1	Chromosome	imidazoleglycerol-phosphate dehydratase	1.65132
cds5282	WP_039751506.1	Chromosome	gfo/Idh/MocA family oxidoreductase	1.41033
cds5295	WP_012482163.1	Chromosome	30S ribosomal protein S1	1.4936
cds5297	WP_012482165.1	Chromosome	TIGR02300 family protein	2.00141
cds5298	WP_012482166.1	Chromosome	excinuclease ABC subunit C	1.0299
cds5341	WP_016735158.1	Chromosome	class I SAM-dependent methyltransferase	1.3918
cds5342	WP_016735157.1	Chromosome	polyribonucleotide nucleotidyltransferase	1.23646
cds5343	WP_029531690.1	Chromosome	30S ribosomal protein S15	1.54766
cds5345	WP_016735154.1	Chromosome	tRNA pseudouridine(55) synthase TruB	1.45709
cds5346	WP_012482211.1	Chromosome	ribosome-binding factor A	1.9538
cds5355	WP_016733259.1	Chromosome	transketolase	2.48961
cds5356	WP_012484068.1	Chromosome	ABC transporter permease	1.13808
cds5362	WP_046977143.1	Chromosome	EamA/RhaT family transporter	1.11456
cds5383	WP_016733282.1	Chromosome	S-adenosylmethionine-dependent methyltransferase	1.38905
cds5401	WP_016733295.1	Chromosome	exopolysaccharide biosynthesis protein	1.06979
cds5404	WP_016733298.1	Chromosome	nicotinate-nucleotide--dimethylbenzimidazole phosphoribosyltransferase	1.44987
cds5412	WP_016733305.1	Chromosome	short chain dehydrogenase	1.16194
cds5413	WP_004678436.1	Chromosome	ABC transporter permease	1.08038
cds5414	WP_016733306.1	Chromosome	ABC transporter ATP-binding protein	1.80623
cds5439	WP_003540486.1	Chromosome	acyl carrier protein	1.04282
cds5449	WP_016733325.1	Chromosome	membrane protein	1.43744
cds5451	end_range=100646,.	Chromosome	cobaltochelatase subunit CobN	1.35052
cds5453	WP_016733208.1	Chromosome	DUF1062 domain-containing protein	1.485
cds5454	WP_008525884.1	Chromosome	RNA polymerase-binding protein DksA	1.42747
cds5461	WP_029531256.1	Chromosome	dihydropteroate synthase	1.13569
cds5475	WP_016733219.1	Chromosome	MFS transporter	1.3256
cds5483	WP_029531262.1	Chromosome	3-deoxy-7-phosphoheptulonate synthase	1.37838
cds5491	WP_016733231.1	Chromosome	ABC transporter ATP-binding protein	1.47688
cds5492	WP_016733233.1	Chromosome	3-deoxy-7-phosphoheptulonate synthase class II	1.34689
cds5517	WP_016733120.1	Chromosome	N-acetyltransferase	1.1208
cds5564	WP_012483948.1	Chromosome	RluA family pseudouridine synthase	2.069
cds5565	WP_012483949.1	Chromosome	fluoride efflux transporter CrcB	1.00324
cds5568	WP_016733154.1	Chromosome	hypothetical protein	1.44104
cds5587	WP_004675609.1	Chromosome	tyrosine--tRNA ligase	2.10058
cds5594	WP_029531237.1	Chromosome	ATP-dependent helicase	1.73861
cds5606	WP_004676258.1	Chromosome	serine hydrolase family protein	1.20566
cds5610	WP_016733183.1	Chromosome	RNA 2'-phosphotransferase	1.18144
cds5612	WP_046977151.1	Chromosome	hypothetical protein	1.35715
cds5613	WP_016733185.1	Chromosome	DUF1127 domain-containing protein	1.79186
cds5614	WP_016733186.1	Chromosome	PLP-dependent aminotransferase family protein	3.03856
cds5618	WP_012483988.1	Chromosome	hypothetical protein	1.08678
cds5621	WP_012483991.1	Chromosome	Bcr/CflA family drug resistance efflux transporter	1.02465
cds5626	WP_012483995.1	Chromosome	tRNA 2-thiocytidine(32) synthetase TtcA	1.04084
cds5627	WP_010024905.1	Chromosome	glutaminase	1.61001
cds5628	WP_004676212.1	Chromosome	30S ribosomal protein S4	3.0028
cds5646	gbkey=CDS	Chromosome	translation initiation factor IF-2	1.26755
cds5647	WP_004673396.1	Chromosome	DNA-binding protein	1.10215
cds5648	WP_004673395.1	Chromosome	transcription termination/antitermination protein NusA	1.9307
cds5649	WP_004673394.1	Chromosome	ribosome maturation factor RimP	2.98342
cds5659	end_range=11518,.	Chromosome	SAM-dependent methyltransferase	1.06843
cds5667	WP_004672641.1	Chromosome	cytochrome c family protein	1.01433
cds5687	WP_004677177.1	Chromosome	ABC transporter permease	1.03345
cds5703	WP_004673514.1	Chromosome	carbon-phosphorus lyase complex subunit PhnJ	1.19301
cds5704	WP_016735120.1	Chromosome	carbon-phosphorus lyase complex subunit PhnI	1.78469
cds5705	WP_016735119.1	Chromosome	phosphonate C-P lyase system protein PhnH	1.16917
cds5706	WP_016735118.1	Chromosome	phosphonate C-P lyase system protein PhnG	2.85138
cds5707	WP_016735117.1	Chromosome	phosphonate metabolism transcriptional regulator PhnF	2.23941
cds5710	WP_004673526.1	Chromosome	ABC transporter ATP-binding protein	1.37481
cds5729	WP_004673556.1	Chromosome	ABC transporter permease	1.26434
cds5730	WP_004673557.1	Chromosome	cytidine deaminase	1.34821
cds5731	WP_016735102.1	Chromosome	purine-nucleoside phosphorylase	1.00715
cds5732	WP_004673564.1	Chromosome	deoxyribose-phosphate aldolase	1.13646
cds5747	WP_004668690.1	Chromosome	CpaF family protein	1.4959
cds5776	WP_016735074.1	Chromosome	elongation factor 4	1.5614
cds5778	WP_016735072.1	Chromosome	XRE family transcriptional regulator	1.34258
cds5789	WP_003570998.1	Chromosome	50S ribosomal protein L35	3.19597
cds5790	WP_004673860.1	Chromosome	50S ribosomal protein L20	2.69529
cds5791	WP_016735064.1	Chromosome	phenylalanine--tRNA ligase subunit alpha	1.66031
cds5806	WP_016735051.1	Chromosome	flavodoxin family protein	1.04485
cds5825	WP_016735033.1	Chromosome	GMP synthase (glutamine-hydrolyzing)	1.32552
cds5854	WP_016735010.1	Chromosome	LysE family translocator	1.00768
cds5858	WP_016735006.1	Chromosome	peptide chain release factor 3	1.90962
cds5864	WP_016735000.1	Chromosome	MFS transporter	1.41356
cds5865	WP_016734999.1	Chromosome	FadR family transcriptional regulator	1.19266
cds5882	WP_008524652.1	Chromosome	30S ribosomal protein S20	3.6617
cds5895	WP_012482410.1	Chromosome	methionine adenosyltransferase	2.93917
cds5908	WP_004679829.1	Chromosome	tryptophan--tRNA ligase	1.75088
cds5933	WP_003570770.1	Chromosome	PTS IIA-like nitrogen-regulatory protein PtsN	1.0338
cds5938	WP_029531659.1	Chromosome	peptide deformylase	2.21985
cds5953	WP_012482454.1	Chromosome	acetylglutamate kinase	1.72392
cds5958	WP_010017635.1	Chromosome	hypothetical protein	1.33674
cds5959	WP_012482459.1	Chromosome	hypothetical protein	1.66872
cds5960	WP_016737600.1	Chromosome	cold-shock protein	1.08304
cds5963	WP_004673114.1	Chromosome	ribonuclease P protein component	2.17147
cds5964	WP_008524438.1	Chromosome	50S ribosomal protein L34	1.85545
cds5967	gbkey=CDS	Chromosome	nuclease	1.66892
cds5971	WP_029531653.1	Chromosome	hypothetical protein	1.14585
cds5981	WP_016734917.1	Chromosome	competence protein TfoX	1.06282
cds5982	WP_016734916.1	Chromosome	nuclear transport factor 2 family protein	1.67136
cds5983	WP_010024680.1	Chromosome	TetR/AcrR family transcriptional regulator	3.2046
cds5984	WP_016734915.1	Chromosome	transcriptional regulator	1.20605
cds5988	WP_016734910.1	Chromosome	NADP-dependent oxidoreductase	1.84203
cds5989	WP_016734909.1	Chromosome	TetR/AcrR family transcriptional regulator	1.46534
cds5992	WP_016734907.1	Chromosome	ROK family transcriptional regulator	2.13631
cds5993	WP_016734906.1	Chromosome	sugar ABC transporter substrate-binding protein	1.56833
cds6000	WP_012482521.1	Chromosome	DUF1772 domain-containing protein	2.01107
cds6044	WP_012482562.1	Chromosome	Hsp33 family molecular chaperone	1.40624
cds6047	WP_012482564.1	Chromosome	O-succinylhomoserine sulfhydrylase	1.06398
cds6053	WP_004673725.1	Chromosome	hypothetical protein	1.0762
cds6064	WP_016734859.1	Chromosome	YitT family protein	2.94748
cds6081	WP_004675957.1	Chromosome	cold-shock protein	1.7249
cds6083	WP_010010011.1	Chromosome	GFA family protein	1.10011
cds6089	WP_016734842.1	Chromosome	pyridoxal phosphate-dependent aminotransferase	1.4337
cds6106	WP_003545338.1	Chromosome	translation initiation factor IF-1	1.39675
cds6133	WP_004674538.1	Chromosome	LacI family transcriptional regulator	1.37746
cds6135	WP_012482641.1	Chromosome	sugar ABC transporter substrate-binding protein	2.16911
cds6136	WP_016734810.1	Chromosome	sugar ABC transporter ATP-binding protein	3.85826
cds6137	WP_016734809.1	Chromosome	ABC transporter permease	3.03902
cds6156	WP_016734797.1	Chromosome	protein translocase subunit SecDF	1.97425
cds6230	WP_016734759.1	Chromosome	phosphogluconate dehydratase	1.11342
cds6232	WP_004673775.1	Chromosome	glucose-6-phosphate dehydrogenase	2.24339
cds6249	WP_016734743.1	Chromosome	PAS domain-containing sensor histidine kinase	1.60425
cds6250	WP_012482731.1	Chromosome	phasin	3.91968
cds6259	WP_004676182.1	Chromosome	peptide ABC transporter permease	1.1621
cds6260	WP_012482735.1	Chromosome	dipeptide ABC transporter permease DppC	1.39582
cds6261	WP_016734733.1	Chromosome	ABC transporter ATP-binding protein	1.713
cds6262	WP_004676185.1	Chromosome	ABC transporter ATP-binding protein	1.35141
cds6276	WP_016734719.1	Chromosome	acylneuraminate cytidylyltransferase	1.0709
cds6288	WP_016734707.1	Chromosome	glycosyl transferase	1.23383
cds6289	WP_016734706.1	Chromosome	hypothetical protein	1.69457
cds6297	WP_012482792.1	Chromosome	IMP dehydrogenase	2.23105
cds6308	WP_016734693.1	Chromosome	inorganic phosphate transporter	1.50214
cds6312	WP_016734689.1	Chromosome	glycolate oxidase subunit GlcE	1.19793
cds6325	WP_029531624.1	Chromosome	histidine--tRNA ligase	1.31995
cds6337	WP_029531621.1	Chromosome	isoleucine--tRNA ligase	1.50629
cds6366	WP_012482854.1	Chromosome	magnesium transporter	1.08603
cds6369	WP_004675822.1	Chromosome	F0F1 ATP synthase assembly protein	1.85194
cds6370	WP_010004512.1	Chromosome	ATP synthase subunit A	1.64
cds6375	WP_016734649.1	Chromosome	radical SAM protein	1.15344
cds6376	WP_016734648.1	Chromosome	glycosyl transferase	1.41564
cds6382	WP_004672609.1	Chromosome	DUF2007 domain-containing protein	2.14311
cds6383	WP_016734642.1	Chromosome	methyltransferase domain-containing protein	4.65282
cds6384	WP_016734641.1	Chromosome	divalent metal cation transporter	5.01512
cds6394	WP_016734634.1	Chromosome	phosphoribosylamine--glycine ligase	1.19662
cds6406	WP_029531614.1	Chromosome	threonylcarbamoyl-AMP synthase	1.16554
cds6413	WP_016734620.1	Chromosome	acyl-CoA dehydrogenase	1.10778
cds6416	WP_016734618.1	Chromosome	oxidoreductase	1.53008
cds6417	WP_016734617.1	Chromosome	transcriptional regulator	1.53299
cds6419	WP_029531612.1	Chromosome	TlyA family rRNA (cytidine-2'-O)-methyltransferase	1.23234
cds6429	WP_016734606.1	Chromosome	MCD%2C Malonyl-CoA decarboxylase MCD	2.37997
cds6443	WP_016734594.1	Chromosome	ABC transporter ATP-binding protein	1.27286
cds6444	WP_016734593.1	Chromosome	winged helix-turn-helix domain-containing protein	1.05821
cds6449	gbkey=CDS	Chromosome	hypothetical protein	1.26507
cds6450	WP_012482921.1	Chromosome	histidine phosphatase family protein	1.57239
cds6451	WP_016734590.1	Chromosome	enoyl-[acyl-carrier-protein] reductase FabI	2.04413
cds6481	WP_016734570.1	Chromosome	ABC transporter ATP-binding protein	1.61761
cds6482	WP_010021814.1	Chromosome	metal ABC transporter permease	1.40628
cds6489	WP_016734566.1	Chromosome	threonine synthase	1.41867
cds6491	WP_016734564.1	Chromosome	haloacid dehalogenase	2.09787
cds6498	WP_016734557.1	Chromosome	NIPSNAP family protein	1.10154
cds6507	WP_016734549.1	Chromosome	fucose-binding protein	1.24874
cds6508	WP_016734548.1	Chromosome	LacI family transcriptional regulator	1.49776
cds6534	WP_016734523.1	Chromosome	PspA/IM30 family protein	2.20685
cds6535	WP_016734522.1	Chromosome	hypothetical protein	1.30965

## Sheet: TableS2
Supplementary table S2. Up-regulated genes of R. phaseoli Ch24-10 in maize exudates compared to Ch24-10 in Fahraeus solution
ORF	NCBI Protein ID	Locus	Product	logFC
cds21	WP_016736932.1	Plasmid_A	amino acid synthesis family protein	5.36082
cds22	WP_016736931.1	Plasmid_A	alpha/beta hydrolase	5.20262
cds23	WP_016736930.1	Plasmid_A	flavin monooxygenase/reductase	4.0933
cds24	WP_016736929.1	Plasmid_A	LLM class flavin-dependent oxidoreductase	2.95599
cds25	WP_016736928.1	Plasmid_A	carnitine dehydratase	1.34688
cds40	WP_016736912.1	Plasmid_A	glycosyltransferase family 2 protein	1.1114
cds41	WP_016736911.1	Plasmid_A	SIS domain-containing protein	1.4788
cds58	WP_016736895.1	Plasmid_A	alpha-L-fucosidase	2.72305
cds59	WP_016736894.1	Plasmid_A	LacI family transcriptional regulator	5.04825
cds60	WP_016736893.1	Plasmid_A	peptide ABC transporter	4.32516
cds61	WP_016736892.1	Plasmid_A	ABC transporter permease	2.21767
cds62	WP_016736891.1	Plasmid_A	ABC transporter permease	1.26041
cds63	WP_039752298.1	Plasmid_A	ABC transporter ATP-binding protein	1.17786
cds115	WP_016736844.1	Plasmid_A	ABC transporter permease	1.01307
cds116	WP_039752308.1	Plasmid_A	ABC transporter substrate-binding protein	2.12625
cds117	WP_016736842.1	Plasmid_A	IclR family transcriptional regulator	1.62261
cds118	WP_029532041.1	Plasmid_A	hypothetical protein	4.89752
cds119	WP_016736839.1	Plasmid_A	sn-glycerol-3-phosphate ABC transporter substrate-binding protein UgpB	1.80666
cds122	WP_016736836.1	Plasmid_A	sn-glycerol-3-phosphate import ATP-binding protein UgpC	1.00007
cds123	WP_016736835.1	Plasmid_A	glycerophosphoryl diester phosphodiesterase	1.13928
cds150	WP_029532030.1	Plasmid_A	ABC transporter substrate-binding protein	1.29492
cds159	WP_004674652.1	Plasmid_A	ABC transporter permease	1.00463
cds208	WP_029532139.1	Plasmid_A	LacI family transcriptional regulator	1.04218
cds209	WP_010016978.1	Plasmid_A	carbohydrate ABC transporter permease	1.23049
cds210	WP_016737081.1	Plasmid_A	sugar ABC transporter permease	1.92427
cds229	WP_004674667.1	Plasmid_A	formaldehyde dehydrogenase%2C glutathione-independent	1.57674
cds245	WP_016737053.1	Plasmid_A	peptide ABC transporter substrate-binding protein	3.24396
cds246	WP_016737052.1	Plasmid_A	peptidase	1.96222
cds250	WP_016737048.1	Plasmid_A	SMP-30/gluconolactonase/LRE family protein	1.08505
cds252	WP_016737046.1	Plasmid_A	L-idonate 5-dehydrogenase	1.23154
cds253	WP_016737045.1	Plasmid_A	2-hydroxyacid dehydrogenase	2.71408
cds254	WP_016737044.1	Plasmid_A	KR domain-containing protein	2.68859
cds255	WP_016737043.1	Plasmid_A	gluconokinase	2.19665
cds256	WP_016737042.1	Plasmid_A	NAD(P)-dependent oxidoreductase	1.36555
cds257	WP_016737041.1	Plasmid_A	sugar ABC transporter ATP-binding protein	2.00527
cds268	WP_004670792.1	Plasmid_A	histidine/lysine/arginine/ornithine ABC transporter ATP-binding protein HisP	1.73086
cds269	WP_016737032.1	Plasmid_A	amino acid ABC transporter	1.01391
cds278	WP_016737023.1	Plasmid_A	FMN-dependent monooxygenase	1.20657
cds279	WP_004670822.1	Plasmid_A	IclR family transcriptional regulator	2.54081
cds280	WP_029532110.1	Plasmid_A	ABC transporter substrate-binding protein	2.4917
cds315	WP_016736987.1	Plasmid_A	carbohydrate ABC transporter substrate-binding protein	1.48919
cds324	WP_016736978.1	Plasmid_A	alpha-ketoglutarate-dependent dioxygenase AlkB	1.21555
cds325	WP_016736977.1	Plasmid_A	hypothetical protein	1.8393
cds326	WP_004670929.1	Plasmid_A	30S ribosomal protein S21	1.34494
cds334	WP_016736970.1	Plasmid_A	TRAP transporter small permease	1.83086
cds335	WP_016736969.1	Plasmid_A	dehydroascorbate transporter	1.24198
cds353	WP_016736659.1	Plasmid_B	potassium-transporting ATPase subunit KdpA	1.2641
cds372	WP_012490604.1	Plasmid_B	iron-hydroxamate transporter ATP-binding protein	1.03667
cds378	WP_016736679.1	Plasmid_B	sugar ABC transporter ATP-binding protein	1.25993
cds380	WP_004678031.1	Plasmid_B	DeoR/GlpR transcriptional regulator	2.46444
cds381	WP_016736680.1	Plasmid_B	bifunctional rhamnulose-1-phosphate aldolase/short-chain dehydrogenase	3.57224
cds382	WP_012490613.1	Plasmid_B	L-rhamnose catabolism isomerase	1.87139
cds385	WP_016736682.1	Plasmid_B	amidohydrolase/deacetylase family metallohydrolase	1.43382
cds386	WP_012490616.1	Plasmid_B	IclR family transcriptional regulator	1.03371
cds388	gbkey=CDS	Plasmid_B	transcriptional regulator	1.57656
cds389	WP_029531971.1	Plasmid_B	hypothetical protein	1.22565
cds390	WP_016736685.1	Plasmid_B	TetR/AcrR family transcriptional regulator	1.13923
cds392	WP_016736686.1	Plasmid_B	DUF1810 domain-containing protein	1.22101
cds393	WP_039752239.1	Plasmid_B	hypothetical protein	1.1446
cds397	WP_029531975.1	Plasmid_B	LysR family transcriptional regulator	1.19401
cds406	WP_016736698.1	Plasmid_B	peptide ABC transporter substrate-binding protein	1.58934
cds407	WP_016736699.1	Plasmid_B	glycoside hydrolase family 3 protein	2.04312
cds408	WP_016736700.1	Plasmid_B	N-acetyltransferase	4.00579
cds409	WP_016736701.1	Plasmid_B	bifunctional hydroxymethylpyrimidine kinase/phosphomethylpyrimidine kinase	1.75591
cds413	WP_016736705.1	Plasmid_B	peptide ABC transporter	3.92813
cds416	WP_016736706.1	Plasmid_B	ABC transporter permease	1.1094
cds417	WP_012490645.1	Plasmid_B	RidA family protein	1.10041
cds430	WP_029531978.1	Plasmid_B	hypothetical protein	4.89994
cds434	WP_029531980.1	Plasmid_B	membrane protein	1.59718
cds459	WP_012490684.1	Plasmid_B	flagellin	2.26763
cds463	WP_039752254.1	Plasmid_B	2-deoxy-D-gluconate 3-dehydrogenase	1.44378
cds464	WP_016736741.1	Plasmid_B	5-dehydro-4-deoxy-D-glucuronate isomerase	1.62569
cds465	WP_004669789.1	Plasmid_B	DUF1127 domain-containing protein	2.82256
cds468	WP_016736744.1	Plasmid_B	aldo/keto reductase	1.34269
cds471	WP_029531995.1	Plasmid_B	septum formation inhibitor MinC	1.71339
cds472	WP_016736747.1	Plasmid_B	TetR/AcrR family transcriptional regulator	6.12689
cds473	WP_016736748.1	Plasmid_B	efflux RND transporter periplasmic adaptor subunit	6.65652
cds474	WP_046977157.1	Plasmid_B	AcrB/AcrD/AcrF family protein	4.15726
cds475	gbkey=CDS	Plasmid_B	TetR family transcriptional regulator	2.24467
cds476	WP_016736751.1	Plasmid_B	hypothetical protein	2.30832
cds477	WP_012490702.1	Plasmid_B	oxidoreductase	6.51798
cds478	WP_012490703.1	Plasmid_B	formyltetrahydrofolate deformylase	3.64736
cds507	WP_012490730.1	Plasmid_B	nicotinate-nucleotide diphosphorylase (carboxylating)	1.56376
cds508	WP_016736774.1	Plasmid_B	L-aspartate oxidase	1.42989
cds521	WP_016736787.1	Plasmid_B	precorrin-2 C(20)-methyltransferase	1.39977
cds522	WP_016736788.1	Plasmid_B	precorrin-8X methylmutase	1.83736
cds565	WP_016736508.1	Plasmid_B	cytochrome o ubiquinol oxidase subunit I	1.0046
cds566	WP_029531919.1	Plasmid_B	ubiquinol oxidase subunit II	1.81791
cds569	WP_016736513.1	Plasmid_B	hypothetical protein	1.89557
cds570	WP_016736514.1	Plasmid_B	type II toxin-antitoxin system RelE/ParE family toxin	1.60096
cds571	WP_016736515.1	Plasmid_B	hypothetical protein	1.34215
cds601	WP_029531931.1	Plasmid_B	pca operon transcription factor PcaQ	1.36505
cds602	WP_016736539.1	Plasmid_B	DUF2384 domain-containing protein	1.36073
cds617	WP_016736553.1	Plasmid_B	urocanate hydratase	1.10881
cds618	WP_016736554.1	Plasmid_B	N-formylglutamate deformylase	2.79356
cds619	WP_016736555.1	Plasmid_B	histidine ammonia-lyase	4.13943
cds620	WP_029531939.1	Plasmid_B	imidazolonepropionase	4.30604
cds621	WP_016736556.1	Plasmid_B	formimidoylglutamate deiminase	4.41317
cds622	WP_016736557.1	Plasmid_B	histidine utilization repressor	3.58617
cds623	WP_012490471.1	Plasmid_B	histidine utilization repressor	2.48539
cds624	WP_080956176.1	Plasmid_B	hypothetical protein	1.42003
cds625	WP_012490473.1	Plasmid_B	ABC transporter substrate-binding protein	3.17191
cds626	WP_016736558.1	Plasmid_B	ABC transporter permease	3.20126
cds627	WP_004674851.1	Plasmid_B	ABC transporter permease	2.68384
cds628	WP_012490476.1	Plasmid_B	histidine/lysine/arginine/ornithine ABC transporter ATP-binding protein HisP	1.90712
cds629	WP_016736559.1	Plasmid_B	histidine ammonia-lyase	1.49311
cds637	WP_046977160.1	Plasmid_B	alpha-glucosidase/alpha-galactosidase	1.82697
cds638	WP_016736567.1	Plasmid_B	periplasmic alpha-galactoside-binding protein	1.08311
cds667	WP_016736594.1	Plasmid_B	AMP-dependent synthetase	1.36186
cds689	WP_016736613.1	Plasmid_B	IclR family transcriptional regulator	1.33564
cds785	WP_004671987.1	Plasmid_C	XRE family transcriptional regulator	3.0407
cds820	WP_016737490.1	Plasmid_C	hypothetical protein	1.94118
cds836	WP_011053466.1	Plasmid_C	hypothetical protein	2.10851
cds872	WP_004679687.1	Plasmid_C	nodulation protein A	1.38462
cds962	gbkey=CDS	Plasmid_C	hypothetical protein	1.15617
cds984	WP_016737400.1	Plasmid_C	beta-glucosidase	1.17165
cds1006	WP_077991535.1	Plasmid_C	hypothetical protein	1.25934
cds1007	WP_016737410.1	Plasmid_C	hypothetical protein	2.90462
cds1008	gbkey=CDS	Plasmid_C	hypothetical protein	1.24894
cds1013	WP_008534237.1	Plasmid_C	hypothetical protein	1.74892
cds1014	WP_046977176.1	Plasmid_C	hypothetical protein	1.52843
cds1015	WP_046977177.1	Plasmid_C	EscJ/YscJ/HrcJ family type III secretion inner membrane ring protein	2.52675
cds1016	WP_046977178.1	Plasmid_C	hypothetical protein	1.35641
cds1017	WP_046977179.1	Plasmid_C	HrpE/YscL family type III secretion apparatus protein	2.70079
cds1018	WP_046977180.1	Plasmid_C	FliI/YscN family ATPase	1.43255
cds1028	WP_009995183.1	Plasmid_C	hypothetical protein	1.09223
cds1032	WP_010031884.1	Plasmid_C	hypothetical protein	1.06563
cds1045	WP_011053340.1	Plasmid_C	NAD(P)-dependent oxidoreductase	1.35657
cds1064	WP_016737424.1	Plasmid_C	AraC family transcriptional regulator	1.19511
cds1065	WP_016737426.1	Plasmid_C	oxidoreductase	1.25712
cds1070	WP_011053353.1	Plasmid_C	MBL fold metallo-hydrolase	1.31113
cds1074	WP_008534369.1	Plasmid_C	alpha/beta hydrolase	1.39137
cds1076	WP_004671535.1	Plasmid_C	SDR family NAD(P)-dependent oxidoreductase	2.07033
cds1077	WP_008534378.1	Plasmid_C	flavin reductase	4.00821
cds1078	WP_008534380.1	Plasmid_C	4-carboxymuconolactone decarboxylase	3.88293
cds1079	WP_016737431.1	Plasmid_C	LLM class flavin-dependent oxidoreductase	2.77397
cds1086	WP_016737436.1	Plasmid_C	NAD(P)-dependent alcohol dehydrogenase	1.39397
cds1088	WP_016737437.1	Plasmid_C	sugar ABC transporter substrate-binding protein	4.28453
cds1089	WP_039752580.1	Plasmid_C	sugar ABC transporter ATP-binding protein	3.06886
cds1195	WP_016735367.1	Plasmid_D	oxidoreductase	1.10104
cds1196	WP_016735368.1	Plasmid_D	acyl-CoA thioesterase	1.53353
cds1210	WP_016735379.1	Plasmid_D	sugar kinase	2.52824
cds1211	WP_016735380.1	Plasmid_D	hypothetical protein	2.38942
cds1244	WP_016735412.1	Plasmid_D	TRAP transporter large permease	1.07484
cds1245	WP_016735413.1	Plasmid_D	L-idonate 5-dehydrogenase	1.53189
cds1290	WP_016735454.1	Plasmid_D	LysR family transcriptional regulator	1.04746
cds1305	WP_016735468.1	Plasmid_D	hypothetical protein	1.39072
cds1317	WP_029531734.1	Plasmid_D	dihydrodipicolinate synthase family protein	2.54373
cds1318	WP_039751730.1	Plasmid_D	GntR family transcriptional regulator	1.58052
cds1347	WP_016735504.1	Plasmid_D	XRE family transcriptional regulator	1.68832
cds1369	WP_016735525.1	Plasmid_D	thiol reductant ABC exporter subunit CydD	1.49005
cds1370	WP_016735526.1	Plasmid_D	GbsR/MarR family transcriptional regulator	1.05793
cds1389	WP_016735543.1	Plasmid_D	LacI family DNA-binding transcriptional regulator	1.0672
cds1390	WP_029531741.1	Plasmid_D	gfo/Idh/MocA family oxidoreductase	3.63019
cds1391	WP_016735545.1	Plasmid_D	sugar phosphate isomerase/epimerase	3.51123
cds1399	WP_016735548.1	Plasmid_D	methyltransferase domain-containing protein	2.71333
cds1404	WP_016735553.1	Plasmid_D	amidase	1.55189
cds1405	WP_004674459.1	Plasmid_D	BMP family ABC transporter substrate-binding protein	1.17894
cds1444	WP_016735584.1	Plasmid_D	hypothetical protein	1.31749
cds1461	WP_016735600.1	Plasmid_D	DNA-binding protein	3.12824
cds1462	WP_016735601.1	Plasmid_D	hypothetical protein	2.81563
cds1554	WP_029531769.1	Plasmid_D	ABC transporter permease	1.47133
cds1555	WP_016735681.1	Plasmid_D	ABC transporter substrate-binding protein	2.21657
cds1556	WP_029531770.1	Plasmid_D	dihydrodipicolinate synthase family protein	1.93384
cds1557	WP_016735683.1	Plasmid_D	glycosyl hydrolase	1.55703
cds1558	WP_016735684.1	Plasmid_D	alcohol dehydrogenase	3.52074
cds1559	WP_016735685.1	Plasmid_D	4-hydroxythreonine-4-phosphate dehydrogenase PdxA	2.28467
cds1565	WP_016735690.1	Plasmid_D	ABC transporter ATP-binding protein	1.40613
cds1566	WP_004673596.1	Plasmid_D	ABC transporter ATP-binding protein	2.20889
cds1567	WP_016735691.1	Plasmid_D	glycerol-3-phosphate dehydrogenase	1.793
cds1574	WP_016735696.1	Plasmid_D	ABC transporter ATP-binding protein	1.16228
cds1577	WP_016735699.1	Plasmid_D	EmrB/QacA family drug resistance transporter	3.89925
cds1578	WP_016735700.1	Plasmid_D	HlyD family secretion protein	4.92359
cds1579	WP_029531771.1	Plasmid_D	TetR/AcrR family transcriptional regulator	3.79473
cds1580	WP_016735702.1	Plasmid_D	mannonate dehydratase	1.7192
cds1600	WP_016735722.1	Plasmid_D	amino acid ABC transporter ATP-binding protein	1.21215
cds1603	WP_016735725.1	Plasmid_D	ABC transporter substrate-binding protein	5.47254
cds1604	end_range=413057,.	Plasmid_D	flagellar protein	1.23088
cds1618	WP_016735739.1	Plasmid_D	ectoine/hydroxyectoine ABC transporter substrate-binding protein EhuB	1.39532
cds1619	WP_016735740.1	Plasmid_D	ectoine/hydroxyectoine ABC transporter ATP-binding protein EhuA	1.70737
cds1620	WP_016735741.1	Plasmid_D	PLP-dependent aminotransferase family protein	1.36766
cds1621	WP_004672121.1	Plasmid_D	Lrp/AsnC family transcriptional regulator	1.91639
cds1658	WP_016735773.1	Plasmid_D	mandelate racemase/muconate lactonizing enzyme family protein	1.45761
cds1659	WP_016735774.1	Plasmid_D	ABC transporter ATP-binding protein	1.12921
cds1661	WP_016735776.1	Plasmid_D	ABC transporter permease	1.02609
cds1662	WP_016735777.1	Plasmid_D	peptide ABC transporter	1.35084
cds1663	WP_012489932.1	Plasmid_D	FadR family transcriptional regulator	3.29354
cds1664	WP_016735778.1	Plasmid_D	NAD(P)-dependent oxidoreductase	2.04302
cds1665	WP_016735779.1	Plasmid_D	SMP-30/gluconolactonase/LRE family protein	1.6964
cds1666	WP_016735780.1	Plasmid_D	dihydrodipicolinate synthase family protein	1.22489
cds1681	WP_029531785.1	Plasmid_D	amino acid ABC transporter ATP-binding protein	1.07553
cds1682	WP_016735795.1	Plasmid_D	amino acid ABC transporter substrate-binding protein	2.49681
cds1700	WP_016735811.1	Plasmid_D	ABC transporter substrate-binding protein	1.05556
cds1718	WP_016735829.1	Plasmid_D	AcrB/AcrD/AcrF family protein	1.16714
cds1719	WP_016735830.1	Plasmid_D	efflux RND transporter periplasmic adaptor subunit	2.49951
cds1720	WP_016735831.1	Plasmid_D	efflux RND transporter periplasmic adaptor subunit	2.6829
cds1721	WP_029531790.1	Plasmid_D	TetR/AcrR family transcriptional regulator	1.12713
cds1722	WP_029531791.1	Plasmid_D	LacI family transcriptional regulator	1.26272
cds1731	WP_016735843.1	Plasmid_D	carbohydrate ABC transporter substrate-binding protein	1.01007
cds1733	WP_016735844.1	Plasmid_D	DUF3422 domain-containing protein	1.62654
cds1740	WP_004677397.1	Plasmid_D	LacI family transcriptional regulator	1.1935
cds1743	WP_004677391.1	Plasmid_D	FadR family transcriptional regulator	2.03577
cds1749	WP_016735856.1	Plasmid_D	carbohydrate-binding protein	2.54214
cds1750	WP_016735857.1	Plasmid_D	heparinase	4.69416
cds1751	WP_016735858.1	Plasmid_D	sugar ABC transporter permease	4.85838
cds1752	WP_016735859.1	Plasmid_D	carbohydrate ABC transporter permease	3.29806
cds1753	WP_016735860.1	Plasmid_D	glucoronyl hydrolase	3.57378
cds1754	WP_016735861.1	Plasmid_D	ABC transporter ATP-binding protein	2.02858
cds1756	WP_016735863.1	Plasmid_D	sugar ABC transporter substrate-binding protein	1.47132
cds1808	WP_016735911.1	Plasmid_D	FAD-binding oxidoreductase	1.53918
cds1809	WP_016735912.1	Plasmid_D	aldehyde dehydrogenase	2.63583
cds1810	WP_016735913.1	Plasmid_D	dihydrodipicolinate synthase family protein	3.67893
cds1811	WP_016735914.1	Plasmid_D	GntR family transcriptional regulator	4.72376
cds1829	WP_016735926.1	Plasmid_D	oxidoreductase	1.37836
cds1848	WP_029531803.1	Plasmid_D	hypothetical protein	1.05445
cds1856	WP_016735951.1	Plasmid_D	hypothetical protein	1.59872
cds1877	WP_016735970.1	Plasmid_D	GNAT family N-acetyltransferase	1.84044
cds1878	WP_016735971.1	Plasmid_D	iron-siderophore ABC transporter substrate-binding protein	1.40858
cds1881	WP_016735974.1	Plasmid_D	AraC family transcriptional regulator	1.18037
cds1893	WP_004669196.1	Plasmid_D	inositol 2-dehydrogenase	1.01084
cds1894	WP_029531810.1	Plasmid_D	hydroxypyruvate isomerase	1.69724
cds1895	WP_016735986.1	Plasmid_D	sugar ABC transporter ATP-binding protein	2.65333
cds1896	WP_016735987.1	Plasmid_D	ABC transporter permease	3.87471
cds1897	WP_004669204.1	Plasmid_D	LacI family transcriptional regulator	5.24782
cds1923	WP_016736009.1	Plasmid_D	amino acid ABC transporter ATP-binding protein	1.32969
cds1924	WP_004669259.1	Plasmid_D	amino acid ABC transporter permease	1.16277
cds1925	WP_016736010.1	Plasmid_D	amino acid ABC transporter permease	1.5289
cds1926	WP_004669265.1	Plasmid_D	amino acid ABC transporter	1.31812
cds1934	WP_016736015.1	Plasmid_D	TetR/AcrR family transcriptional regulator	1.73071
cds1935	WP_016736016.1	Plasmid_D	2-hydroxychromene-2-carboxylate isomerase	1.1734
cds2032	end_range=861851,.	Plasmid_D	hypothetical protein	1.39293
cds2033	WP_029531829.1	Plasmid_D	cold-shock protein	1.20726
cds2036	WP_016736098.1	Plasmid_D	hypothetical protein	2.65859
cds2037	WP_080956208.1	Plasmid_D	hypothetical protein	2.64017
cds2055	WP_016736110.1	Plasmid_D	curlin	2.13746
cds2056	WP_016736111.1	Plasmid_D	hypothetical protein	1.73884
cds2057	WP_029531832.1	Plasmid_D	curlin	2.02033
cds2058	end_range=876515,.	Plasmid_D	hypothetical protein	1.2864
cds2061	WP_016737599.1	Plasmid_D	cold-shock protein	1.86194
cds2086	WP_080956210.1	Plasmid_D	TetR/AcrR family transcriptional regulator	1.88949
cds2087	WP_016736140.1	Plasmid_D	hypothetical protein	1.01213
cds2107	WP_016736157.1	Plasmid_D	cold-shock protein	2.57288
cds2108	WP_016736158.1	Plasmid_D	hypothetical protein	2.35755
cds2109	WP_016736159.1	Plasmid_D	hypothetical protein	1.67452
cds2110	WP_016736160.1	Plasmid_D	hypothetical protein	1.95807
cds2111	end_range=922131,.	Plasmid_D	histidine kinase	1.17624
cds2132	WP_016735235.1	Plasmid_D	Arginase family	1.52575
cds2195	WP_080956220.1	Plasmid_D	cysteine hydrolase	1.46459
cds2197	WP_016735293.1	Plasmid_D	coniferyl aldehyde dehydrogenase	1.41431
cds2198	WP_016735294.1	Plasmid_D	NAD(P)-dependent alcohol dehydrogenase	1.93711
cds2199	WP_016735295.1	Plasmid_D	crotonase	2.38189
cds2200	WP_016735296.1	Plasmid_D	feruloyl-CoA synthetase	3.31589
cds2204	WP_016735300.1	Plasmid_D	ABC transporter substrate-binding protein	1.20374
cds2205	WP_016735301.1	Plasmid_D	ABC transporter ATP-binding protein	1.66593
cds2206	WP_016735302.1	Plasmid_D	ABC transporter ATP-binding protein	2.08013
cds2207	WP_016735303.1	Plasmid_D	branched-chain amino acid ABC transporter permease	1.32669
cds2209	WP_029531706.1	Plasmid_D	3-alpha-hydroxysteroid dehydrogenase	1.41699
cds2210	WP_016735306.1	Plasmid_D	salicylaldehyde dehydrogenase	1.28435
cds2242	WP_029531708.1	Plasmid_D	ribulose 1%2C5-bisphosphate carboxylase	2.74686
cds2243	WP_029531709.1	Plasmid_D	four-carbon acid sugar kinase family protein	1.92544
cds2244	WP_016735336.1	Plasmid_D	triose-phosphate isomerase	1.63207
cds2245	WP_004678734.1	Plasmid_D	ribose 5-phosphate isomerase B	2.1802
cds2246	WP_004678736.1	Plasmid_D	semialdehyde dehydrogenase	1.24386
cds2249	WP_004678740.1	Plasmid_D	sugar ABC transporter ATP-binding protein	1.06
cds2265	WP_029531713.1	Plasmid_D	sugar phosphate isomerase/epimerase	1.0744
cds2266	WP_016735351.1	Plasmid_D	ABC transporter ATP-binding protein	1.18555
cds2278	WP_080956221.1	Plasmid_D	hypothetical protein	1.19062
cds2366	WP_016734080.1	Cromosoma	hypothetical protein	1.52915
cds2390	WP_009998001.1	Cromosoma	30S ribosomal protein S9	4.08752
cds2391	WP_008521951.1	Cromosoma	50S ribosomal protein L13	4.3662
cds2392	WP_012483400.1	Cromosoma	LysR family transcriptional regulator	1.24573
cds2431	WP_016734044.1	Cromosoma	NADH-quinone oxidoreductase subunit G	1.12649
cds2441	WP_016734037.1	Cromosoma	methylmalonyl-CoA epimerase	1.00615
cds2442	WP_029531512.1	Cromosoma	DUF1467 domain-containing protein	1.15757
cds2455	WP_003587245.1	Cromosoma	50S ribosomal protein L33	3.3514
cds2462	WP_016734021.1	Cromosoma	dihydroorotase	1.21156
cds2463	WP_016734020.1	Cromosoma	aspartate carbamoyltransferase	1.47828
cds2469	WP_012483469.1	Cromosoma	peptide chain release factor 2	1.09439
cds2480	WP_003573826.1	Cromosoma	preprotein translocase subunit SecE	2.01408
cds2481	WP_004669067.1	Cromosoma	transcription termination/antitermination protein NusG	1.8054
cds2482	WP_004669070.1	Cromosoma	50S ribosomal protein L11	1.95162
cds2483	WP_004669072.1	Cromosoma	50S ribosomal protein L1	2.0566
cds2484	WP_037113092.1	Cromosoma	50S ribosomal protein L10	1.44175
cds2485	WP_004669074.1	Cromosoma	50S ribosomal protein L7/L12	1.19014
cds2489	WP_003547537.1	Cromosoma	30S ribosomal protein S12	5.79303
cds2490	WP_004669085.1	Cromosoma	30S ribosomal protein S7	5.46198
cds2491	WP_038688280.1	Cromosoma	elongation factor G	4.40703
cds2492	WP_004669088.1	Cromosoma	elongation factor Tu	1.55016
cds2493	WP_003547547.1	Cromosoma	30S ribosomal protein S10	3.4461
cds2494	WP_016734008.1	Cromosoma	50S ribosomal protein L3	3.14773
cds2495	WP_004674918.1	Cromosoma	50S ribosomal protein L4	2.80394
cds2496	WP_003547550.1	Cromosoma	50S ribosomal protein L23	2.70386
cds2497	WP_009986456.1	Cromosoma	50S ribosomal protein L2	2.21818
cds2498	WP_003573797.1	Cromosoma	30S ribosomal protein S19	1.56635
cds2499	WP_004674922.1	Cromosoma	50S ribosomal protein L22	1.44089
cds2500	WP_003573793.1	Cromosoma	30S ribosomal protein S3	1.1593
cds2504	WP_003573790.1	Cromosoma	50S ribosomal protein L14	4.32136
cds2505	WP_004674929.1	Cromosoma	50S ribosomal protein L24	4.11612
cds2506	WP_016734007.1	Cromosoma	50S ribosomal protein L5	3.54362
cds2507	WP_003573787.1	Cromosoma	30S ribosomal protein S14	3.38739
cds2508	WP_003547562.1	Cromosoma	30S ribosomal protein S8	2.84081
cds2509	WP_003578670.1	Cromosoma	50S ribosomal protein L6	2.32917
cds2510	WP_003573785.1	Cromosoma	50S ribosomal protein L18	1.85214
cds2511	WP_003573784.1	Cromosoma	30S ribosomal protein S5	1.75886
cds2512	WP_003547566.1	Cromosoma	50S ribosomal protein L30	1.6515
cds2513	WP_016734006.1	Cromosoma	50S ribosomal protein L15	1.2407
cds2516	WP_003573772.1	Cromosoma	30S ribosomal protein S13	3.53582
cds2517	WP_003547577.1	Cromosoma	30S ribosomal protein S11	2.78029
cds2518	WP_003547579.1	Cromosoma	DNA-directed RNA polymerase subunit alpha	2.39107
cds2519	WP_009995243.1	Cromosoma	50S ribosomal protein L17	1.96054
cds2520	WP_016734003.1	Cromosoma	VOC family protein	1.49725
cds2570	WP_016732818.1	Cromosoma	homogentisate 1%2C2-dioxygenase	1.11141
cds2571	WP_016732819.1	Cromosoma	FAA hydrolase family protein	1.83822
cds2572	WP_016732820.1	Cromosoma	maleylacetoacetate isomerase	1.5978
cds2573	WP_012483534.1	Cromosoma	MEKHLA domain-containing protein	1.40307
cds2591	WP_012483551.1	Cromosoma	3-oxoacyl-ACP reductase	5.70179
cds2592	WP_012483552.1	Cromosoma	TetR/AcrR family transcriptional regulator	6.38751
cds2593	WP_012483553.1	Cromosoma	FMN-dependent NADH-azoreductase	3.77782
cds2599	WP_016732838.1	Cromosoma	alanine dehydrogenase	1.38532
cds2600	WP_016732839.1	Cromosoma	DUF1203 domain-containing protein	2.25507
cds2617	WP_039750162.1	Cromosoma	ABC transporter substrate-binding protein	1.01418
cds2618	WP_012483575.1	Cromosoma	ANTAR domain-containing protein	1.47205
cds2646	WP_016732877.1	Cromosoma	hypothetical protein	1.105
cds2651	WP_016732883.1	Cromosoma	valine--tRNA ligase	1.1063
cds2655	WP_012483593.1	Cromosoma	exodeoxyribonuclease III	1.14548
cds2671	WP_004678848.1	Cromosoma	preprotein translocase subunit YajC	1.7463
cds2672	WP_016732899.1	Cromosoma	protein translocase subunit SecDF	1.20597
cds2676	WP_016732903.1	Cromosoma	FADH(2)-oxidizing methylenetetrahydrofolate--tRNA-(uracil(54)-C(5))-methyltransferase TrmFO	1.58453
cds2677	WP_004678841.1	Cromosoma	DUF1127 domain-containing protein	1.76399
cds2678	WP_004678838.1	Cromosoma	DUF1127 domain-containing protein	2.07086
cds2681	WP_004678834.1	Cromosoma	trigger factor	2.8879
cds2705	WP_004671258.1	Cromosoma	NADH:ubiquinone oxidoreductase subunit NDUFA12	1.10342
cds2742	WP_010024961.1	Cromosoma	zinc-finger domain-containing protein	1.11818
cds2758	WP_008526906.1	Cromosoma	30S ribosomal protein S2	4.22089
cds2759	WP_009994369.1	Cromosoma	elongation factor Ts	3.69324
cds2760	WP_004678616.1	Cromosoma	UMP kinase	1.16894
cds2790	WP_012483692.1	Cromosoma	CinA family protein	1.01975
cds2791	WP_016732968.1	Cromosoma	bifunctional 2-C-methyl-D-erythritol 4-phosphate cytidylyltransferase/2-C-methyl-D-erythritol 2%2C4-cyclodiphosphate synthase	1.43066
cds2792	WP_012483694.1	Cromosoma	tRNA dihydrouridine synthase DusB	2.03833
cds2793	WP_016732969.1	Cromosoma	two-component sensor histidine kinase	1.13421
cds2818	WP_029531170.1	Cromosoma	uroporphyrinogen-III C-methyltransferase	1.11674
cds2820	WP_016732974.1	Cromosoma	nitrite/sulfite reductase	1.04914
cds2823	WP_016732977.1	Cromosoma	AEC family transporter	1.05726
cds2833	gbkey=CDS	Cromosoma	LysR family transcriptional regulator	1.51623
cds2834	WP_016732989.1	Cromosoma	ABC transporter ATP-binding protein	1.58139
cds2839	WP_016732994.1	Cromosoma	hypothetical protein	1.64703
cds2840	WP_016732995.1	Cromosoma	FAD-binding protein	1.22787
cds2841	WP_016732996.1	Cromosoma	MarR family transcriptional regulator	1.20938
cds2844	WP_016732999.1	Cromosoma	gfo/Idh/MocA family oxidoreductase	1.41851
cds2849	WP_046977064.1	Cromosoma	ABC transporter ATP-binding protein	1.35509
cds2850	gbkey=CDS	Cromosoma	5-dehydro-4-deoxyglucarate dehydratase	1.09742
cds2853	WP_016733006.1	Cromosoma	ABC transporter substrate-binding protein	1.06589
cds2854	WP_012483752.1	Cromosoma	ABC transporter permease	1.44435
cds2869	WP_016733019.1	Cromosoma	efflux RND transporter periplasmic adaptor subunit	1.44946
cds2880	WP_004673778.1	Cromosoma	sugar ABC transporter substrate-binding protein	4.01246
cds2881	WP_020465354.1	Cromosoma	sugar ABC transporter ATP-binding protein	3.4587
cds2882	WP_016733027.1	Cromosoma	ABC transporter permease	1.11062
cds2885	WP_016733029.1	Cromosoma	bifunctional UDP-N-acetylglucosamine diphosphorylase/glucosamine-1-phosphate N-acetyltransferase GlmU	1.05454
cds2886	WP_016733030.1	Cromosoma	glutamine--fructose-6-phosphate transaminase (isomerizing)	2.09293
cds2889	WP_004680228.1	Cromosoma	succinate dehydrogenase assembly factor 2 family protein	1.91718
cds2896	WP_004680220.1	Cromosoma	invasion associated locus B family protein	1.40113
cds2907	WP_016733043.1	Cromosoma	hypothetical protein	2.35134
cds2908	WP_004671912.1	Cromosoma	pantetheine-phosphate adenylyltransferase	2.09926
cds2915	WP_016733047.1	Cromosoma	beta-ketoacyl-[acyl-carrier-protein] synthase II	2.72977
cds2916	WP_029531198.1	Cromosoma	transcriptional regulator	3.90114
cds2942	WP_016733073.1	Cromosoma	GntR family transcriptional regulator	1.5301
cds2943	WP_016733074.1	Cromosoma	agmatinase	2.11472
cds2959	WP_004671683.1	Cromosoma	membrane protein	1.51382
cds2961	WP_016733089.1	Cromosoma	TatD family deoxyribonuclease	1.36112
cds2962	WP_016733090.1	Cromosoma	methionine--tRNA ligase	1.25555
cds2972	WP_016733100.1	Cromosoma	LysR family transcriptional regulator	1.08042
cds2973	WP_010025202.1	Cromosoma	alkylphosphonate uptake protein	1.15554
cds2979	WP_016733104.1	Cromosoma	peptidyl-prolyl cis-trans isomerase	1.09142
cds2985	WP_016733108.1	Cromosoma	ATP-dependent helicase	3.28825
cds2989	WP_016733112.1	Cromosoma	citrate synthase/methylcitrate synthase	3.57522
cds2990	WP_016733113.1	Cromosoma	CTP synthase	1.37089
cds2991	WP_016733114.1	Cromosoma	preprotein translocase subunit SecG	2.27769
cds2992	WP_016733115.1	Cromosoma	triose-phosphate isomerase	1.15601
cds2996	WP_004674119.1	Cromosoma	hypothetical protein	2.34485
cds3019	WP_016734499.1	Cromosoma	SulP family inorganic anion transporter	1.38483
cds3020	WP_010058543.1	Cromosoma	carbonic anhydrase	1.25662
cds3027	WP_016734492.1	Cromosoma	cytochrome c	1.29529
cds3028	WP_016734491.1	Cromosoma	LpqC%2C poly	1.66134
cds3055	WP_016734475.1	Cromosoma	DegQ family serine endoprotease	2.39855
cds3070	WP_016734463.1	Cromosoma	Rrf2 family transcriptional regulator	1.33476
cds3071	WP_012483072.1	Cromosoma	hypothetical protein	1.89183
cds3072	WP_010022588.1	Cromosoma	hypothetical protein	1.87028
cds3076	WP_046977107.1	Cromosoma	betaine-aldehyde dehydrogenase	1.17855
cds3077	WP_012483077.1	Cromosoma	transcriptional regulator BetI	1.34408
cds3084	WP_016734456.1	Cromosoma	transcriptional regulator	1.44163
cds3087	WP_016734453.1	Cromosoma	DeoR/GlpR transcriptional regulator	3.69028
cds3088	WP_016734452.1	Cromosoma	hypothetical protein	2.41253
cds3112	WP_004676036.1	Cromosoma	cold-shock protein	2.23829
cds3113	WP_016734430.1	Cromosoma	hypothetical protein	2.24162
cds3114	WP_016734429.1	Cromosoma	30S ribosomal protein S21	1.93466
cds3117	WP_004676027.1	Cromosoma	organic hydroperoxide resistance protein	1.02626
cds3118	WP_029531569.1	Cromosoma	MarR family transcriptional regulator	3.80202
cds3119	WP_010017118.1	Cromosoma	DUF899 domain-containing protein	2.27222
cds3120	WP_016734425.1	Cromosoma	DUF1579 domain-containing protein	1.25902
cds3124	WP_016734422.1	Cromosoma	ABC transporter ATP-binding protein	1.09727
cds3144	WP_029531567.1	Cromosoma	glutathione S-transferase	2.27165
cds3145	WP_010025457.1	Cromosoma	TetR/AcrR family transcriptional regulator	1.78053
cds3146	WP_016734407.1	Cromosoma	MFS transporter	1.24778
cds3147	WP_016734406.1	Cromosoma	nuclear transport factor 2 family protein	1.63198
cds3173	WP_029531565.1	Cromosoma	glyoxalase	1.07716
cds3216	WP_046977117.1	Cromosoma	PLP-dependent aminotransferase family protein	1.18174
cds3217	WP_016734352.1	Cromosoma	DUF983 domain-containing protein	2.1934
cds3218	WP_016734351.1	Cromosoma	LysR family transcriptional regulator	2.96226
cds3225	WP_016734345.1	Cromosoma	MFS transporter	1.88678
cds3226	WP_004670343.1	Cromosoma	hypothetical protein	1.94161
cds3227	WP_012483203.1	Cromosoma	DNA-binding response regulator	1.31498
cds3230	WP_016734344.1	Cromosoma	c-type cytochrome biogenesis protein CcmI	1.74992
cds3235	WP_012483209.1	Cromosoma	PDZ domain-containing protein	4.08202
cds3236	WP_037113567.1	Cromosoma	DNA-binding response regulator	3.15559
cds3237	WP_012483211.1	Cromosoma	sensor histidine kinase	1.67527
cds3244	WP_010035016.1	Cromosoma	hypothetical protein	3.04056
cds3247	WP_016734334.1	Cromosoma	AcrB/AcrD/AcrF family protein	1.53018
cds3248	WP_016734333.1	Cromosoma	efflux RND transporter periplasmic adaptor subunit	2.00543
cds3254	WP_039751042.1	Cromosoma	Lrp/AsnC family transcriptional regulator	1.8674
cds3255	WP_016734328.1	Cromosoma	magnesium transporter	1.12895
cds3265	WP_016734320.1	Cromosoma	membrane protein	1.55536
cds3272	WP_010009317.1	Cromosoma	hypothetical protein	1.67233
cds3299	WP_003574261.1	Cromosoma	DNA-directed RNA polymerase subunit omega	1.79475
cds3301	WP_004675049.1	Cromosoma	DUF3563 domain-containing protein	3.30459
cds3302	WP_012483260.1	Cromosoma	DUF2062 domain-containing protein	2.20314
cds3312	WP_029531551.1	Cromosoma	HD domain-containing protein	1.11479
cds3335	WP_016734272.1	Cromosoma	hypothetical protein	2.02737
cds3341	WP_016734266.1	Cromosoma	GFA family protein	1.26506
cds3342	WP_016734265.1	Cromosoma	hypothetical protein	1.7425
cds3343	WP_016734264.1	Cromosoma	cysteine--tRNA ligase	1.86734
cds3352	WP_016734256.1	Cromosoma	50S ribosomal protein L9	2.29398
cds3353	WP_016734255.1	Cromosoma	DUF2232 domain-containing protein	1.35964
cds3354	WP_004680498.1	Cromosoma	30S ribosomal protein S18	4.38892
cds3355	WP_004680499.1	Cromosoma	30S ribosomal protein S6	4.7695
cds3358	WP_016734253.1	Cromosoma	[acyl-carrier-protein] S-malonyltransferase	1.24028
cds3384	WP_029531544.1	Cromosoma	ABC transporter ATP-binding protein	1.52916
cds3388	WP_004680549.1	Cromosoma	nucleoside-diphosphate kinase	2.17396
cds3389	WP_016734230.1	Cromosoma	hypothetical protein	3.01998
cds3390	WP_016734229.1	Cromosoma	hypothetical protein	3.21625
cds3391	WP_046977115.1	Cromosoma	branched-chain amino acid ABC transporter permease	2.04465
cds3397	WP_016734222.1	Cromosoma	short chain dehydrogenase	1.05274
cds3400	WP_016734220.1	Cromosoma	23S rRNA (adenine(2030)-N(6))-methyltransferase RlmJ	1.13813
cds3401	WP_046977116.1	Cromosoma	molybdopterin oxidoreductase family protein	1.02299
cds3402	WP_012483336.1	Cromosoma	NUDIX domain-containing protein	1.06395
cds3403	WP_029531540.1	Cromosoma	alpha-D-ribose 1-methylphosphonate 5-triphosphate diphosphatase	1.23212
cds3404	WP_016734217.1	Cromosoma	phosphoribosylglycinamide formyltransferase	1.64809
cds3405	WP_016734216.1	Cromosoma	phosphoribosylformylglycinamidine cyclo-ligase	2.11418
cds3409	WP_004673739.1	Cromosoma	exopolyphosphatase	1.00217
cds3413	WP_029531538.1	Cromosoma	multicopper oxidase family protein	1.63102
cds3415	WP_029531536.1	Cromosoma	aspartate--tRNA ligase	2.77544
cds3423	WP_016734203.1	Cromosoma	EamA/RhaT family transporter	1.01341
cds3426	WP_016734201.1	Cromosoma	porphobilinogen synthase	1.62059
cds3441	WP_012483354.1	Cromosoma	serine hydroxymethyltransferase	1.46742
cds3442	WP_003547190.1	Cromosoma	transcriptional regulator NrdR	1.00283
cds3457	WP_016734173.1	Cromosoma	hypothetical protein	2.50713
cds3458	WP_004674116.1	Cromosoma	6%2C7-dimethyl-8-ribityllumazine synthase	1.6905
cds3459	WP_010018343.1	Cromosoma	N utilization substance protein B	1.09957
cds3484	WP_046977121.1	Cromosoma	2-isopropylmalate synthase	2.08491
cds3493	WP_016733738.1	Cromosoma	anthranilate synthase component I	1.04419
cds3527	WP_012484718.1	Cromosoma	MarR family transcriptional regulator	1.2104
cds3528	WP_012484719.1	Cromosoma	ribosome biogenesis GTPase Der	1.48742
cds3529	WP_016733755.1	Cromosoma	membrane protein	2.32926
cds3531	WP_016733756.1	Cromosoma	polysaccharide deacetylase	1.26617
cds3534	WP_012484723.1	Cromosoma	PadR family transcriptional regulator	4.31583
cds3535	WP_029531442.1	Cromosoma	hypothetical protein	1.92775
cds3569	WP_016733789.1	Cromosoma	5-methylaminomethyl-2-thiouridine methyltransferase	1.23101
cds3572	WP_016733791.1	Cromosoma	MFS transporter	2.34297
cds3573	WP_016733792.1	Cromosoma	dihydrodipicolinate synthase family protein	6.5881
cds3576	WP_029531450.1	Cromosoma	RNA helicase	3.64637
cds3577	WP_016733796.1	Cromosoma	EamA/RhaT family transporter	1.78865
cds3583	WP_012484826.1	Cromosoma	dihydroxy-acid dehydratase	1.06564
cds3584	WP_016733800.1	Cromosoma	aldehyde dehydrogenase family protein	1.05736
cds3591	WP_016733803.1	Cromosoma	hypothetical protein	1.28775
cds3593	WP_016733805.1	Cromosoma	ROK family transcriptional regulator	1.4351
cds3622	WP_011426430.1	Cromosoma	UDP-glucose 4-epimerase	1.5083
cds3623	WP_016733829.1	Cromosoma	glycosyl transferase	1.41656
cds3669	WP_029531474.1	Cromosoma	dioxygenase	1.34451
cds3696	WP_012484941.1	Cromosoma	hypothetical protein	1.71318
cds3698	WP_016733885.1	Cromosoma	hemin-degrading factor	1.57883
cds3708	WP_016733890.1	Cromosoma	FAD-binding protein	1.09309
cds3709	WP_016733891.1	Cromosoma	NAD-dependent dihydropyrimidine dehydrogenase subunit PreA	2.6265
cds3710	WP_080956157.1	Cromosoma	hypothetical protein	3.02163
cds3731	WP_016733912.1	Cromosoma	NAD(P)-dependent alcohol dehydrogenase	1.46571
cds3737	WP_016733917.1	Cromosoma	DUF559 domain-containing protein	1.63955
cds3738	WP_016733918.1	Cromosoma	dihydropyrimidinase	2.67635
cds3740	WP_004673032.1	Cromosoma	ABC transporter ATP-binding protein	1.93292
cds3741	WP_016733919.1	Cromosoma	ABC transporter permease	1.0168
cds3767	WP_004675671.1	Cromosoma	branched-chain amino acid ABC transporter substrate-binding protein	1.00628
cds3769	WP_037116131.1	Cromosoma	ABC transporter ATP-binding protein	1.14705
cds3787	WP_004675735.1	Cromosoma	hypothetical protein	1.96872
cds3788	WP_029531492.1	Cromosoma	RluA family pseudouridine synthase	1.45058
cds3789	WP_012484996.1	Cromosoma	RNA polymerase sigma factor RpoH	1.0774
cds3796	WP_016733946.1	Cromosoma	multidrug efflux RND transporter permease subunit	1.92683
cds3797	WP_004675748.1	Cromosoma	MexE family multidrug efflux RND transporter periplasmic adaptor subunit	2.59997
cds3798	WP_029531493.1	Cromosoma	alpha/beta hydrolase	2.68968
cds3804	WP_016733951.1	Cromosoma	EmrB/QacA family drug resistance transporter	2.18214
cds3805	WP_016733952.1	Cromosoma	HlyD family secretion protein	3.52476
cds3806	WP_016733953.1	Cromosoma	MarR family transcriptional regulator	4.04941
cds3823	WP_016733965.1	Cromosoma	sugar ABC transporter permease	1.20314
cds3824	WP_011426608.1	Cromosoma	carbohydrate ABC transporter permease	1.07818
cds3825	WP_016733966.1	Cromosoma	SIS domain-containing protein	1.50229
cds3852	WP_016737122.1	Cromosoma	phosphoribosyltransferase	1.0096
cds3856	WP_012485052.1	Cromosoma	efflux RND transporter periplasmic adaptor subunit	1.55619
cds3857	WP_016737126.1	Cromosoma	multidrug efflux RND transporter permease subunit	1.1209
cds3859	WP_016737128.1	Cromosoma	LacI family transcriptional regulator	1.56416
cds3860	WP_016737129.1	Cromosoma	ABC transporter substrate-binding protein	1.48834
cds3866	WP_016737135.1	Cromosoma	amidohydrolase	1.53376
cds3867	WP_016737136.1	Cromosoma	tripartite tricarboxylate transporter permease	2.45141
cds3868	WP_004672369.1	Cromosoma	tripartite tricarboxylate transporter TctB family protein	1.0362
cds3894	WP_012485090.1	Cromosoma	phosphoglucosamine mutase	1.92926
cds3904	WP_004671619.1	Cromosoma	tol-pal system-associated acyl-CoA thioesterase	1.03554
cds3912	WP_012485106.1	Cromosoma	YebC/PmpR family DNA-binding transcriptional regulator	1.60056
cds3925	WP_016737177.1	Cromosoma	bifunctional lysylphosphatidylglycerol flippase/synthetase MprF	1.35342
cds3946	WP_003566413.1	Cromosoma	50S ribosomal protein L31	4.06275
cds3947	WP_029532180.1	Cromosoma	ABC transporter	1.1035
cds3954	WP_012485142.1	Cromosoma	inositol monophosphatase	3.17617
cds3971	WP_016737204.1	Cromosoma	thiamine phosphate synthase	1.27429
cds3975	WP_010028538.1	Cromosoma	DUF465 domain-containing protein	1.54631
cds3978	WP_003582204.1	Cromosoma	50S ribosomal protein L36	3.08105
cds3992	WP_003585771.1	Cromosoma	DUF2312 domain-containing protein	1.67509
cds4000	WP_016737223.1	Cromosoma	homospermidine synthase	1.63719
cds4009	WP_004677699.1	Cromosoma	RNA polymerase sigma factor RpoD	1.0582
cds4015	gbkey=CDS	Cromosoma	hypothetical protein	3.57643
cds4016	WP_012484605.1	Cromosoma	hypothetical protein	2.1768
cds4017	WP_012484606.1	Cromosoma	GatB/YqeY domain-containing protein	1.22213
cds4018	WP_012484607.1	Cromosoma	carbamoyl-phosphate synthase small subunit	1.91608
cds4022	WP_010003937.1	Cromosoma	antibiotic biosynthesis monooxygenase	1.21696
cds4023	WP_012484610.1	Cromosoma	MATE family efflux transporter	1.17875
cds4029	WP_016733674.1	Cromosoma	carbamoyl-phosphate synthase large subunit	2.27922
cds4032	WP_004672775.1	Cromosoma	transcription elongation factor GreA	1.77268
cds4033	WP_029531415.1	Cromosoma	glycosyltransferase family 1 protein	1.37397
cds4034	WP_012484619.1	Cromosoma	C4-dicarboxylate transporter	2.7036
cds4035	WP_080956164.1	Cromosoma	sensor histidine kinase	1.73528
cds4036	WP_016733681.1	Cromosoma	sigma-54-dependent Fis family transcriptional regulator	1.09001
cds4037	WP_029531418.1	Cromosoma	Lrp/AsnC family transcriptional regulator	1.487
cds4040	WP_029531419.1	Cromosoma	transcriptional regulator	2.90885
cds4041	WP_029531421.1	Cromosoma	alkene reductase	1.33556
cds4048	WP_016733690.1	Cromosoma	hypothetical protein	1.23602
cds4049	WP_029531422.1	Cromosoma	galactosyltransferase	1.90845
cds4050	WP_012484631.1	Cromosoma	pyridoxal phosphate-dependent aminotransferase	1.34182
cds4058	WP_029531425.1	Cromosoma	BA14K family protein	1.50618
cds4076	WP_004680140.1	Cromosoma	ribose-phosphate pyrophosphokinase	1.28951
cds4078	WP_012484653.1	Cromosoma	50S ribosomal protein L25	1.5352
cds4084	WP_010031314.1	Cromosoma	redox-regulated ATPase YchF	1.25349
cds4091	WP_012484665.1	Cromosoma	ubiquinol-cytochrome c reductase iron-sulfur subunit	1.7665
cds4092	WP_016733714.1	Cromosoma	endonuclease	1.58912
cds4093	WP_016733715.1	Cromosoma	ABC transporter ATP-binding protein	1.16875
cds4094	WP_012484668.1	Cromosoma	CopG family transcriptional regulator	2.6356
cds4095	WP_004680105.1	Cromosoma	ABC transporter ATP-binding protein	1.03016
cds4117	WP_016733591.1	Cromosoma	50S ribosomal protein L11 methyltransferase	1.38776
cds4118	WP_016733592.1	Cromosoma	SCO family protein	1.09386
cds4128	WP_004668803.1	Cromosoma	UDP-3-O-acyl-N-acetylglucosamine deacetylase	2.50246
cds4162	WP_016733612.1	Cromosoma	methylenetetrahydrofolate reductase [NAD(P)H]	2.19214
cds4164	WP_004668527.1	Cromosoma	energy-dependent translational throttle protein EttA	1.24937
cds4172	WP_016733618.1	Cromosoma	DUF4432 domain-containing protein	1.40339
cds4179	WP_016733622.1	Cromosoma	N-formylglutamate amidohydrolase	1.92864
cds4185	WP_012484541.1	Cromosoma	ABC transporter ATP-binding protein	2.96809
cds4186	WP_012484542.1	Cromosoma	gfo/Idh/MocA family oxidoreductase	3.30854
cds4187	WP_012484543.1	Cromosoma	carbohydrate ABC transporter permease	2.53928
cds4188	WP_016733625.1	Cromosoma	sugar ABC transporter permease	2.09561
cds4189	WP_016733626.1	Cromosoma	carbohydrate ABC transporter substrate-binding protein	2.4804
cds4190	WP_016733627.1	Cromosoma	hypothetical protein	2.72758
cds4191	WP_016733628.1	Cromosoma	N-acetylglucosamine kinase	2.75844
cds4192	WP_016733629.1	Cromosoma	GntR family transcriptional regulator	1.9581
cds4195	WP_029531404.1	Cromosoma	methionine synthase	2.64493
cds4216	WP_016733643.1	Cromosoma	hypothetical protein	2.60391
cds4228	WP_016733655.1	Cromosoma	hypothetical protein	1.09611
cds4229	WP_029531410.1	Cromosoma	YjbQ family protein	1.70762
cds4249	gbkey=CDS	Cromosoma	ABC transporter ATP-binding protein	1.09725
cds4255	WP_016733518.1	Cromosoma	PLP-dependent aminotransferase family protein	1.30647
cds4271	WP_016733533.1	Cromosoma	ABC transporter permease	1.23544
cds4272	WP_039750664.1	Cromosoma	glycerol-3-phosphate transporter permease	1.5413
cds4273	WP_016733534.1	Cromosoma	ABC transporter substrate-binding protein	2.10908
cds4274	WP_016733535.1	Cromosoma	sn-glycerol-3-phosphate import ATP-binding protein UgpC	2.20876
cds4275	WP_016733536.1	Cromosoma	sugar-binding transcriptional regulator	1.59848
cds4282	WP_016733540.1	Cromosoma	NAD(P)/FAD-dependent oxidoreductase	1.03601
cds4286	WP_016733543.1	Cromosoma	aspartate/glutamate racemase family protein	2.32664
cds4287	WP_016733544.1	Cromosoma	GNAT family N-acetyltransferase	4.32067
cds4288	WP_016733545.1	Cromosoma	TetR/AcrR family transcriptional regulator	2.44511
cds4289	WP_016733546.1	Cromosoma	MFS transporter	1.04736
cds4311	WP_004677216.1	Cromosoma	acetolactate synthase small subunit	1.76576
cds4312	WP_016733560.1	Cromosoma	acetolactate synthase 3 large subunit	2.45091
cds4317	WP_029531389.1	Cromosoma	tRNA (adenosine(37)-N6)-dimethylallyltransferase MiaA	1.26504
cds4339	WP_016733575.1	Cromosoma	AcrB/AcrD/AcrF family protein	1.02
cds4340	WP_016733576.1	Cromosoma	efflux RND transporter periplasmic adaptor subunit	1.77365
cds4362	WP_029531319.1	Cromosoma	excinuclease ABC subunit UvrB	1.10204
cds4367	WP_003540801.1	Cromosoma	cold-shock protein	1.06773
cds4379	WP_016733387.1	Cromosoma	DNA-binding response regulator	1.35318
cds4380	WP_029531333.1	Cromosoma	hypothetical protein	2.59204
cds4381	WP_012484239.1	Cromosoma	transcriptional regulator	3.26973
cds4382	WP_029531336.1	Cromosoma	dihydrofolate reductase	5.28412
cds4383	WP_016733389.1	Cromosoma	hypothetical protein	1.59072
cds4390	WP_012484248.1	Cromosoma	transcriptional regulator	1.89211
cds4403	WP_029531341.1	Cromosoma	4-hydroxy-tetrahydrodipicolinate reductase	1.08645
cds4414	WP_012484272.1	Cromosoma	protocatechuate 3%2C4-dioxygenase	2.68247
cds4418	WP_010024558.1	Cromosoma	hypothetical protein	2.78007
cds4419	WP_012484275.1	Cromosoma	hypothetical protein	2.14956
cds4434	WP_029531346.1	Cromosoma	metal-dependent hydrolase	1.25368
cds4472	WP_016733455.1	Cromosoma	IMP dehydrogenase	1.18308
cds4497	WP_012484348.1	Cromosoma	flavin-dependent oxidoreductase	1.16514
cds4500	WP_016733477.1	Cromosoma	ArsR family transcriptional regulator	1.09314
cds4501	WP_046977140.1	Cromosoma	adenylate/guanylate cyclase domain-containing protein	1.44819
cds4514	WP_016733488.1	Cromosoma	TetR/AcrR family transcriptional regulator	1.03804
cds4515	WP_016733489.1	Cromosoma	membrane protein	1.05806
cds4521	WP_029531365.1	Cromosoma	hypothetical protein	1.44859
cds4523	WP_046977141.1	Cromosoma	hypothetical protein	2.17862
cds4525	WP_004679676.1	Cromosoma	transcriptional repressor	1.07733
cds4526	WP_012484378.1	Cromosoma	zinc ABC transporter permease	1.55714
cds4527	WP_016733499.1	Cromosoma	metal ABC transporter ATP-binding protein	1.90394
cds4529	WP_016733501.1	Cromosoma	GTP-binding protein	2.79893
cds4530	WP_080956170.1	Cromosoma	hypothetical protein	3.52353
cds4531	WP_016733502.1	Cromosoma	membrane protein	3.364
cds4532	gbkey=CDS	Cromosoma	cobaltochelatase subunit CobN	1.07161
cds4557	WP_012484172.1	Cromosoma	ArsR family transcriptional regulator	1.02809
cds4572	WP_016733355.1	Cromosoma	DUF1442 domain-containing protein	2.81792
cds4573	WP_016733357.1	Cromosoma	siderophore-interacting protein	1.52685
cds4585	WP_016733366.1	Cromosoma	DUF1800 domain-containing protein	1.02187
cds4586	WP_004672825.1	Cromosoma	membrane protein	1.35116
cds4597	WP_004677801.1	Cromosoma	glutamate synthase subunit beta	1.35422
cds4598	WP_016737236.1	Cromosoma	glutamate synthase large subunit	1.81041
cds4600	WP_004677809.1	Cromosoma	LysR family transcriptional regulator	1.86006
cds4601	WP_016737238.1	Cromosoma	bile acid:sodium symporter	2.51132
cds4603	WP_012485198.1	Cromosoma	alpha/beta hydrolase	1.39266
cds4607	WP_020465417.1	Cromosoma	hypothetical protein	2.48704
cds4608	WP_080956137.1	Cromosoma	hypothetical protein	1.24547
cds4627	WP_016737254.1	Cromosoma	hypothetical protein	1.04332
cds4645	WP_003585885.1	Cromosoma	30S ribosomal protein S21	2.50947
cds4668	WP_016737286.1	Cromosoma	N-acetyltransferase	1.07156
cds4676	WP_016737294.1	Cromosoma	ketohydroxyglutarate aldolase	1.68849
cds4679	WP_029532244.1	Cromosoma	rhodanese domain-containing protein	1.79424
cds4687	WP_016737300.1	Cromosoma	sugar ABC transporter ATP-binding protein	1.83514
cds4688	WP_016737301.1	Cromosoma	LacI family transcriptional regulator	1.05079
cds4690	WP_016737303.1	Cromosoma	xylulokinase	1.39782
cds4691	WP_029532252.1	Cromosoma	LacI family DNA-binding transcriptional regulator	2.12493
cds4692	WP_016737305.1	Cromosoma	MFS transporter	1.72581
cds4693	WP_012485276.1	Cromosoma	HlyD family secretion protein	1.54743
cds4695	WP_016737306.1	Cromosoma	AraC family transcriptional regulator	1.08475
cds4697	WP_016737308.1	Cromosoma	glutamate--tRNA ligase	1.60997
cds4702	WP_012485284.1	Cromosoma	ABC transporter ATP-binding protein	3.27899
cds4703	WP_012485285.1	Cromosoma	ABC transporter permease	2.44023
cds4704	WP_004678022.1	Cromosoma	ABC transporter permease	1.84574
cds4715	WP_016737317.1	Cromosoma	TetR/AcrR family transcriptional regulator	1.57964
cds4730	WP_016737327.1	Cromosoma	AcrB/AcrD/AcrF family protein	1.99105
cds4731	WP_016737328.1	Cromosoma	efflux RND transporter periplasmic adaptor subunit	2.01324
cds4737	WP_016737332.1	Cromosoma	L-arabinose ABC transporter ATP-binding protein AraG	2.40251
cds4738	WP_016737333.1	Cromosoma	arabinose ABC transporter substrate-binding protein	3.2114
cds4739	WP_029532271.1	Cromosoma	FadR family transcriptional regulator	2.29906
cds4740	WP_016737335.1	Cromosoma	galactonate dehydratase	1.81972
cds4753	WP_016737530.1	Cromosoma	7-cyano-7-deazaguanine synthase QueC	2.18792
cds4754	WP_016737529.1	Cromosoma	6-carboxytetrahydropterin synthase QueD	2.01037
cds4784	WP_012485357.1	Cromosoma	DUF4167 domain-containing protein	1.61296
cds4788	WP_004671807.1	Cromosoma	aspartate kinase	2.1115
cds4807	WP_012485375.1	Cromosoma	TetR/AcrR family transcriptional regulator	1.19087
cds4808	WP_012485376.1	Cromosoma	MFS transporter	2.40506
cds4827	WP_012485393.1	Cromosoma	argininosuccinate lyase	1.92629
cds4832	WP_004671390.1	Cromosoma	hypoxanthine phosphoribosyltransferase	1.40725
cds4849	WP_004679586.1	Cromosoma	50S ribosomal protein L28	3.96154
cds4850	WP_016736456.1	Cromosoma	membrane protein	4.03437
cds4851	WP_016736455.1	Cromosoma	adenylate kinase	1.02113
cds4853	WP_016736453.1	Cromosoma	cobaltochelatase subunit CobT	1.27771
cds4855	WP_004679597.1	Cromosoma	molecular chaperone DnaJ	1.10274
cds4898	WP_016736408.1	Cromosoma	sugar ABC transporter substrate-binding protein	1.43605
cds4899	WP_016736406.1	Cromosoma	LacI family transcriptional regulator	3.61489
cds4905	WP_016736403.1	Cromosoma	arginase	3.41439
cds4906	WP_012485447.1	Cromosoma	ornithine--oxo-acid transaminase	4.95327
cds4912	WP_016736401.1	Cromosoma	formate dehydrogenase subunit alpha	1.09901
cds4913	WP_016736400.1	Cromosoma	formate dehydrogenase subunit beta	1.144
cds4928	WP_016736393.1	Cromosoma	ATP synthase subunit gamma	1.29849
cds4929	WP_016736392.1	Cromosoma	ATP synthase subunit alpha	1.99069
cds4930	WP_016736391.1	Cromosoma	F0F1 ATP synthase subunit delta	2.39562
cds4939	WP_012485476.1	Cromosoma	cytochrome b	2.72426
cds4942	WP_016736382.1	Cromosoma	hypothetical protein	1.09949
cds4944	WP_016736380.1	Cromosoma	dihydrolipoyllysine-residue succinyltransferase	1.21396
cds4946	WP_012485483.1	Cromosoma	2-oxoglutarate dehydrogenase E1 component	1.28911
cds4947	WP_016736377.1	Cromosoma	succinate--CoA ligase subunit alpha	1.3215
cds4964	WP_016736360.1	Cromosoma	tRNA (adenosine(37)-N6)-threonylcarbamoyltransferase complex transferase subunit TsaD	1.19767
cds4976	WP_012485506.1	Cromosoma	translational GTPase TypA	3.73592
cds4980	WP_016736350.1	Cromosoma	NUDIX hydrolase	2.46234
cds4981	WP_016736349.1	Cromosoma	hypothetical protein	6.42921
cds4982	WP_016736348.1	Cromosoma	adenylosuccinate synthase	5.2504
cds4987	WP_016736344.1	Cromosoma	ABC transporter ATP-binding protein	1.5697
cds4988	WP_016736343.1	Cromosoma	ABC transporter permease	1.5791
cds4989	WP_016736342.1	Cromosoma	ABC transporter substrate-binding protein	2.3918
cds4990	WP_012485518.1	Cromosoma	23S rRNA (adenine(2503)-C(2))-methyltransferase RlmN	2.24235
cds4993	WP_012485520.1	Cromosoma	RNA polymerase sigma factor RpoE	1.08488
cds5008	WP_029531880.1	Cromosoma	heme transporter HemC	1.85524
cds5009	WP_016736335.1	Cromosoma	heme exporter protein CcmD	2.20746
cds5017	gbkey=CDS	Cromosoma	hypothetical protein	2.75561
cds5023	WP_012485544.1	Cromosoma	50S ribosomal protein L19	3.70246
cds5026	WP_016736326.1	Cromosoma	3-isopropylmalate dehydratase large subunit	2.15135
cds5059	WP_016736306.1	Cromosoma	ABC transporter ATP-binding protein	1.04061
cds5079	WP_029531871.1	Cromosoma	polyprenyl synthetase family protein	1.38873
cds5083	WP_003543812.1	Cromosoma	50S ribosomal protein L32	4.31771
cds5092	WP_011427210.1	Cromosoma	ferredoxin family protein	1.95464
cds5096	WP_012485601.1	Cromosoma	MFS transporter	1.67555
cds5098	WP_012485603.1	Cromosoma	thiamine diphosphokinase	1.14961
cds5099	WP_016736284.1	Cromosoma	ABC transporter ATP-binding protein	1.20946
cds5101	WP_004674197.1	Cromosoma	homoserine O-succinyltransferase	1.04168
cds5103	WP_012485607.1	Cromosoma	GntR family transcriptional regulator	1.8291
cds5104	WP_016736281.1	Cromosoma	SIS domain-containing protein	2.81199
cds5105	WP_016736280.1	Cromosoma	N-acetylglucosamine-6-phosphate deacetylase	2.93067
cds5106	WP_016736279.1	Cromosoma	sugar isomerase domain-containing protein	2.28079
cds5107	WP_016736278.1	Cromosoma	FAD-binding oxidoreductase	1.47359
cds5112	WP_008528334.1	Cromosoma	elongation factor P	2.62336
cds5113	WP_016736273.1	Cromosoma	EF-P lysine aminoacylase GenX	1.19127
cds5114	WP_016736272.1	Cromosoma	lysine-2%2C3-aminomutase-like protein	1.01267
cds5124	WP_016736264.1	Cromosoma	LysR family transcriptional regulator	1.26189
cds5128	WP_016736260.1	Cromosoma	iron ABC transporter substrate-binding protein	1.92054
cds5129	WP_016736259.1	Cromosoma	iron ABC transporter permease	2.0489
cds5133	WP_016736256.1	Cromosoma	NIPSNAP family protein	2.49006
cds5134	WP_016736255.1	Cromosoma	TetR/AcrR family transcriptional regulator	2.86914
cds5135	WP_016736254.1	Cromosoma	50S ribosomal protein L21	2.63107
cds5136	WP_004676172.1	Cromosoma	50S ribosomal protein L27	2.56432
cds5137	WP_012485632.1	Cromosoma	N-acetyltransferase	1.99693
cds5138	WP_016736253.1	Cromosoma	N-acetyltransferase	1.40897
cds5139	WP_016736252.1	Cromosoma	endonuclease	1.13232
cds5155	WP_080956143.1	Cromosoma	(2Fe-2S)-binding protein	1.13158
cds5158	WP_004675276.1	Cromosoma	Zn-dependent protease	1.24031
cds5159	WP_010023100.1	Cromosoma	DUF1737 domain-containing protein	1.32235
cds5163	WP_029531862.1	Cromosoma	3-isopropylmalate dehydratase small subunit	1.05815
cds5165	WP_010024973.1	Cromosoma	3-isopropylmalate dehydrogenase	1.98503
cds5172	WP_029531858.1	Cromosoma	hypothetical protein	2.07165
cds5173	WP_016736226.1	Cromosoma	aspartate-semialdehyde dehydrogenase	2.03922
cds5177	WP_004675229.1	Cromosoma	pyridoxal kinase PdxY	1.19089
cds5181	WP_016736221.1	Cromosoma	bifunctional phosphoribosylaminoimidazolecarboxamide formyltransferase/IMP cyclohydrolase PurH	1.06576
cds5187	WP_010019544.1	Cromosoma	DUF1013 domain-containing protein	3.47293
cds5199	WP_008528706.1	Cromosoma	transcription termination factor Rho	1.8447
cds5208	WP_012482087.1	Cromosoma	protein-export protein SecB	1.04957
cds5222	WP_016736193.1	Cromosoma	phosphoribosylanthranilate isomerase	1.31043
cds5223	WP_016736192.1	Cromosoma	tryptophan synthase subunit beta	1.15144
cds5233	WP_016736183.1	Cromosoma	adenosylhomocysteinase	2.62989
cds5240	WP_012482113.1	Cromosoma	aminoacyl-tRNA hydrolase	1.05846
cds5250	WP_012482121.1	Cromosoma	imidazoleglycerol-phosphate dehydratase	1.82818
cds5253	WP_012482124.1	Cromosoma	DUF1402 domain-containing protein	1.13071
cds5271	WP_016735219.1	Cromosoma	LacI family transcriptional regulator	1.53342
cds5278	WP_016735212.1	Cromosoma	TetR/AcrR family transcriptional regulator	1.40596
cds5282	WP_039751506.1	Cromosoma	gfo/Idh/MocA family oxidoreductase	1.1565
cds5295	WP_012482163.1	Cromosoma	30S ribosomal protein S1	2.63604
cds5297	WP_012482165.1	Cromosoma	TIGR02300 family protein	2.94099
cds5298	WP_012482166.1	Cromosoma	excinuclease ABC subunit C	1.06007
cds5341	WP_016735158.1	Cromosoma	class I SAM-dependent methyltransferase	2.21885
cds5342	WP_016735157.1	Cromosoma	polyribonucleotide nucleotidyltransferase	1.81352
cds5343	WP_029531690.1	Cromosoma	30S ribosomal protein S15	2.21563
cds5345	WP_016735154.1	Cromosoma	tRNA pseudouridine(55) synthase TruB	2.1858
cds5346	WP_012482211.1	Cromosoma	ribosome-binding factor A	2.16835
cds5347	WP_016735153.1	Cromosoma	translation initiation factor IF-2	1.2166
cds5348	WP_029531275.1	Cromosoma	methyltransferase domain-containing protein	1.13878
cds5349	WP_016733253.1	Cromosoma	ABC transporter substrate-binding protein	1.01702
cds5354	WP_016733258.1	Cromosoma	transketolase	1.51542
cds5355	WP_016733259.1	Cromosoma	transketolase	2.04256
cds5356	WP_012484068.1	Cromosoma	ABC transporter permease	1.94927
cds5371	WP_016733273.1	Cromosoma	organic hydroperoxide resistance protein	2.25348
cds5374	WP_016733276.1	Cromosoma	alpha/beta hydrolase	1.78012
cds5383	WP_016733282.1	Cromosoma	S-adenosylmethionine-dependent methyltransferase	1.5458
cds5401	WP_016733295.1	Cromosoma	exopolysaccharide biosynthesis protein	1.11973
cds5404	WP_016733298.1	Cromosoma	nicotinate-nucleotide--dimethylbenzimidazole phosphoribosyltransferase	1.94172
cds5412	WP_016733305.1	Cromosoma	short chain dehydrogenase	1.55118
cds5413	WP_004678436.1	Cromosoma	ABC transporter permease	1.35183
cds5414	WP_016733306.1	Cromosoma	ABC transporter ATP-binding protein	2.0588
cds5449	WP_016733325.1	Cromosoma	membrane protein	1.35313
cds5451	end_range=100646,.	Cromosoma	cobaltochelatase subunit CobN	1.34504
cds5453	WP_016733208.1	Cromosoma	DUF1062 domain-containing protein	1.25515
cds5454	WP_008525884.1	Cromosoma	RNA polymerase-binding protein DksA	1.4559
cds5483	WP_029531262.1	Cromosoma	3-deoxy-7-phosphoheptulonate synthase	2.04328
cds5491	WP_016733231.1	Cromosoma	ABC transporter ATP-binding protein	1.23055
cds5492	WP_016733233.1	Cromosoma	3-deoxy-7-phosphoheptulonate synthase class II	1.8006
cds5505	WP_016733244.1	Cromosoma	fumarate hydratase	1.15574
cds5517	WP_016733120.1	Cromosoma	N-acetyltransferase	1.07576
cds5524	WP_016733126.1	Cromosoma	threonine--tRNA ligase	1.27943
cds5564	WP_012483948.1	Cromosoma	RluA family pseudouridine synthase	2.28388
cds5567	WP_016733153.1	Cromosoma	DUF1775 domain-containing protein	1.32718
cds5568	WP_016733154.1	Cromosoma	hypothetical protein	1.78038
cds5582	WP_016733164.1	Cromosoma	cysteine desulfurase	1.33203
cds5587	WP_004675609.1	Cromosoma	tyrosine--tRNA ligase	2.30963
cds5594	WP_029531237.1	Cromosoma	ATP-dependent helicase	1.87246
cds5606	WP_004676258.1	Cromosoma	serine hydrolase family protein	1.32514
cds5614	WP_016733186.1	Cromosoma	PLP-dependent aminotransferase family protein	2.66275
cds5618	WP_012483988.1	Cromosoma	hypothetical protein	1.03264
cds5620	WP_012483990.1	Cromosoma	monothiol glutaredoxin%2C Grx4 family	1.14149
cds5621	WP_012483991.1	Cromosoma	Bcr/CflA family drug resistance efflux transporter	1.83499
cds5625	WP_012483994.1	Cromosoma	inositol monophosphatase	1.0216
cds5626	WP_012483995.1	Cromosoma	tRNA 2-thiocytidine(32) synthetase TtcA	1.26486
cds5627	WP_010024905.1	Cromosoma	glutaminase	3.01116
cds5628	WP_004676212.1	Cromosoma	30S ribosomal protein S4	4.26309
cds5634	WP_004676199.1	Cromosoma	NADP-dependent isocitrate dehydrogenase	1.15995
cds5639	WP_016733199.1	Cromosoma	alanine--tRNA ligase	1.02567
cds5646	gbkey=CDS	Cromosoma	translation initiation factor IF-2	2.29572
cds5647	WP_004673396.1	Cromosoma	DNA-binding protein	2.34493
cds5648	WP_004673395.1	Cromosoma	transcription termination/antitermination protein NusA	2.99246
cds5649	WP_004673394.1	Cromosoma	ribosome maturation factor RimP	3.31552
cds5654	WP_004676724.1	Cromosoma	recombination protein RecR	1.02274
cds5659	end_range=11518,.	Cromosoma	SAM-dependent methyltransferase	1.2229
cds5667	WP_004672641.1	Cromosoma	cytochrome c family protein	1.64495
cds5674	WP_029531685.1	Cromosoma	DNA replication and repair protein RecF	1.2669
cds5677	WP_004672627.1	Cromosoma	molecular chaperone DnaJ	1.01736
cds5703	WP_004673514.1	Cromosoma	carbon-phosphorus lyase complex subunit PhnJ	1.50097
cds5704	WP_016735120.1	Cromosoma	carbon-phosphorus lyase complex subunit PhnI	2.07357
cds5705	WP_016735119.1	Cromosoma	phosphonate C-P lyase system protein PhnH	1.18634
cds5706	WP_016735118.1	Cromosoma	phosphonate C-P lyase system protein PhnG	2.54194
cds5707	WP_016735117.1	Cromosoma	phosphonate metabolism transcriptional regulator PhnF	2.06975
cds5710	WP_004673526.1	Cromosoma	ABC transporter ATP-binding protein	1.73748
cds5732	WP_004673564.1	Cromosoma	deoxyribose-phosphate aldolase	1.04212
cds5747	WP_004668690.1	Cromosoma	CpaF family protein	1.10305
cds5760	WP_004674838.1	Cromosoma	hypothetical protein	1.20456
cds5776	WP_016735074.1	Cromosoma	elongation factor 4	2.09122
cds5777	WP_016735073.1	Cromosoma	thiaminase II	1.01514
cds5778	WP_016735072.1	Cromosoma	XRE family transcriptional regulator	4.28733
cds5779	WP_016735071.1	Cromosoma	N-acetyltransferase	2.94659
cds5780	WP_016735070.1	Cromosoma	haloacid dehalogenase	1.01123
cds5789	WP_003570998.1	Cromosoma	50S ribosomal protein L35	4.0465
cds5790	WP_004673860.1	Cromosoma	50S ribosomal protein L20	3.96442
cds5791	WP_016735064.1	Cromosoma	phenylalanine--tRNA ligase subunit alpha	2.33641
cds5815	WP_016735042.1	Cromosoma	methylated-DNA--[protein]-cysteine S-methyltransferase	1.56531
cds5816	WP_016735041.1	Cromosoma	SDR family NAD(P)-dependent oxidoreductase	1.28388
cds5821	WP_016735037.1	Cromosoma	N-acetyltransferase	1.32409
cds5822	WP_016735036.1	Cromosoma	deaminase reductase	2.89975
cds5825	WP_016735033.1	Cromosoma	GMP synthase (glutamine-hydrolyzing)	1.88643
cds5830	WP_016735029.1	Cromosoma	hypothetical protein	1.30009
cds5832	WP_012482353.1	Cromosoma	peptidase	1.19446
cds5858	WP_016735006.1	Cromosoma	peptide chain release factor 3	2.73908
cds5864	WP_016735000.1	Cromosoma	MFS transporter	1.45791
cds5865	WP_016734999.1	Cromosoma	FadR family transcriptional regulator	1.93374
cds5882	WP_008524652.1	Cromosoma	30S ribosomal protein S20	3.98435
cds5888	WP_010024267.1	Cromosoma	ribonuclease PH	1.38316
cds5890	WP_010025709.1	Cromosoma	nucleotide exchange factor GrpE	1.06681
cds5895	WP_012482410.1	Cromosoma	methionine adenosyltransferase	3.53989
cds5896	WP_004679846.1	Cromosoma	XRE family transcriptional regulator	2.1564
cds5901	WP_016734974.1	Cromosoma	tRNA (N6-isopentenyl adenosine(37)-C2)-methylthiotransferase MiaB	1.00994
cds5905	WP_012482416.1	Cromosoma	tRNA (adenosine(37)-N6)-threonylcarbamoyltransferase complex dimerization subunit type 1 TsaB	1.46498
cds5908	WP_004679829.1	Cromosoma	tryptophan--tRNA ligase	2.07223
cds5930	WP_016734956.1	Cromosoma	RNA polymerase sigma-54 factor	1.15734
cds5938	WP_029531659.1	Cromosoma	peptide deformylase	2.44462
cds5945	WP_016734945.1	Cromosoma	2%2C3%2C4%2C5-tetrahydropyridine-2%2C6-dicarboxylate N-succinyltransferase	1.05467
cds5947	WP_016734943.1	Cromosoma	calcium-binding protein	5.78615
cds5953	WP_012482454.1	Cromosoma	acetylglutamate kinase	2.04761
cds5958	WP_010017635.1	Cromosoma	hypothetical protein	1.69054
cds5959	WP_012482459.1	Cromosoma	hypothetical protein	1.77822
cds5960	WP_016737600.1	Cromosoma	cold-shock protein	1.3611
cds5962	WP_029531655.1	Cromosoma	membrane protein insertase YidC	1.4106
cds5963	WP_004673114.1	Cromosoma	ribonuclease P protein component	2.25583
cds5964	WP_008524438.1	Cromosoma	50S ribosomal protein L34	2.71305
cds5967	gbkey=CDS	Cromosoma	nuclease	1.79004
cds5971	WP_029531653.1	Cromosoma	hypothetical protein	1.54355
cds5979	WP_016734919.1	Cromosoma	FAD-dependent oxidoreductase	1.36885
cds5982	WP_016734916.1	Cromosoma	nuclear transport factor 2 family protein	1.35235
cds5983	WP_010024680.1	Cromosoma	TetR/AcrR family transcriptional regulator	2.00078
cds5988	WP_016734910.1	Cromosoma	NADP-dependent oxidoreductase	2.88569
cds5989	WP_016734909.1	Cromosoma	TetR/AcrR family transcriptional regulator	1.88338
cds5992	WP_016734907.1	Cromosoma	ROK family transcriptional regulator	1.43771
cds5993	WP_016734906.1	Cromosoma	sugar ABC transporter substrate-binding protein	1.02416
cds6000	WP_012482521.1	Cromosoma	DUF1772 domain-containing protein	1.03114
cds6023	WP_016734884.1	Cromosoma	altronate dehydratase	1.29329
cds6043	WP_012482561.1	Cromosoma	ornithine carbamoyltransferase	1.49063
cds6044	WP_012482562.1	Cromosoma	Hsp33 family molecular chaperone	2.42907
cds6047	WP_012482564.1	Cromosoma	O-succinylhomoserine sulfhydrylase	1.48295
cds6055	WP_012482571.1	Cromosoma	helix-turn-helix transcriptional regulator	1.03206
cds6064	WP_016734859.1	Cromosoma	YitT family protein	2.81273
cds6071	WP_016734853.1	Cromosoma	dihydrofolate reductase	4.99649
cds6081	WP_004675957.1	Cromosoma	cold-shock protein	2.44236
cds6082	WP_004675956.1	Cromosoma	MarR family transcriptional regulator	2.23224
cds6083	WP_010010011.1	Cromosoma	GFA family protein	4.32795
cds6084	WP_012482597.1	Cromosoma	ketosteroid isomerase	2.32748
cds6085	WP_016734846.1	Cromosoma	MFS transporter	1.82487
cds6089	WP_016734842.1	Cromosoma	pyridoxal phosphate-dependent aminotransferase	1.44928
cds6106	WP_003545338.1	Cromosoma	translation initiation factor IF-1	1.46482
cds6107	WP_012482617.1	Cromosoma	Maf-like protein	1.28093
cds6135	WP_012482641.1	Cromosoma	sugar ABC transporter substrate-binding protein	1.39277
cds6136	WP_016734810.1	Cromosoma	sugar ABC transporter ATP-binding protein	3.18
cds6137	WP_016734809.1	Cromosoma	ABC transporter permease	3.13773
cds6156	WP_016734797.1	Cromosoma	protein translocase subunit SecDF	2.08644
cds6230	WP_016734759.1	Cromosoma	phosphogluconate dehydratase	1.24629
cds6232	WP_004673775.1	Cromosoma	glucose-6-phosphate dehydrogenase	1.45085
cds6235	WP_016734755.1	Cromosoma	NAD(P)/FAD-dependent oxidoreductase	1.01122
cds6249	WP_016734743.1	Cromosoma	PAS domain-containing sensor histidine kinase	1.56431
cds6250	WP_012482731.1	Cromosoma	phasin	4.06992
cds6260	WP_012482735.1	Cromosoma	dipeptide ABC transporter permease DppC	1.12914
cds6261	WP_016734733.1	Cromosoma	ABC transporter ATP-binding protein	1.54145
cds6262	WP_004676185.1	Cromosoma	ABC transporter ATP-binding protein	1.18269
cds6292	WP_016734703.1	Cromosoma	Ppx/GppA family phosphatase	1.64946
cds6293	WP_012482788.1	Cromosoma	ribosomal RNA large subunit methyltransferase E	1.15061
cds6297	WP_012482792.1	Cromosoma	IMP dehydrogenase	2.94835
cds6307	WP_016734694.1	Cromosoma	16S rRNA (uracil(1498)-N(3))-methyltransferase	1.16498
cds6308	WP_016734693.1	Cromosoma	inorganic phosphate transporter	1.18393
cds6312	WP_016734689.1	Cromosoma	glycolate oxidase subunit GlcE	1.06417
cds6325	WP_029531624.1	Cromosoma	histidine--tRNA ligase	1.86313
cds6326	WP_016734680.1	Cromosoma	ATP phosphoribosyltransferase regulatory subunit	1.08467
cds6328	WP_016734679.1	Cromosoma	DoxX family protein	2.05643
cds6337	WP_029531621.1	Cromosoma	isoleucine--tRNA ligase	2.08599
cds6339	WP_016734672.1	Cromosoma	nucleoside deaminase	1.61508
cds6340	WP_016734671.1	Cromosoma	pseudouridylate synthase	1.31292
cds6369	WP_004675822.1	Cromosoma	F0F1 ATP synthase assembly protein	2.11997
cds6370	WP_010004512.1	Cromosoma	ATP synthase subunit A	1.80271
cds6371	WP_003588243.1	Cromosoma	F0F1 ATP synthase subunit C	1.30325
cds6375	WP_016734649.1	Cromosoma	radical SAM protein	1.55888
cds6376	WP_016734648.1	Cromosoma	glycosyl transferase	1.63645
cds6382	WP_004672609.1	Cromosoma	DUF2007 domain-containing protein	2.0947
cds6383	WP_016734642.1	Cromosoma	methyltransferase domain-containing protein	3.93161
cds6384	WP_016734641.1	Cromosoma	divalent metal cation transporter	3.98744
cds6387	WP_016734639.1	Cromosoma	glycine--tRNA ligase subunit alpha	1.36143
cds6394	WP_016734634.1	Cromosoma	phosphoribosylamine--glycine ligase	1.32952
cds6397	WP_016734631.1	Cromosoma	glycine--tRNA ligase subunit beta	1.52284
cds6406	WP_029531614.1	Cromosoma	threonylcarbamoyl-AMP synthase	1.51708
cds6415	WP_016734619.1	Cromosoma	membrane protein	3.33162
cds6416	WP_016734618.1	Cromosoma	oxidoreductase	7.85858
cds6417	WP_016734617.1	Cromosoma	transcriptional regulator	4.14215
cds6418	WP_016734616.1	Cromosoma	class I SAM-dependent RNA methyltransferase	1.96742
cds6419	WP_029531612.1	Cromosoma	TlyA family rRNA (cytidine-2'-O)-methyltransferase	1.75623
cds6429	WP_016734606.1	Cromosoma	MCD%2C Malonyl-CoA decarboxylase MCD	1.39989
cds6439	WP_016734598.1	Cromosoma	LysR family transcriptional regulator	1.13194
cds6441	WP_004674135.1	Cromosoma	biotin transporter BioY	1.05499
cds6443	WP_016734594.1	Cromosoma	ABC transporter ATP-binding protein	1.54281
cds6446	WP_029531608.1	Cromosoma	chorismate synthase	1.23985
cds6450	WP_012482921.1	Cromosoma	histidine phosphatase family protein	2.14562
cds6451	WP_016734590.1	Cromosoma	enoyl-[acyl-carrier-protein] reductase FabI	2.57246
cds6463	WP_012482931.1	Cromosoma	cytochrome c oxidase subunit II	1.0974
cds6481	WP_016734570.1	Cromosoma	ABC transporter ATP-binding protein	1.48523
cds6482	WP_010021814.1	Cromosoma	metal ABC transporter permease	1.3662
cds6489	WP_016734566.1	Cromosoma	threonine synthase	1.56066
cds6490	WP_012482951.1	Cromosoma	hypothetical protein	1.13414
cds6491	WP_016734564.1	Cromosoma	haloacid dehalogenase	1.97414
cds6504	WP_029531598.1	Cromosoma	HAD family phosphatase	1.17967
cds6507	WP_016734549.1	Cromosoma	fucose-binding protein	1.13594
cds6508	WP_016734548.1	Cromosoma	LacI family transcriptional regulator	1.60287

## Sheet: TableS3
Supplementary table S3. Up-regulated genes of R. phaseoli Ch24-10 in milpa exudates compared to Ch24-10 in Fahraeus solution
ORF	NCBI Protein ID	Locus	Product	logFC
cds21	WP_016736932.1	Plasmid_A	amino acid synthesis family protein	4.00944
cds22	WP_016736931.1	Plasmid_A	alpha/beta hydrolase	3.82996
cds23	WP_016736930.1	Plasmid_A	flavin monooxygenase/reductase	2.95014
cds24	WP_016736929.1	Plasmid_A	LLM class flavin-dependent oxidoreductase	2.03888
cds41	WP_016736911.1	Plasmid_A	SIS domain-containing protein	1.31846
cds59	WP_016736894.1	Plasmid_A	LacI family transcriptional regulator	3.25423
cds60	WP_016736893.1	Plasmid_A	peptide ABC transporter	1.89334
cds118	WP_029532041.1	Plasmid_A	hypothetical protein	2.08453
cds123	WP_016736835.1	Plasmid_A	glycerophosphoryl diester phosphodiesterase	1.33051
cds150	WP_029532030.1	Plasmid_A	ABC transporter substrate-binding protein	2.30903
cds151	WP_016736811.1	Plasmid_A	ABC transporter ATP-binding protein	1.53867
cds152	WP_004677491.1	Plasmid_A	ABC transporter permease	1.47243
cds153	WP_029532026.1	Plasmid_A	dihydroxy-acid dehydratase	1.33231
cds154	WP_016736809.1	Plasmid_A	ribonuclease activity regulator RraA	1.00169
cds208	WP_029532139.1	Plasmid_A	LacI family transcriptional regulator	1.06942
cds209	WP_010016978.1	Plasmid_A	carbohydrate ABC transporter permease	1.2275
cds210	WP_016737081.1	Plasmid_A	sugar ABC transporter permease	2.03502
cds229	WP_004674667.1	Plasmid_A	formaldehyde dehydrogenase%2C glutathione-independent	1.49841
cds232	WP_016737066.1	Plasmid_A	EamA family transporter	1.4047
cds245	WP_016737053.1	Plasmid_A	peptide ABC transporter substrate-binding protein	1.98218
cds246	WP_016737052.1	Plasmid_A	peptidase	1.31873
cds247	WP_016737051.1	Plasmid_A	alpha/beta hydrolase	1.09101
cds252	WP_016737046.1	Plasmid_A	L-idonate 5-dehydrogenase	1.13315
cds253	WP_016737045.1	Plasmid_A	2-hydroxyacid dehydrogenase	2.34969
cds254	WP_016737044.1	Plasmid_A	KR domain-containing protein	1.91163
cds255	WP_016737043.1	Plasmid_A	gluconokinase	1.58897
cds268	WP_004670792.1	Plasmid_A	histidine/lysine/arginine/ornithine ABC transporter ATP-binding protein HisP	1.91871
cds269	WP_016737032.1	Plasmid_A	amino acid ABC transporter	1.13065
cds278	WP_016737023.1	Plasmid_A	FMN-dependent monooxygenase	1.21467
cds279	WP_004670822.1	Plasmid_A	IclR family transcriptional regulator	2.47828
cds280	WP_029532110.1	Plasmid_A	ABC transporter substrate-binding protein	1.9146
cds302	WP_016737000.1	Plasmid_A	amino acid ABC transporter permease	1.06766
cds311	WP_016736991.1	Plasmid_A	acetyl-CoA carboxylase biotin carboxyl carrier protein subunit	1.00106
cds324	WP_016736978.1	Plasmid_A	alpha-ketoglutarate-dependent dioxygenase AlkB	1.31625
cds325	WP_016736977.1	Plasmid_A	hypothetical protein	1.9688
cds326	WP_004670929.1	Plasmid_A	30S ribosomal protein S21	1.60456
cds353	WP_016736659.1	Plasmid_B	potassium-transporting ATPase subunit KdpA	1.29917
cds380	WP_004678031.1	Plasmid_B	DeoR/GlpR transcriptional regulator	1.84004
cds381	WP_016736680.1	Plasmid_B	bifunctional rhamnulose-1-phosphate aldolase/short-chain dehydrogenase	2.11065
cds397	WP_029531975.1	Plasmid_B	LysR family transcriptional regulator	1.34346
cds408	WP_016736700.1	Plasmid_B	N-acetyltransferase	1.63945
cds409	WP_016736701.1	Plasmid_B	bifunctional hydroxymethylpyrimidine kinase/phosphomethylpyrimidine kinase	1.18062
cds428	WP_012490656.1	Plasmid_B	hypothetical protein	1.00051
cds430	WP_029531978.1	Plasmid_B	hypothetical protein	3.54769
cds434	WP_029531980.1	Plasmid_B	membrane protein	1.38404
cds463	WP_039752254.1	Plasmid_B	2-deoxy-D-gluconate 3-dehydrogenase	1.32526
cds464	WP_016736741.1	Plasmid_B	5-dehydro-4-deoxy-D-glucuronate isomerase	1.4708
cds465	WP_004669789.1	Plasmid_B	DUF1127 domain-containing protein	3.26903
cds468	WP_016736744.1	Plasmid_B	aldo/keto reductase	1.09286
cds471	WP_029531995.1	Plasmid_B	septum formation inhibitor MinC	1.36689
cds472	WP_016736747.1	Plasmid_B	TetR/AcrR family transcriptional regulator	5.89404
cds473	WP_016736748.1	Plasmid_B	efflux RND transporter periplasmic adaptor subunit	5.71476
cds474	WP_046977157.1	Plasmid_B	AcrB/AcrD/AcrF family protein	2.80946
cds475	gbkey=CDS	Plasmid_B	TetR family transcriptional regulator	1.05461
cds476	WP_016736751.1	Plasmid_B	hypothetical protein	1.48074
cds477	WP_012490702.1	Plasmid_B	oxidoreductase	5.36906
cds478	WP_012490703.1	Plasmid_B	formyltetrahydrofolate deformylase	2.01515
cds507	WP_012490730.1	Plasmid_B	nicotinate-nucleotide diphosphorylase (carboxylating)	1.32248
cds508	WP_016736774.1	Plasmid_B	L-aspartate oxidase	1.52107
cds521	WP_016736787.1	Plasmid_B	precorrin-2 C(20)-methyltransferase	1.26223
cds522	WP_016736788.1	Plasmid_B	precorrin-8X methylmutase	1.46526
cds566	WP_029531919.1	Plasmid_B	ubiquinol oxidase subunit II	1.5952
cds569	WP_016736513.1	Plasmid_B	hypothetical protein	2.08104
cds570	WP_016736514.1	Plasmid_B	type II toxin-antitoxin system RelE/ParE family toxin	1.95624
cds571	WP_016736515.1	Plasmid_B	hypothetical protein	1.90792
cds618	WP_016736554.1	Plasmid_B	N-formylglutamate deformylase	1.77655
cds619	WP_016736555.1	Plasmid_B	histidine ammonia-lyase	2.77989
cds620	WP_029531939.1	Plasmid_B	imidazolonepropionase	3.27061
cds621	WP_016736556.1	Plasmid_B	formimidoylglutamate deiminase	2.82287
cds622	WP_016736557.1	Plasmid_B	histidine utilization repressor	2.36553
cds623	WP_012490471.1	Plasmid_B	histidine utilization repressor	1.80165
cds625	WP_012490473.1	Plasmid_B	ABC transporter substrate-binding protein	1.9576
cds626	WP_016736558.1	Plasmid_B	ABC transporter permease	2.18195
cds627	WP_004674851.1	Plasmid_B	ABC transporter permease	1.90047
cds628	WP_012490476.1	Plasmid_B	histidine/lysine/arginine/ornithine ABC transporter ATP-binding protein HisP	1.45077
cds629	WP_016736559.1	Plasmid_B	histidine ammonia-lyase	1.15707
cds637	WP_046977160.1	Plasmid_B	alpha-glucosidase/alpha-galactosidase	1.56188
cds638	WP_016736567.1	Plasmid_B	periplasmic alpha-galactoside-binding protein	1.07983
cds689	WP_016736613.1	Plasmid_B	IclR family transcriptional regulator	1.14449
cds748	WP_080515687.1	Plasmid_C	hypothetical protein	1.05006
cds785	WP_004671987.1	Plasmid_C	XRE family transcriptional regulator	1.78736
cds820	WP_016737490.1	Plasmid_C	hypothetical protein	6.02687
cds821	WP_011053454.1	Plasmid_C	nodulation protein	2.67826
cds827	WP_010022281.1	Plasmid_C	hypothetical protein	3.04811
cds831	WP_010024000.1	Plasmid_C	nodulation factor ABC transporter ATP-binding protein NodI	1.83337
cds832	gbkey=CDS	Plasmid_C	hypothetical protein	2.03849
cds833	WP_011053463.1	Plasmid_C	methyltransferase domain-containing protein	2.87917
cds834	WP_011053464.1	Plasmid_C	chitooligosaccharide synthase NodC	3.48226
cds835	WP_011053465.1	Plasmid_C	chitooligosaccharide deacetylase NodB	4.33898
cds836	WP_011053466.1	Plasmid_C	hypothetical protein	5.95729
cds838	WP_010025697.1	Plasmid_C	nodulation protein NodZ	1.82712
cds872	WP_004679687.1	Plasmid_C	nodulation protein A	4.54431
cds886	WP_004677759.1	Plasmid_C	LLM class flavin-dependent oxidoreductase	1.2937
cds962	gbkey=CDS	Plasmid_C	hypothetical protein	1.15781
cds998	gbkey=CDS	Plasmid_C	hypothetical protein	1.51079
cds1006	WP_077991535.1	Plasmid_C	hypothetical protein	1.28682
cds1007	WP_016737410.1	Plasmid_C	hypothetical protein	3.02167
cds1008	gbkey=CDS	Plasmid_C	hypothetical protein	1.86196
cds1013	WP_008534237.1	Plasmid_C	hypothetical protein	1.94857
cds1014	WP_046977176.1	Plasmid_C	hypothetical protein	1.75082
cds1015	WP_046977177.1	Plasmid_C	EscJ/YscJ/HrcJ family type III secretion inner membrane ring protein	2.48661
cds1016	WP_046977178.1	Plasmid_C	hypothetical protein	1.21536
cds1017	WP_046977179.1	Plasmid_C	HrpE/YscL family type III secretion apparatus protein	2.51928
cds1018	WP_046977180.1	Plasmid_C	FliI/YscN family ATPase	1.37661
cds1028	WP_009995183.1	Plasmid_C	hypothetical protein	1.60074
cds1032	WP_010031884.1	Plasmid_C	hypothetical protein	1.32776
cds1045	WP_011053340.1	Plasmid_C	NAD(P)-dependent oxidoreductase	1.15671
cds1064	WP_016737424.1	Plasmid_C	AraC family transcriptional regulator	1.05858
cds1077	WP_008534378.1	Plasmid_C	flavin reductase	1.67266
cds1078	WP_008534380.1	Plasmid_C	4-carboxymuconolactone decarboxylase	1.7433
cds1079	WP_016737431.1	Plasmid_C	LLM class flavin-dependent oxidoreductase	1.07294
cds1088	WP_016737437.1	Plasmid_C	sugar ABC transporter substrate-binding protein	1.86482
cds1089	WP_039752580.1	Plasmid_C	sugar ABC transporter ATP-binding protein	1.31171
cds1115	WP_016737454.1	Plasmid_C	PIN domain-containing protein	1.3376
cds1116	WP_039752605.1	Plasmid_C	excisionase	1.03132
cds1196	WP_016735368.1	Plasmid_D	acyl-CoA thioesterase	1.12864
cds1210	WP_016735379.1	Plasmid_D	sugar kinase	1.39168
cds1211	WP_016735380.1	Plasmid_D	hypothetical protein	1.1246
cds1244	WP_016735412.1	Plasmid_D	TRAP transporter large permease	1.22459
cds1245	WP_016735413.1	Plasmid_D	L-idonate 5-dehydrogenase	1.6569
cds1317	WP_029531734.1	Plasmid_D	dihydrodipicolinate synthase family protein	1.68796
cds1326	WP_016735485.1	Plasmid_D	hypothetical protein	1.11381
cds1327	WP_016735486.1	Plasmid_D	LysR family transcriptional regulator	1.1436
cds1347	WP_016735504.1	Plasmid_D	XRE family transcriptional regulator	1.47912
cds1369	WP_016735525.1	Plasmid_D	thiol reductant ABC exporter subunit CydD	1.23059
cds1370	WP_016735526.1	Plasmid_D	GbsR/MarR family transcriptional regulator	1.01332
cds1390	WP_029531741.1	Plasmid_D	gfo/Idh/MocA family oxidoreductase	1.3504
cds1391	WP_016735545.1	Plasmid_D	sugar phosphate isomerase/epimerase	1.28199
cds1399	WP_016735548.1	Plasmid_D	methyltransferase domain-containing protein	1.05883
cds1404	WP_016735553.1	Plasmid_D	amidase	1.4374
cds1423	WP_016735565.1	Plasmid_D	type II toxin-antitoxin system Phd/YefM family antitoxin	1.18421
cds1424	WP_016735566.1	Plasmid_D	PIN domain-containing protein	1.52233
cds1425	gbkey=CDS	Plasmid_D	IS5/IS1182 family transposase	1.68028
cds1444	WP_016735584.1	Plasmid_D	hypothetical protein	1.82789
cds1445	WP_016735585.1	Plasmid_D	hypothetical protein	1.13592
cds1461	WP_016735600.1	Plasmid_D	DNA-binding protein	2.58097
cds1462	WP_016735601.1	Plasmid_D	hypothetical protein	2.79552
cds1465	WP_052766881.1	Plasmid_D	FAD-dependent monooxygenase	1.00379
cds1558	WP_016735684.1	Plasmid_D	alcohol dehydrogenase	1.29946
cds1565	WP_016735690.1	Plasmid_D	ABC transporter ATP-binding protein	1.53243
cds1566	WP_004673596.1	Plasmid_D	ABC transporter ATP-binding protein	2.42703
cds1567	WP_016735691.1	Plasmid_D	glycerol-3-phosphate dehydrogenase	2.21261
cds1568	WP_016735692.1	Plasmid_D	DeoR/GlpR transcriptional regulator	1.03518
cds1577	WP_016735699.1	Plasmid_D	EmrB/QacA family drug resistance transporter	3.95847
cds1578	WP_016735700.1	Plasmid_D	HlyD family secretion protein	5.27671
cds1579	WP_029531771.1	Plasmid_D	TetR/AcrR family transcriptional regulator	4.1987
cds1580	WP_016735702.1	Plasmid_D	mannonate dehydratase	1.84724
cds1603	WP_016735725.1	Plasmid_D	ABC transporter substrate-binding protein	2.10091
cds1607	end_range=414906,.	Plasmid_D	hypothetical protein	1.00693
cds1658	WP_016735773.1	Plasmid_D	mandelate racemase/muconate lactonizing enzyme family protein	1.41794
cds1659	WP_016735774.1	Plasmid_D	ABC transporter ATP-binding protein	1.10533
cds1661	WP_016735776.1	Plasmid_D	ABC transporter permease	1.0403
cds1663	WP_012489932.1	Plasmid_D	FadR family transcriptional regulator	2.15414
cds1664	WP_016735778.1	Plasmid_D	NAD(P)-dependent oxidoreductase	1.28805
cds1665	WP_016735779.1	Plasmid_D	SMP-30/gluconolactonase/LRE family protein	1.26166
cds1682	WP_016735795.1	Plasmid_D	amino acid ABC transporter substrate-binding protein	1.22796
cds1718	WP_016735829.1	Plasmid_D	AcrB/AcrD/AcrF family protein	2.02565
cds1719	WP_016735830.1	Plasmid_D	efflux RND transporter periplasmic adaptor subunit	3.81486
cds1720	WP_016735831.1	Plasmid_D	efflux RND transporter periplasmic adaptor subunit	4.49173
cds1721	WP_029531790.1	Plasmid_D	TetR/AcrR family transcriptional regulator	2.47053
cds1722	WP_029531791.1	Plasmid_D	LacI family transcriptional regulator	1.61651
cds1728	WP_016735840.1	Plasmid_D	polygalacturonase	1.00796
cds1729	WP_016735841.1	Plasmid_D	glycosyl hydrolase	1.13758
cds1731	WP_016735843.1	Plasmid_D	carbohydrate ABC transporter substrate-binding protein	2.188
cds1733	WP_016735844.1	Plasmid_D	DUF3422 domain-containing protein	1.42276
cds1740	WP_004677397.1	Plasmid_D	LacI family transcriptional regulator	1.07914
cds1743	WP_004677391.1	Plasmid_D	FadR family transcriptional regulator	1.7022
cds1750	WP_016735857.1	Plasmid_D	heparinase	3.20406
cds1751	WP_016735858.1	Plasmid_D	sugar ABC transporter permease	3.42368
cds1752	WP_016735859.1	Plasmid_D	carbohydrate ABC transporter permease	1.74857
cds1753	WP_016735860.1	Plasmid_D	glucoronyl hydrolase	2.14511
cds1829	WP_016735926.1	Plasmid_D	oxidoreductase	1.78832
cds1856	WP_016735951.1	Plasmid_D	hypothetical protein	1.25253
cds1891	WP_010020762.1	Plasmid_D	TetR/AcrR family transcriptional regulator	1.38238
cds1892	WP_016735984.1	Plasmid_D	hypothetical protein	1.21702
cds1897	WP_004669204.1	Plasmid_D	LacI family transcriptional regulator	1.73844
cds1923	WP_016736009.1	Plasmid_D	amino acid ABC transporter ATP-binding protein	1.4673
cds1924	WP_004669259.1	Plasmid_D	amino acid ABC transporter permease	1.53707
cds1925	WP_016736010.1	Plasmid_D	amino acid ABC transporter permease	1.94815
cds1934	WP_016736015.1	Plasmid_D	TetR/AcrR family transcriptional regulator	1.41276
cds1980	WP_010004393.1	Plasmid_D	hypothetical protein	1.52688
cds1981	WP_016736056.1	Plasmid_D	PIN domain-containing protein	1.19291
cds1987	gbkey=CDS	Plasmid_D	hypothetical protein	1.31778
cds2021	gbkey=CDS	Plasmid_D	IS5/IS1182 family transposase	1.35621
cds2029	end_range=859902,.	Plasmid_D	hypothetical protein	1.27454
cds2032	end_range=861851,.	Plasmid_D	hypothetical protein	1.50759
cds2033	WP_029531829.1	Plasmid_D	cold-shock protein	1.24544
cds2034	WP_011428437.1	Plasmid_D	hypothetical protein	1.3124
cds2036	WP_016736098.1	Plasmid_D	hypothetical protein	2.13524
cds2037	WP_080956208.1	Plasmid_D	hypothetical protein	2.29116
cds2055	WP_016736110.1	Plasmid_D	curlin	1.67957
cds2056	WP_016736111.1	Plasmid_D	hypothetical protein	1.12443
cds2057	WP_029531832.1	Plasmid_D	curlin	1.38395
cds2061	WP_016737599.1	Plasmid_D	cold-shock protein	1.27965
cds2086	WP_080956210.1	Plasmid_D	TetR/AcrR family transcriptional regulator	1.43642
cds2107	WP_016736157.1	Plasmid_D	cold-shock protein	2.06855
cds2108	WP_016736158.1	Plasmid_D	hypothetical protein	2.07509
cds2109	WP_016736159.1	Plasmid_D	hypothetical protein	1.36934
cds2110	WP_016736160.1	Plasmid_D	hypothetical protein	1.67761
cds2111	end_range=922131,.	Plasmid_D	histidine kinase	1.1155
cds2195	WP_080956220.1	Plasmid_D	cysteine hydrolase	1.14427
cds2198	WP_016735294.1	Plasmid_D	NAD(P)-dependent alcohol dehydrogenase	1.31981
cds2199	WP_016735295.1	Plasmid_D	crotonase	1.75919
cds2200	WP_016735296.1	Plasmid_D	feruloyl-CoA synthetase	1.94443
cds2204	WP_016735300.1	Plasmid_D	ABC transporter substrate-binding protein	1.1255
cds2205	WP_016735301.1	Plasmid_D	ABC transporter ATP-binding protein	1.88275
cds2206	WP_016735302.1	Plasmid_D	ABC transporter ATP-binding protein	2.06689
cds2207	WP_016735303.1	Plasmid_D	branched-chain amino acid ABC transporter permease	1.47674
cds2209	WP_029531706.1	Plasmid_D	3-alpha-hydroxysteroid dehydrogenase	1.30314
cds2210	WP_016735306.1	Plasmid_D	salicylaldehyde dehydrogenase	1.0616
cds2242	WP_029531708.1	Plasmid_D	ribulose 1%2C5-bisphosphate carboxylase	1.67772
cds2243	WP_029531709.1	Plasmid_D	four-carbon acid sugar kinase family protein	1.21928
cds2244	WP_016735336.1	Plasmid_D	triose-phosphate isomerase	1.36047
cds2245	WP_004678734.1	Plasmid_D	ribose 5-phosphate isomerase B	2.33888
cds2249	WP_004678740.1	Plasmid_D	sugar ABC transporter ATP-binding protein	1.08543
cds2265	WP_029531713.1	Plasmid_D	sugar phosphate isomerase/epimerase	1.13466
cds2266	WP_016735351.1	Plasmid_D	ABC transporter ATP-binding protein	1.29995
cds2267	WP_016735352.1	Plasmid_D	plasmid partitioning protein RepA	1.19909
cds2278	WP_080956221.1	Plasmid_D	hypothetical protein	1.0595
cds2365	WP_016734081.1	Cromosoma	hypothetical protein	1.25239
cds2366	WP_016734080.1	Cromosoma	hypothetical protein	1.42998
cds2373	WP_016734077.1	Cromosoma	ROK family transcriptional regulator	1.33721
cds2390	WP_009998001.1	Cromosoma	30S ribosomal protein S9	2.97224
cds2391	WP_008521951.1	Cromosoma	50S ribosomal protein L13	3.40426
cds2423	WP_008521906.1	Cromosoma	NADH-quinone oxidoreductase subunit A	1.05394
cds2427	WP_004680054.1	Cromosoma	hypothetical protein	1.23658
cds2431	WP_016734044.1	Cromosoma	NADH-quinone oxidoreductase subunit G	1.03373
cds2442	WP_029531512.1	Cromosoma	DUF1467 domain-containing protein	1.11938
cds2455	WP_003587245.1	Cromosoma	50S ribosomal protein L33	2.85333
cds2462	WP_016734021.1	Cromosoma	dihydroorotase	1.06409
cds2463	WP_016734020.1	Cromosoma	aspartate carbamoyltransferase	1.3577
cds2468	WP_016734016.1	Cromosoma	penicillin-binding protein 1A	1.04312
cds2480	WP_003573826.1	Cromosoma	preprotein translocase subunit SecE	2.08916
cds2481	WP_004669067.1	Cromosoma	transcription termination/antitermination protein NusG	1.84303
cds2482	WP_004669070.1	Cromosoma	50S ribosomal protein L11	1.79955
cds2483	WP_004669072.1	Cromosoma	50S ribosomal protein L1	1.76867
cds2484	WP_037113092.1	Cromosoma	50S ribosomal protein L10	1.34892
cds2485	WP_004669074.1	Cromosoma	50S ribosomal protein L7/L12	1.11209
cds2489	WP_003547537.1	Cromosoma	30S ribosomal protein S12	4.98186
cds2490	WP_004669085.1	Cromosoma	30S ribosomal protein S7	4.42308
cds2491	WP_038688280.1	Cromosoma	elongation factor G	3.2814
cds2492	WP_004669088.1	Cromosoma	elongation factor Tu	1.01754
cds2493	WP_003547547.1	Cromosoma	30S ribosomal protein S10	2.88474
cds2494	WP_016734008.1	Cromosoma	50S ribosomal protein L3	2.51155
cds2495	WP_004674918.1	Cromosoma	50S ribosomal protein L4	2.18879
cds2496	WP_003547550.1	Cromosoma	50S ribosomal protein L23	2.14105
cds2497	WP_009986456.1	Cromosoma	50S ribosomal protein L2	1.84368
cds2498	WP_003573797.1	Cromosoma	30S ribosomal protein S19	1.45752
cds2499	WP_004674922.1	Cromosoma	50S ribosomal protein L22	1.39897
cds2500	WP_003573793.1	Cromosoma	30S ribosomal protein S3	1.08063
cds2504	WP_003573790.1	Cromosoma	50S ribosomal protein L14	3.54442
cds2505	WP_004674929.1	Cromosoma	50S ribosomal protein L24	3.12562
cds2506	WP_016734007.1	Cromosoma	50S ribosomal protein L5	2.44641
cds2507	WP_003573787.1	Cromosoma	30S ribosomal protein S14	2.18058
cds2508	WP_003547562.1	Cromosoma	30S ribosomal protein S8	1.80908
cds2509	WP_003578670.1	Cromosoma	50S ribosomal protein L6	1.61782
cds2510	WP_003573785.1	Cromosoma	50S ribosomal protein L18	1.35589
cds2511	WP_003573784.1	Cromosoma	30S ribosomal protein S5	1.19293
cds2512	WP_003547566.1	Cromosoma	50S ribosomal protein L30	1.188
cds2516	WP_003573772.1	Cromosoma	30S ribosomal protein S13	2.81778
cds2517	WP_003547577.1	Cromosoma	30S ribosomal protein S11	2.15644
cds2518	WP_003547579.1	Cromosoma	DNA-directed RNA polymerase subunit alpha	1.87165
cds2519	WP_009995243.1	Cromosoma	50S ribosomal protein L17	1.50258
cds2520	WP_016734003.1	Cromosoma	VOC family protein	1.29202
cds2570	WP_016732818.1	Cromosoma	homogentisate 1%2C2-dioxygenase	1.2237
cds2571	WP_016732819.1	Cromosoma	FAA hydrolase family protein	1.68763
cds2572	WP_016732820.1	Cromosoma	maleylacetoacetate isomerase	1.52481
cds2573	WP_012483534.1	Cromosoma	MEKHLA domain-containing protein	1.46692
cds2591	WP_012483551.1	Cromosoma	3-oxoacyl-ACP reductase	3.54699
cds2592	WP_012483552.1	Cromosoma	TetR/AcrR family transcriptional regulator	5.01542
cds2593	WP_012483553.1	Cromosoma	FMN-dependent NADH-azoreductase	2.15422
cds2599	WP_016732838.1	Cromosoma	alanine dehydrogenase	1.9364
cds2600	WP_016732839.1	Cromosoma	DUF1203 domain-containing protein	2.69502
cds2618	WP_012483575.1	Cromosoma	ANTAR domain-containing protein	1.19342
cds2630	WP_037113865.1	Cromosoma	hypothetical protein	1.43585
cds2655	WP_012483593.1	Cromosoma	exodeoxyribonuclease III	1.04494
cds2671	WP_004678848.1	Cromosoma	preprotein translocase subunit YajC	1.38798
cds2676	WP_016732903.1	Cromosoma	FADH(2)-oxidizing methylenetetrahydrofolate--tRNA-(uracil(54)-C(5))-methyltransferase TrmFO	1.62086
cds2677	WP_004678841.1	Cromosoma	DUF1127 domain-containing protein	2.32139
cds2678	WP_004678838.1	Cromosoma	DUF1127 domain-containing protein	2.57895
cds2681	WP_004678834.1	Cromosoma	trigger factor	2.34168
cds2705	WP_004671258.1	Cromosoma	NADH:ubiquinone oxidoreductase subunit NDUFA12	1.00902
cds2706	WP_016732913.1	Cromosoma	DUF2155 domain-containing protein	1.04136
cds2755	gbkey=CDS	Cromosoma	hypothetical protein	1.02236
cds2758	WP_008526906.1	Cromosoma	30S ribosomal protein S2	2.97086
cds2759	WP_009994369.1	Cromosoma	elongation factor Ts	2.3181
cds2778	WP_012483684.1	Cromosoma	pyruvate dehydrogenase (acetyl-transferring) E1 component subunit alpha	1.15119
cds2791	WP_016732968.1	Cromosoma	bifunctional 2-C-methyl-D-erythritol 4-phosphate cytidylyltransferase/2-C-methyl-D-erythritol 2%2C4-cyclodiphosphate synthase	1.30454
cds2818	WP_029531170.1	Cromosoma	uroporphyrinogen-III C-methyltransferase	1.20959
cds2820	WP_016732974.1	Cromosoma	nitrite/sulfite reductase	1.04683
cds2823	WP_016732977.1	Cromosoma	AEC family transporter	1.13817
cds2833	gbkey=CDS	Cromosoma	LysR family transcriptional regulator	1.30347
cds2834	WP_016732989.1	Cromosoma	ABC transporter ATP-binding protein	1.05129
cds2839	WP_016732994.1	Cromosoma	hypothetical protein	1.29244
cds2841	WP_016732996.1	Cromosoma	MarR family transcriptional regulator	1.89924
cds2844	WP_016732999.1	Cromosoma	gfo/Idh/MocA family oxidoreductase	1.34542
cds2848	WP_004673807.1	Cromosoma	carbohydrate ABC transporter permease	1.08301
cds2849	WP_046977064.1	Cromosoma	ABC transporter ATP-binding protein	1.2058
cds2850	gbkey=CDS	Cromosoma	5-dehydro-4-deoxyglucarate dehydratase	2.60845
cds2851	WP_012483749.1	Cromosoma	mannonate dehydratase	2.66677
cds2853	WP_016733006.1	Cromosoma	ABC transporter substrate-binding protein	2.29081
cds2854	WP_012483752.1	Cromosoma	ABC transporter permease	2.11708
cds2855	WP_016733007.1	Cromosoma	ABC transporter permease	1.31969
cds2868	WP_016733018.1	Cromosoma	GFA family protein	1.10301
cds2880	WP_004673778.1	Cromosoma	sugar ABC transporter substrate-binding protein	3.66003
cds2881	WP_020465354.1	Cromosoma	sugar ABC transporter ATP-binding protein	3.33545
cds2882	WP_016733027.1	Cromosoma	ABC transporter permease	1.11258
cds2886	WP_016733030.1	Cromosoma	glutamine--fructose-6-phosphate transaminase (isomerizing)	1.62705
cds2889	WP_004680228.1	Cromosoma	succinate dehydrogenase assembly factor 2 family protein	1.72817
cds2896	WP_004680220.1	Cromosoma	invasion associated locus B family protein	1.03865
cds2907	WP_016733043.1	Cromosoma	hypothetical protein	1.95319
cds2908	WP_004671912.1	Cromosoma	pantetheine-phosphate adenylyltransferase	1.95153
cds2915	WP_016733047.1	Cromosoma	beta-ketoacyl-[acyl-carrier-protein] synthase II	1.62176
cds2916	WP_029531198.1	Cromosoma	transcriptional regulator	3.30442
cds2942	WP_016733073.1	Cromosoma	GntR family transcriptional regulator	1.55497
cds2943	WP_016733074.1	Cromosoma	agmatinase	2.23783
cds2959	WP_004671683.1	Cromosoma	membrane protein	1.18248
cds2961	WP_016733089.1	Cromosoma	TatD family deoxyribonuclease	1.29925
cds2962	WP_016733090.1	Cromosoma	methionine--tRNA ligase	1.00803
cds2969	WP_016733097.1	Cromosoma	RidA family protein	1.1135
cds2985	WP_016733108.1	Cromosoma	ATP-dependent helicase	2.59399
cds2989	WP_016733112.1	Cromosoma	citrate synthase/methylcitrate synthase	4.06524
cds2990	WP_016733113.1	Cromosoma	CTP synthase	1.14105
cds2991	WP_016733114.1	Cromosoma	preprotein translocase subunit SecG	2.00481
cds2996	WP_004674119.1	Cromosoma	hypothetical protein	1.909
cds3019	WP_016734499.1	Cromosoma	SulP family inorganic anion transporter	1.39203
cds3020	WP_010058543.1	Cromosoma	carbonic anhydrase	1.45523
cds3027	WP_016734492.1	Cromosoma	cytochrome c	1.24882
cds3028	WP_016734491.1	Cromosoma	LpqC%2C poly	2.11485
cds3062	WP_080956154.1	Cromosoma	hypothetical protein	1.48358
cds3063	WP_004669522.1	Cromosoma	4-oxalocrotonate tautomerase	1.16574
cds3070	WP_016734463.1	Cromosoma	Rrf2 family transcriptional regulator	1.11396
cds3071	WP_012483072.1	Cromosoma	hypothetical protein	1.52435
cds3072	WP_010022588.1	Cromosoma	hypothetical protein	1.5252
cds3076	WP_046977107.1	Cromosoma	betaine-aldehyde dehydrogenase	1.56955
cds3077	WP_012483077.1	Cromosoma	transcriptional regulator BetI	2.16158
cds3080	WP_016734459.1	Cromosoma	CBS domain-containing protein	1.5642
cds3084	WP_016734456.1	Cromosoma	transcriptional regulator	1.00049
cds3085	WP_016734455.1	Cromosoma	MFS transporter	1.0452
cds3112	WP_004676036.1	Cromosoma	cold-shock protein	1.86367
cds3113	WP_016734430.1	Cromosoma	hypothetical protein	1.90987
cds3114	WP_016734429.1	Cromosoma	30S ribosomal protein S21	1.53393
cds3118	WP_029531569.1	Cromosoma	MarR family transcriptional regulator	1.36626
cds3124	WP_016734422.1	Cromosoma	ABC transporter ATP-binding protein	1.28036
cds3144	WP_029531567.1	Cromosoma	glutathione S-transferase	2.53975
cds3145	WP_010025457.1	Cromosoma	TetR/AcrR family transcriptional regulator	2.27939
cds3165	WP_039751071.1	Cromosoma	MFS transporter	1.07469
cds3211	WP_016734358.1	Cromosoma	fatty acid desaturase	1.04129
cds3217	WP_016734352.1	Cromosoma	DUF983 domain-containing protein	2.27604
cds3218	WP_016734351.1	Cromosoma	LysR family transcriptional regulator	2.94846
cds3225	WP_016734345.1	Cromosoma	MFS transporter	1.43777
cds3226	WP_004670343.1	Cromosoma	hypothetical protein	1.62551
cds3227	WP_012483203.1	Cromosoma	DNA-binding response regulator	1.10664
cds3230	WP_016734344.1	Cromosoma	c-type cytochrome biogenesis protein CcmI	1.36515
cds3235	WP_012483209.1	Cromosoma	PDZ domain-containing protein	2.80582
cds3236	WP_037113567.1	Cromosoma	DNA-binding response regulator	1.99169
cds3237	WP_012483211.1	Cromosoma	sensor histidine kinase	1.04068
cds3244	WP_010035016.1	Cromosoma	hypothetical protein	3.9671
cds3247	WP_016734334.1	Cromosoma	AcrB/AcrD/AcrF family protein	1.13737
cds3248	WP_016734333.1	Cromosoma	efflux RND transporter periplasmic adaptor subunit	1.4207
cds3254	WP_039751042.1	Cromosoma	Lrp/AsnC family transcriptional regulator	1.42506
cds3256	WP_012483227.1	Cromosoma	MFS transporter	1.13512
cds3265	WP_016734320.1	Cromosoma	membrane protein	1.26024
cds3272	WP_010009317.1	Cromosoma	hypothetical protein	1.71048
cds3299	WP_003574261.1	Cromosoma	DNA-directed RNA polymerase subunit omega	1.42833
cds3301	WP_004675049.1	Cromosoma	DUF3563 domain-containing protein	3.98549
cds3302	WP_012483260.1	Cromosoma	DUF2062 domain-containing protein	2.74493
cds3306	WP_016734296.1	Cromosoma	GTPase Era	1.0329
cds3312	WP_029531551.1	Cromosoma	HD domain-containing protein	1.39033
cds3335	WP_016734272.1	Cromosoma	hypothetical protein	2.24774
cds3336	WP_016734271.1	Cromosoma	EamA family transporter RarD	1.33769
cds3341	WP_016734266.1	Cromosoma	GFA family protein	1.34137
cds3342	WP_016734265.1	Cromosoma	hypothetical protein	1.69601
cds3343	WP_016734264.1	Cromosoma	cysteine--tRNA ligase	1.76004
cds3352	WP_016734256.1	Cromosoma	50S ribosomal protein L9	1.66719
cds3354	WP_004680498.1	Cromosoma	30S ribosomal protein S18	2.93145
cds3355	WP_004680499.1	Cromosoma	30S ribosomal protein S6	3.44063
cds3384	WP_029531544.1	Cromosoma	ABC transporter ATP-binding protein	1.12338
cds3388	WP_004680549.1	Cromosoma	nucleoside-diphosphate kinase	1.71593
cds3389	WP_016734230.1	Cromosoma	hypothetical protein	1.91076
cds3390	WP_016734229.1	Cromosoma	hypothetical protein	2.41866
cds3391	WP_046977115.1	Cromosoma	branched-chain amino acid ABC transporter permease	1.45352
cds3401	WP_046977116.1	Cromosoma	molybdopterin oxidoreductase family protein	1.14537
cds3402	WP_012483336.1	Cromosoma	NUDIX domain-containing protein	1.13496
cds3403	WP_029531540.1	Cromosoma	alpha-D-ribose 1-methylphosphonate 5-triphosphate diphosphatase	1.02633
cds3404	WP_016734217.1	Cromosoma	phosphoribosylglycinamide formyltransferase	1.44495
cds3405	WP_016734216.1	Cromosoma	phosphoribosylformylglycinamidine cyclo-ligase	1.54531
cds3409	WP_004673739.1	Cromosoma	exopolyphosphatase	1.02166
cds3415	WP_029531536.1	Cromosoma	aspartate--tRNA ligase	2.16966
cds3423	WP_016734203.1	Cromosoma	EamA/RhaT family transporter	1.3707
cds3426	WP_016734201.1	Cromosoma	porphobilinogen synthase	1.40933
cds3441	WP_012483354.1	Cromosoma	serine hydroxymethyltransferase	1.05559
cds3457	WP_016734173.1	Cromosoma	hypothetical protein	1.55279
cds3458	WP_004674116.1	Cromosoma	6%2C7-dimethyl-8-ribityllumazine synthase	1.23462
cds3476	gbkey=CDS	Cromosoma	hypothetical protein	1.00172
cds3484	WP_046977121.1	Cromosoma	2-isopropylmalate synthase	1.78282
cds3527	WP_012484718.1	Cromosoma	MarR family transcriptional regulator	1.66486
cds3528	WP_012484719.1	Cromosoma	ribosome biogenesis GTPase Der	1.21626
cds3529	WP_016733755.1	Cromosoma	membrane protein	1.93895
cds3531	WP_016733756.1	Cromosoma	polysaccharide deacetylase	1.1207
cds3534	WP_012484723.1	Cromosoma	PadR family transcriptional regulator	4.22614
cds3535	WP_029531442.1	Cromosoma	hypothetical protein	1.96305
cds3547	WP_012484733.1	Cromosoma	hypothetical protein	1.2623
cds3569	WP_016733789.1	Cromosoma	5-methylaminomethyl-2-thiouridine methyltransferase	1.13842
cds3572	WP_016733791.1	Cromosoma	MFS transporter	2.43312
cds3573	WP_016733792.1	Cromosoma	dihydrodipicolinate synthase family protein	7.21927
cds3574	WP_016733793.1	Cromosoma	LacI family DNA-binding transcriptional regulator	1.41166
cds3576	WP_029531450.1	Cromosoma	RNA helicase	2.78069
cds3577	WP_016733796.1	Cromosoma	EamA/RhaT family transporter	1.27314
cds3583	WP_012484826.1	Cromosoma	dihydroxy-acid dehydratase	1.14315
cds3584	WP_016733800.1	Cromosoma	aldehyde dehydrogenase family protein	1.09409
cds3585	WP_012484827.1	Cromosoma	hypothetical protein	1.00576
cds3591	WP_016733803.1	Cromosoma	hypothetical protein	1.20354
cds3622	WP_011426430.1	Cromosoma	UDP-glucose 4-epimerase	1.6492
cds3623	WP_016733829.1	Cromosoma	glycosyl transferase	1.60806
cds3686	WP_046977124.1	Cromosoma	glutamine amidotransferase	1.45897
cds3687	WP_016733877.1	Cromosoma	multidrug transporter	1.20117
cds3708	WP_016733890.1	Cromosoma	FAD-binding protein	1.70781
cds3709	WP_016733891.1	Cromosoma	NAD-dependent dihydropyrimidine dehydrogenase subunit PreA	2.79641
cds3710	WP_080956157.1	Cromosoma	hypothetical protein	2.87474
cds3736	WP_029531484.1	Cromosoma	Zn-dependent hydrolase	1.1996
cds3737	WP_016733917.1	Cromosoma	DUF559 domain-containing protein	2.14962
cds3738	WP_016733918.1	Cromosoma	dihydropyrimidinase	2.67265
cds3740	WP_004673032.1	Cromosoma	ABC transporter ATP-binding protein	2.05664
cds3741	WP_016733919.1	Cromosoma	ABC transporter permease	1.13889
cds3767	WP_004675671.1	Cromosoma	branched-chain amino acid ABC transporter substrate-binding protein	1.11433
cds3768	WP_004675675.1	Cromosoma	hypothetical protein	1.04595
cds3769	WP_037116131.1	Cromosoma	ABC transporter ATP-binding protein	1.44083
cds3770	WP_004675679.1	Cromosoma	ABC transporter ATP-binding protein	1.20815
cds3776	WP_016733935.1	Cromosoma	hypothetical protein	1.15901
cds3787	WP_004675735.1	Cromosoma	hypothetical protein	1.71964
cds3788	WP_029531492.1	Cromosoma	RluA family pseudouridine synthase	1.06654
cds3796	WP_016733946.1	Cromosoma	multidrug efflux RND transporter permease subunit	1.35197
cds3797	WP_004675748.1	Cromosoma	MexE family multidrug efflux RND transporter periplasmic adaptor subunit	1.80035
cds3798	WP_029531493.1	Cromosoma	alpha/beta hydrolase	2.21116
cds3804	WP_016733951.1	Cromosoma	EmrB/QacA family drug resistance transporter	1.51048
cds3805	WP_016733952.1	Cromosoma	HlyD family secretion protein	2.63839
cds3806	WP_016733953.1	Cromosoma	MarR family transcriptional regulator	3.24111
cds3821	WP_016733963.1	Cromosoma	sugar kinase	1.55312
cds3823	WP_016733965.1	Cromosoma	sugar ABC transporter permease	1.28619
cds3824	WP_011426608.1	Cromosoma	carbohydrate ABC transporter permease	1.15469
cds3825	WP_016733966.1	Cromosoma	SIS domain-containing protein	1.3571
cds3837	WP_012485039.1	Cromosoma	NADH-quinone oxidoreductase subunit C 2	1.26568
cds3852	WP_016737122.1	Cromosoma	phosphoribosyltransferase	1.11997
cds3856	WP_012485052.1	Cromosoma	efflux RND transporter periplasmic adaptor subunit	1.33734
cds3857	WP_016737126.1	Cromosoma	multidrug efflux RND transporter permease subunit	1.22133
cds3859	WP_016737128.1	Cromosoma	LacI family transcriptional regulator	1.71735
cds3860	WP_016737129.1	Cromosoma	ABC transporter substrate-binding protein	1.37804
cds3866	WP_016737135.1	Cromosoma	amidohydrolase	1.64665
cds3867	WP_016737136.1	Cromosoma	tripartite tricarboxylate transporter permease	2.82009
cds3868	WP_004672369.1	Cromosoma	tripartite tricarboxylate transporter TctB family protein	2.10393
cds3869	WP_016737137.1	Cromosoma	hypothetical protein	1.02274
cds3891	WP_016737156.1	Cromosoma	phosphoglycerate dehydrogenase	1.35852
cds3892	WP_016737157.1	Cromosoma	phosphoserine transaminase	1.86626
cds3894	WP_012485090.1	Cromosoma	phosphoglucosamine mutase	1.4901
cds3912	WP_012485106.1	Cromosoma	YebC/PmpR family DNA-binding transcriptional regulator	1.12948
cds3925	WP_016737177.1	Cromosoma	bifunctional lysylphosphatidylglycerol flippase/synthetase MprF	1.28499
cds3946	WP_003566413.1	Cromosoma	50S ribosomal protein L31	3.2203
cds3954	WP_012485142.1	Cromosoma	inositol monophosphatase	2.67637
cds3975	WP_010028538.1	Cromosoma	DUF465 domain-containing protein	1.61019
cds3978	WP_003582204.1	Cromosoma	50S ribosomal protein L36	2.73658
cds3988	WP_012485171.1	Cromosoma	pyruvate kinase	1.0055
cds3992	WP_003585771.1	Cromosoma	DUF2312 domain-containing protein	1.66395
cds4000	WP_016737223.1	Cromosoma	homospermidine synthase	1.19107
cds4015	gbkey=CDS	Cromosoma	hypothetical protein	3.24185
cds4016	WP_012484605.1	Cromosoma	hypothetical protein	1.83184
cds4018	WP_012484607.1	Cromosoma	carbamoyl-phosphate synthase small subunit	1.4583
cds4022	WP_010003937.1	Cromosoma	antibiotic biosynthesis monooxygenase	1.15111
cds4029	WP_016733674.1	Cromosoma	carbamoyl-phosphate synthase large subunit	1.82521
cds4032	WP_004672775.1	Cromosoma	transcription elongation factor GreA	1.24882
cds4033	WP_029531415.1	Cromosoma	glycosyltransferase family 1 protein	1.21032
cds4034	WP_012484619.1	Cromosoma	C4-dicarboxylate transporter	2.90595
cds4037	WP_029531418.1	Cromosoma	Lrp/AsnC family transcriptional regulator	1.55623
cds4040	WP_029531419.1	Cromosoma	transcriptional regulator	2.24769
cds4049	WP_029531422.1	Cromosoma	galactosyltransferase	1.56572
cds4050	WP_012484631.1	Cromosoma	pyridoxal phosphate-dependent aminotransferase	1.08087
cds4058	WP_029531425.1	Cromosoma	BA14K family protein	1.05343
cds4076	WP_004680140.1	Cromosoma	ribose-phosphate pyrophosphokinase	1.26425
cds4078	WP_012484653.1	Cromosoma	50S ribosomal protein L25	1.12887
cds4084	WP_010031314.1	Cromosoma	redox-regulated ATPase YchF	1.06239
cds4091	WP_012484665.1	Cromosoma	ubiquinol-cytochrome c reductase iron-sulfur subunit	1.4596
cds4092	WP_016733714.1	Cromosoma	endonuclease	1.35564
cds4094	WP_012484668.1	Cromosoma	CopG family transcriptional regulator	2.12912
cds4117	WP_016733591.1	Cromosoma	50S ribosomal protein L11 methyltransferase	1.25875
cds4128	WP_004668803.1	Cromosoma	UDP-3-O-acyl-N-acetylglucosamine deacetylase	2.29464
cds4149	WP_029531397.1	Cromosoma	N-acetylmuramoyl-L-alanine amidase	1.09011
cds4162	WP_016733612.1	Cromosoma	methylenetetrahydrofolate reductase [NAD(P)H]	2.40282
cds4163	WP_012484523.1	Cromosoma	methyltransferase domain-containing protein	1.32672
cds4172	WP_016733618.1	Cromosoma	DUF4432 domain-containing protein	1.28544
cds4179	WP_016733622.1	Cromosoma	N-formylglutamate amidohydrolase	1.53503
cds4184	WP_012484540.1	Cromosoma	ABC transporter ATP-binding protein	1.01035
cds4185	WP_012484541.1	Cromosoma	ABC transporter ATP-binding protein	3.12337
cds4186	WP_012484542.1	Cromosoma	gfo/Idh/MocA family oxidoreductase	3.55121
cds4187	WP_012484543.1	Cromosoma	carbohydrate ABC transporter permease	2.70764
cds4188	WP_016733625.1	Cromosoma	sugar ABC transporter permease	2.38234
cds4189	WP_016733626.1	Cromosoma	carbohydrate ABC transporter substrate-binding protein	2.56293
cds4190	WP_016733627.1	Cromosoma	hypothetical protein	2.66187
cds4191	WP_016733628.1	Cromosoma	N-acetylglucosamine kinase	2.81083
cds4192	WP_016733629.1	Cromosoma	GntR family transcriptional regulator	1.86618
cds4195	WP_029531404.1	Cromosoma	methionine synthase	2.51487
cds4216	WP_016733643.1	Cromosoma	hypothetical protein	2.35217
cds4229	WP_029531410.1	Cromosoma	YjbQ family protein	1.34866
cds4242	WP_029531372.1	Cromosoma	hypothetical protein	1.1705
cds4255	WP_016733518.1	Cromosoma	PLP-dependent aminotransferase family protein	1.24441
cds4271	WP_016733533.1	Cromosoma	ABC transporter permease	1.12732
cds4272	WP_039750664.1	Cromosoma	glycerol-3-phosphate transporter permease	1.57601
cds4273	WP_016733534.1	Cromosoma	ABC transporter substrate-binding protein	1.82817
cds4274	WP_016733535.1	Cromosoma	sn-glycerol-3-phosphate import ATP-binding protein UgpC	1.76701
cds4275	WP_016733536.1	Cromosoma	sugar-binding transcriptional regulator	1.32466
cds4282	WP_016733540.1	Cromosoma	NAD(P)/FAD-dependent oxidoreductase	1.26269
cds4286	WP_016733543.1	Cromosoma	aspartate/glutamate racemase family protein	2.10985
cds4287	WP_016733544.1	Cromosoma	GNAT family N-acetyltransferase	3.64981
cds4288	WP_016733545.1	Cromosoma	TetR/AcrR family transcriptional regulator	1.64123
cds4311	WP_004677216.1	Cromosoma	acetolactate synthase small subunit	1.06145
cds4312	WP_016733560.1	Cromosoma	acetolactate synthase 3 large subunit	1.65978
cds4332	WP_010023406.1	Cromosoma	ArsR family transcriptional regulator	1.08025
cds4340	WP_016733576.1	Cromosoma	efflux RND transporter periplasmic adaptor subunit	1.40455
cds4348	WP_016733580.1	Cromosoma	VOC family protein	1.0844
cds4381	WP_012484239.1	Cromosoma	transcriptional regulator	1.24142
cds4403	WP_029531341.1	Cromosoma	4-hydroxy-tetrahydrodipicolinate reductase	1.12724
cds4414	WP_012484272.1	Cromosoma	protocatechuate 3%2C4-dioxygenase	1.99865
cds4418	WP_010024558.1	Cromosoma	hypothetical protein	3.29786
cds4419	WP_012484275.1	Cromosoma	hypothetical protein	2.44076
cds4434	WP_029531346.1	Cromosoma	metal-dependent hydrolase	1.42863
cds4514	WP_016733488.1	Cromosoma	TetR/AcrR family transcriptional regulator	1.00133
cds4517	WP_016733492.1	Cromosoma	nucleotidyltransferase domain-containing protein	1.1859
cds4523	WP_046977141.1	Cromosoma	hypothetical protein	1.02894
cds4525	WP_004679676.1	Cromosoma	transcriptional repressor	1.00881
cds4526	WP_012484378.1	Cromosoma	zinc ABC transporter permease	1.36951
cds4527	WP_016733499.1	Cromosoma	metal ABC transporter ATP-binding protein	1.80679
cds4529	WP_016733501.1	Cromosoma	GTP-binding protein	1.60167
cds4530	WP_080956170.1	Cromosoma	hypothetical protein	2.32927
cds4531	WP_016733502.1	Cromosoma	membrane protein	2.147
cds4532	gbkey=CDS	Cromosoma	cobaltochelatase subunit CobN	1.23426
cds4572	WP_016733355.1	Cromosoma	DUF1442 domain-containing protein	1.73662
cds4573	WP_016733357.1	Cromosoma	siderophore-interacting protein	1.07823
cds4586	WP_004672825.1	Cromosoma	membrane protein	1.284
cds4597	WP_004677801.1	Cromosoma	glutamate synthase subunit beta	1.2609
cds4598	WP_016737236.1	Cromosoma	glutamate synthase large subunit	1.63263
cds4601	WP_016737238.1	Cromosoma	bile acid:sodium symporter	2.23755
cds4603	WP_012485198.1	Cromosoma	alpha/beta hydrolase	1.26122
cds4607	WP_020465417.1	Cromosoma	hypothetical protein	2.12046
cds4614	WP_029532212.1	Cromosoma	DUF475 domain-containing protein	1.39934
cds4645	WP_003585885.1	Cromosoma	30S ribosomal protein S21	2.08167
cds4676	WP_016737294.1	Cromosoma	ketohydroxyglutarate aldolase	1.06423
cds4679	WP_029532244.1	Cromosoma	rhodanese domain-containing protein	1.54211
cds4691	WP_029532252.1	Cromosoma	LacI family DNA-binding transcriptional regulator	1.03721
cds4692	WP_016737305.1	Cromosoma	MFS transporter	1.80829
cds4693	WP_012485276.1	Cromosoma	HlyD family secretion protein	1.91216
cds4694	WP_012485277.1	Cromosoma	TetR/AcrR family transcriptional regulator	1.14436
cds4695	WP_016737306.1	Cromosoma	AraC family transcriptional regulator	1.49659
cds4697	WP_016737308.1	Cromosoma	glutamate--tRNA ligase	1.09047
cds4702	WP_012485284.1	Cromosoma	ABC transporter ATP-binding protein	3.34506
cds4703	WP_012485285.1	Cromosoma	ABC transporter permease	2.54482
cds4704	WP_004678022.1	Cromosoma	ABC transporter permease	1.71591
cds4715	WP_016737317.1	Cromosoma	TetR/AcrR family transcriptional regulator	1.40862
cds4730	WP_016737327.1	Cromosoma	AcrB/AcrD/AcrF family protein	2.10574
cds4731	WP_016737328.1	Cromosoma	efflux RND transporter periplasmic adaptor subunit	2.45612
cds4732	WP_012485310.1	Cromosoma	TetR/AcrR family transcriptional regulator	1.2748
cds4736	WP_016737331.1	Cromosoma	L-arabinose ABC transporter permease AraH	1.23775
cds4737	WP_016737332.1	Cromosoma	L-arabinose ABC transporter ATP-binding protein AraG	2.88216
cds4738	WP_016737333.1	Cromosoma	arabinose ABC transporter substrate-binding protein	4.07042
cds4739	WP_029532271.1	Cromosoma	FadR family transcriptional regulator	3.47101
cds4740	WP_016737335.1	Cromosoma	galactonate dehydratase	2.29158
cds4753	WP_016737530.1	Cromosoma	7-cyano-7-deazaguanine synthase QueC	1.54057
cds4754	WP_016737529.1	Cromosoma	6-carboxytetrahydropterin synthase QueD	1.03882
cds4768	WP_012485342.1	Cromosoma	protease	1.06486
cds4784	WP_012485357.1	Cromosoma	DUF4167 domain-containing protein	1.84251
cds4788	WP_004671807.1	Cromosoma	aspartate kinase	1.77381
cds4807	WP_012485375.1	Cromosoma	TetR/AcrR family transcriptional regulator	1.16885
cds4808	WP_012485376.1	Cromosoma	MFS transporter	1.441
cds4827	WP_012485393.1	Cromosoma	argininosuccinate lyase	1.53684
cds4832	WP_004671390.1	Cromosoma	hypoxanthine phosphoribosyltransferase	1.15551
cds4849	WP_004679586.1	Cromosoma	50S ribosomal protein L28	3.18762
cds4850	WP_016736456.1	Cromosoma	membrane protein	2.793
cds4853	WP_016736453.1	Cromosoma	cobaltochelatase subunit CobT	1.13889
cds4855	WP_004679597.1	Cromosoma	molecular chaperone DnaJ	1.25737
cds4899	WP_016736406.1	Cromosoma	LacI family transcriptional regulator	2.31806
cds4905	WP_016736403.1	Cromosoma	arginase	3.86491
cds4906	WP_012485447.1	Cromosoma	ornithine--oxo-acid transaminase	5.47067
cds4913	WP_016736400.1	Cromosoma	formate dehydrogenase subunit beta	1.35872
cds4920	WP_012485458.1	Cromosoma	ABC transporter permease	1.0497
cds4928	WP_016736393.1	Cromosoma	ATP synthase subunit gamma	1.09293
cds4929	WP_016736392.1	Cromosoma	ATP synthase subunit alpha	1.41505
cds4930	WP_016736391.1	Cromosoma	F0F1 ATP synthase subunit delta	2.19082
cds4939	WP_012485476.1	Cromosoma	cytochrome b	2.15065
cds4941	WP_016736383.1	Cromosoma	KR domain-containing protein	1.02105
cds4942	WP_016736382.1	Cromosoma	hypothetical protein	1.30229
cds4943	WP_016736381.1	Cromosoma	DUF4241 domain-containing protein	1.10542
cds4944	WP_016736380.1	Cromosoma	dihydrolipoyllysine-residue succinyltransferase	1.06931
cds4946	WP_012485483.1	Cromosoma	2-oxoglutarate dehydrogenase E1 component	1.2621
cds4947	WP_016736377.1	Cromosoma	succinate--CoA ligase subunit alpha	1.22998
cds4948	WP_016736376.1	Cromosoma	DUF1579 domain-containing protein	1.05916
cds4976	WP_012485506.1	Cromosoma	translational GTPase TypA	2.99146
cds4980	WP_016736350.1	Cromosoma	NUDIX hydrolase	1.35973
cds4981	WP_016736349.1	Cromosoma	hypothetical protein	2.82437
cds4982	WP_016736348.1	Cromosoma	adenylosuccinate synthase	1.51779
cds4987	WP_016736344.1	Cromosoma	ABC transporter ATP-binding protein	1.25799
cds4988	WP_016736343.1	Cromosoma	ABC transporter permease	1.29916
cds4989	WP_016736342.1	Cromosoma	ABC transporter substrate-binding protein	1.65755
cds4990	WP_012485518.1	Cromosoma	23S rRNA (adenine(2503)-C(2))-methyltransferase RlmN	1.89135
cds4993	WP_012485520.1	Cromosoma	RNA polymerase sigma factor RpoE	1.00947
cds5008	WP_029531880.1	Cromosoma	heme transporter HemC	1.48898
cds5009	WP_016736335.1	Cromosoma	heme exporter protein CcmD	1.25648
cds5017	gbkey=CDS	Cromosoma	hypothetical protein	1.78589
cds5023	WP_012485544.1	Cromosoma	50S ribosomal protein L19	2.923
cds5026	WP_016736326.1	Cromosoma	3-isopropylmalate dehydratase large subunit	1.97637
cds5059	WP_016736306.1	Cromosoma	ABC transporter ATP-binding protein	1.08735
cds5079	WP_029531871.1	Cromosoma	polyprenyl synthetase family protein	1.0267
cds5083	WP_003543812.1	Cromosoma	50S ribosomal protein L32	3.48082
cds5092	WP_011427210.1	Cromosoma	ferredoxin family protein	1.71607
cds5098	WP_012485603.1	Cromosoma	thiamine diphosphokinase	1.10465
cds5103	WP_012485607.1	Cromosoma	GntR family transcriptional regulator	1.83153
cds5104	WP_016736281.1	Cromosoma	SIS domain-containing protein	2.56589
cds5105	WP_016736280.1	Cromosoma	N-acetylglucosamine-6-phosphate deacetylase	2.63337
cds5106	WP_016736279.1	Cromosoma	sugar isomerase domain-containing protein	2.12006
cds5107	WP_016736278.1	Cromosoma	FAD-binding oxidoreductase	1.31392
cds5112	WP_008528334.1	Cromosoma	elongation factor P	2.35551
cds5113	WP_016736273.1	Cromosoma	EF-P lysine aminoacylase GenX	1.00339
cds5128	WP_016736260.1	Cromosoma	iron ABC transporter substrate-binding protein	1.23277
cds5129	WP_016736259.1	Cromosoma	iron ABC transporter permease	1.37119
cds5134	WP_016736255.1	Cromosoma	TetR/AcrR family transcriptional regulator	1.94338
cds5135	WP_016736254.1	Cromosoma	50S ribosomal protein L21	1.94856
cds5136	WP_004676172.1	Cromosoma	50S ribosomal protein L27	1.72439
cds5137	WP_012485632.1	Cromosoma	N-acetyltransferase	1.10494
cds5158	WP_004675276.1	Cromosoma	Zn-dependent protease	1.21995
cds5162	WP_016736236.1	Cromosoma	VOC family protein	1.22857
cds5165	WP_010024973.1	Cromosoma	3-isopropylmalate dehydrogenase	1.32193
cds5172	WP_029531858.1	Cromosoma	hypothetical protein	2.10171
cds5173	WP_016736226.1	Cromosoma	aspartate-semialdehyde dehydrogenase	1.91431
cds5187	WP_010019544.1	Cromosoma	DUF1013 domain-containing protein	2.90465
cds5199	WP_008528706.1	Cromosoma	transcription termination factor Rho	1.65004
cds5222	WP_016736193.1	Cromosoma	phosphoribosylanthranilate isomerase	1.20865
cds5233	WP_016736183.1	Cromosoma	adenosylhomocysteinase	2.11762
cds5250	WP_012482121.1	Cromosoma	imidazoleglycerol-phosphate dehydratase	1.50353
cds5278	WP_016735212.1	Cromosoma	TetR/AcrR family transcriptional regulator	1.65039
cds5282	WP_039751506.1	Cromosoma	gfo/Idh/MocA family oxidoreductase	1.27935
cds5295	WP_012482163.1	Cromosoma	30S ribosomal protein S1	1.82786
cds5297	WP_012482165.1	Cromosoma	TIGR02300 family protein	2.1744
cds5341	WP_016735158.1	Cromosoma	class I SAM-dependent methyltransferase	1.69509
cds5342	WP_016735157.1	Cromosoma	polyribonucleotide nucleotidyltransferase	1.45224
cds5343	WP_029531690.1	Cromosoma	30S ribosomal protein S15	1.72944
cds5345	WP_016735154.1	Cromosoma	tRNA pseudouridine(55) synthase TruB	1.84107
cds5346	WP_012482211.1	Cromosoma	ribosome-binding factor A	1.97409
cds5355	WP_016733259.1	Cromosoma	transketolase	1.99389
cds5356	WP_012484068.1	Cromosoma	ABC transporter permease	1.44649
cds5383	WP_016733282.1	Cromosoma	S-adenosylmethionine-dependent methyltransferase	1.19752
cds5404	WP_016733298.1	Cromosoma	nicotinate-nucleotide--dimethylbenzimidazole phosphoribosyltransferase	1.57677
cds5412	WP_016733305.1	Cromosoma	short chain dehydrogenase	1.27224
cds5413	WP_004678436.1	Cromosoma	ABC transporter permease	1.10437
cds5414	WP_016733306.1	Cromosoma	ABC transporter ATP-binding protein	1.83377
cds5449	WP_016733325.1	Cromosoma	membrane protein	1.23944
cds5451	end_range=100646,.	Cromosoma	cobaltochelatase subunit CobN	1.27533
cds5453	WP_016733208.1	Cromosoma	DUF1062 domain-containing protein	1.37462
cds5454	WP_008525884.1	Cromosoma	RNA polymerase-binding protein DksA	1.41074
cds5461	WP_029531256.1	Cromosoma	dihydropteroate synthase	1.16537
cds5475	WP_016733219.1	Cromosoma	MFS transporter	1.34348
cds5483	WP_029531262.1	Cromosoma	3-deoxy-7-phosphoheptulonate synthase	1.40191
cds5491	WP_016733231.1	Cromosoma	ABC transporter ATP-binding protein	1.319
cds5492	WP_016733233.1	Cromosoma	3-deoxy-7-phosphoheptulonate synthase class II	1.40594
cds5517	WP_016733120.1	Cromosoma	N-acetyltransferase	1.01795
cds5564	WP_012483948.1	Cromosoma	RluA family pseudouridine synthase	2.02004
cds5567	WP_016733153.1	Cromosoma	DUF1775 domain-containing protein	1.0512
cds5568	WP_016733154.1	Cromosoma	hypothetical protein	1.49071
cds5587	WP_004675609.1	Cromosoma	tyrosine--tRNA ligase	2.02341
cds5594	WP_029531237.1	Cromosoma	ATP-dependent helicase	1.69595
cds5606	WP_004676258.1	Cromosoma	serine hydrolase family protein	1.17552
cds5610	WP_016733183.1	Cromosoma	RNA 2'-phosphotransferase	1.1563
cds5612	WP_046977151.1	Cromosoma	hypothetical protein	1.04764
cds5613	WP_016733185.1	Cromosoma	DUF1127 domain-containing protein	1.43881
cds5614	WP_016733186.1	Cromosoma	PLP-dependent aminotransferase family protein	2.75218
cds5618	WP_012483988.1	Cromosoma	hypothetical protein	1.03375
cds5621	WP_012483991.1	Cromosoma	Bcr/CflA family drug resistance efflux transporter	1.34563
cds5626	WP_012483995.1	Cromosoma	tRNA 2-thiocytidine(32) synthetase TtcA	1.06757
cds5627	WP_010024905.1	Cromosoma	glutaminase	1.92271
cds5628	WP_004676212.1	Cromosoma	30S ribosomal protein S4	3.17963
cds5646	gbkey=CDS	Cromosoma	translation initiation factor IF-2	1.50833
cds5647	WP_004673396.1	Cromosoma	DNA-binding protein	1.63081
cds5648	WP_004673395.1	Cromosoma	transcription termination/antitermination protein NusA	2.41668
cds5649	WP_004673394.1	Cromosoma	ribosome maturation factor RimP	3.05886
cds5667	WP_004672641.1	Cromosoma	cytochrome c family protein	1.17231
cds5703	WP_004673514.1	Cromosoma	carbon-phosphorus lyase complex subunit PhnJ	1.31479
cds5704	WP_016735120.1	Cromosoma	carbon-phosphorus lyase complex subunit PhnI	1.88254
cds5705	WP_016735119.1	Cromosoma	phosphonate C-P lyase system protein PhnH	1.19262
cds5706	WP_016735118.1	Cromosoma	phosphonate C-P lyase system protein PhnG	2.69347
cds5707	WP_016735117.1	Cromosoma	phosphonate metabolism transcriptional regulator PhnF	1.86246
cds5710	WP_004673526.1	Cromosoma	ABC transporter ATP-binding protein	1.36345
cds5729	WP_004673556.1	Cromosoma	ABC transporter permease	1.08907
cds5730	WP_004673557.1	Cromosoma	cytidine deaminase	1.12525
cds5732	WP_004673564.1	Cromosoma	deoxyribose-phosphate aldolase	1.13341
cds5747	WP_004668690.1	Cromosoma	CpaF family protein	1.27792
cds5776	WP_016735074.1	Cromosoma	elongation factor 4	1.54531
cds5778	WP_016735072.1	Cromosoma	XRE family transcriptional regulator	2.13781
cds5789	WP_003570998.1	Cromosoma	50S ribosomal protein L35	3.11754
cds5790	WP_004673860.1	Cromosoma	50S ribosomal protein L20	2.89411
cds5791	WP_016735064.1	Cromosoma	phenylalanine--tRNA ligase subunit alpha	1.89128
cds5815	WP_016735042.1	Cromosoma	methylated-DNA--[protein]-cysteine S-methyltransferase	1.0652
cds5825	WP_016735033.1	Cromosoma	GMP synthase (glutamine-hydrolyzing)	1.46205
cds5830	WP_016735029.1	Cromosoma	hypothetical protein	1.03959
cds5858	WP_016735006.1	Cromosoma	peptide chain release factor 3	2.19947
cds5864	WP_016735000.1	Cromosoma	MFS transporter	1.30504
cds5865	WP_016734999.1	Cromosoma	FadR family transcriptional regulator	1.21979
cds5882	WP_008524652.1	Cromosoma	30S ribosomal protein S20	3.46013
cds5895	WP_012482410.1	Cromosoma	methionine adenosyltransferase	2.84
cds5905	WP_012482416.1	Cromosoma	tRNA (adenosine(37)-N6)-threonylcarbamoyltransferase complex dimerization subunit type 1 TsaB	1.00232
cds5908	WP_004679829.1	Cromosoma	tryptophan--tRNA ligase	1.65121
cds5938	WP_029531659.1	Cromosoma	peptide deformylase	2.06509
cds5947	WP_016734943.1	Cromosoma	calcium-binding protein	3.97266
cds5953	WP_012482454.1	Cromosoma	acetylglutamate kinase	1.6909
cds5958	WP_010017635.1	Cromosoma	hypothetical protein	1.40528
cds5959	WP_012482459.1	Cromosoma	hypothetical protein	1.64891
cds5960	WP_016737600.1	Cromosoma	cold-shock protein	1.1737
cds5962	WP_029531655.1	Cromosoma	membrane protein insertase YidC	1.05307
cds5963	WP_004673114.1	Cromosoma	ribonuclease P protein component	2.16113
cds5964	WP_008524438.1	Cromosoma	50S ribosomal protein L34	1.99082
cds5967	gbkey=CDS	Cromosoma	nuclease	1.73738
cds5971	WP_029531653.1	Cromosoma	hypothetical protein	1.14408
cds5981	WP_016734917.1	Cromosoma	competence protein TfoX	1.069
cds5982	WP_016734916.1	Cromosoma	nuclear transport factor 2 family protein	1.70242
cds5983	WP_010024680.1	Cromosoma	TetR/AcrR family transcriptional regulator	2.62285
cds5984	WP_016734915.1	Cromosoma	transcriptional regulator	1.14162
cds5988	WP_016734910.1	Cromosoma	NADP-dependent oxidoreductase	1.87716
cds5989	WP_016734909.1	Cromosoma	TetR/AcrR family transcriptional regulator	1.23431
cds5992	WP_016734907.1	Cromosoma	ROK family transcriptional regulator	2.10606
cds5993	WP_016734906.1	Cromosoma	sugar ABC transporter substrate-binding protein	1.41424
cds5994	WP_012482516.1	Cromosoma	ABC transporter permease	1.05479
cds6000	WP_012482521.1	Cromosoma	DUF1772 domain-containing protein	1.86959
cds6043	WP_012482561.1	Cromosoma	ornithine carbamoyltransferase	1.14968
cds6044	WP_012482562.1	Cromosoma	Hsp33 family molecular chaperone	1.72341
cds6047	WP_012482564.1	Cromosoma	O-succinylhomoserine sulfhydrylase	1.12999
cds6064	WP_016734859.1	Cromosoma	YitT family protein	2.25998
cds6081	WP_004675957.1	Cromosoma	cold-shock protein	1.95654
cds6083	WP_010010011.1	Cromosoma	GFA family protein	1.44759
cds6089	WP_016734842.1	Cromosoma	pyridoxal phosphate-dependent aminotransferase	1.14604
cds6106	WP_003545338.1	Cromosoma	translation initiation factor IF-1	1.43649
cds6133	WP_004674538.1	Cromosoma	LacI family transcriptional regulator	1.12665
cds6135	WP_012482641.1	Cromosoma	sugar ABC transporter substrate-binding protein	1.70897
cds6136	WP_016734810.1	Cromosoma	sugar ABC transporter ATP-binding protein	3.36533
cds6137	WP_016734809.1	Cromosoma	ABC transporter permease	2.96327
cds6156	WP_016734797.1	Cromosoma	protein translocase subunit SecDF	1.88109
cds6223	WP_016734763.1	Cromosoma	LacI family transcriptional regulator	1.08139
cds6230	WP_016734759.1	Cromosoma	phosphogluconate dehydratase	1.17723
cds6231	WP_016734758.1	Cromosoma	6-phosphogluconolactonase	1.05681
cds6232	WP_004673775.1	Cromosoma	glucose-6-phosphate dehydrogenase	1.91278
cds6249	WP_016734743.1	Cromosoma	PAS domain-containing sensor histidine kinase	1.48034
cds6250	WP_012482731.1	Cromosoma	phasin	4.18075
cds6259	WP_004676182.1	Cromosoma	peptide ABC transporter permease	1.06149
cds6260	WP_012482735.1	Cromosoma	dipeptide ABC transporter permease DppC	1.28007
cds6261	WP_016734733.1	Cromosoma	ABC transporter ATP-binding protein	1.60289
cds6262	WP_004676185.1	Cromosoma	ABC transporter ATP-binding protein	1.19803
cds6276	WP_016734719.1	Cromosoma	acylneuraminate cytidylyltransferase	1.02072
cds6288	WP_016734707.1	Cromosoma	glycosyl transferase	1.14583
cds6289	WP_016734706.1	Cromosoma	hypothetical protein	1.30399
cds6292	WP_016734703.1	Cromosoma	Ppx/GppA family phosphatase	1.0199
cds6297	WP_012482792.1	Cromosoma	IMP dehydrogenase	2.28478
cds6307	WP_016734694.1	Cromosoma	16S rRNA (uracil(1498)-N(3))-methyltransferase	1.18049
cds6308	WP_016734693.1	Cromosoma	inorganic phosphate transporter	1.30243
cds6312	WP_016734689.1	Cromosoma	glycolate oxidase subunit GlcE	1.08775
cds6325	WP_029531624.1	Cromosoma	histidine--tRNA ligase	1.38853
cds6337	WP_029531621.1	Cromosoma	isoleucine--tRNA ligase	1.67146
cds6339	WP_016734672.1	Cromosoma	nucleoside deaminase	1.03348
cds6366	WP_012482854.1	Cromosoma	magnesium transporter	1.06256
cds6369	WP_004675822.1	Cromosoma	F0F1 ATP synthase assembly protein	2.05033
cds6370	WP_010004512.1	Cromosoma	ATP synthase subunit A	1.66531
cds6375	WP_016734649.1	Cromosoma	radical SAM protein	1.22994
cds6376	WP_016734648.1	Cromosoma	glycosyl transferase	1.36103
cds6382	WP_004672609.1	Cromosoma	DUF2007 domain-containing protein	2.03455
cds6383	WP_016734642.1	Cromosoma	methyltransferase domain-containing protein	4.32949
cds6384	WP_016734641.1	Cromosoma	divalent metal cation transporter	4.76489
cds6394	WP_016734634.1	Cromosoma	phosphoribosylamine--glycine ligase	1.03256
cds6406	WP_029531614.1	Cromosoma	threonylcarbamoyl-AMP synthase	1.13879
cds6416	WP_016734618.1	Cromosoma	oxidoreductase	3.33623
cds6417	WP_016734617.1	Cromosoma	transcriptional regulator	1.91567
cds6419	WP_029531612.1	Cromosoma	TlyA family rRNA (cytidine-2'-O)-methyltransferase	1.04857
cds6429	WP_016734606.1	Cromosoma	MCD%2C Malonyl-CoA decarboxylase MCD	1.94304
cds6443	WP_016734594.1	Cromosoma	ABC transporter ATP-binding protein	1.15969
cds6449	gbkey=CDS	Cromosoma	hypothetical protein	1.30243
cds6450	WP_012482921.1	Cromosoma	histidine phosphatase family protein	1.77492
cds6451	WP_016734590.1	Cromosoma	enoyl-[acyl-carrier-protein] reductase FabI	2.16345
cds6481	WP_016734570.1	Cromosoma	ABC transporter ATP-binding protein	1.41008
cds6482	WP_010021814.1	Cromosoma	metal ABC transporter permease	1.34144
cds6489	WP_016734566.1	Cromosoma	threonine synthase	1.37308
cds6491	WP_016734564.1	Cromosoma	haloacid dehalogenase	1.82744
cds6507	WP_016734549.1	Cromosoma	fucose-binding protein	1.02891
cds6508	WP_016734548.1	Cromosoma	LacI family transcriptional regulator	1.31964

## Sheet: TableS4
Supplementary table S4. Up-regulated genes of R. phaseoli Ch24-10 shared in all exudates transcriptomes (compared to Ch24-10 in Fahraeus solution).				LogFC	LogFC	LogFC
ORF	NCBI Protein ID	Locus	Product	Maize exudates	Bean exudate	Milpa exudates
cds21	WP_016736932.1	Plasmid_A	amino acid synthesis family protein	5.36082	4.6663	4.00944
cds22	WP_016736931.1	Plasmid_A	alpha/beta hydrolase	5.20262	4.21031	3.82996
cds23	WP_016736930.1	Plasmid_A	flavin monooxygenase/reductase	4.0933	3.16698	2.95014
cds24	WP_016736929.1	Plasmid_A	LLM class flavin-dependent oxidoreductase	2.95599	1.95911	2.03888
cds41	WP_016736911.1	Plasmid_A	SIS domain-containing protein	1.4788	1.65227	1.31846
cds59	WP_016736894.1	Plasmid_A	LacI family transcriptional regulator	5.04825	3.11901	3.25423
cds60	WP_016736893.1	Plasmid_A	peptide ABC transporter	4.32516	1.89652	1.89334
cds118	WP_029532041.1	Plasmid_A	hypothetical protein	4.89752	2.06016	2.08453
cds122	WP_016736836.1	Plasmid_A	sn-glycerol-3-phosphate import ATP-binding protein UgpC	1.00007	1.14573	<1
cds123	WP_016736835.1	Plasmid_A	glycerophosphoryl diester phosphodiesterase	1.13928	1.52256	1.33051
cds150	WP_029532030.1	Plasmid_A	ABC transporter substrate-binding protein	1.29492	2.46975	2.30903
cds159	WP_004674652.1	Plasmid_A	ABC transporter permease	1.00463	1.02181	<1
cds209	WP_010016978.1	Plasmid_A	carbohydrate ABC transporter permease	1.23049	1.16491	1.2275
cds210	WP_016737081.1	Plasmid_A	sugar ABC transporter permease	1.92427	2.38126	2.03502
cds229	WP_004674667.1	Plasmid_A	formaldehyde dehydrogenase%2C glutathione-independent	1.57674	1.73977	1.49841
cds250	WP_016737048.1	Plasmid_A	SMP-30/gluconolactonase/LRE family protein	1.08505	1.09546	<1
cds253	WP_016737045.1	Plasmid_A	2-hydroxyacid dehydrogenase	2.71408	2.66514	2.34969
cds254	WP_016737044.1	Plasmid_A	KR domain-containing protein	2.68859	2.42053	1.91163
cds255	WP_016737043.1	Plasmid_A	gluconokinase	2.19665	1.5321	1.58897
cds257	WP_016737041.1	Plasmid_A	sugar ABC transporter ATP-binding protein	2.00527	1.4773	<1
cds278	WP_016737023.1	Plasmid_A	FMN-dependent monooxygenase	1.20657	1.17884	1.21467
cds279	WP_004670822.1	Plasmid_A	IclR family transcriptional regulator	2.54081	2.63498	2.47828
cds280	WP_029532110.1	Plasmid_A	ABC transporter substrate-binding protein	2.4917	2.07614	1.9146
cds325	WP_016736977.1	Plasmid_A	hypothetical protein	1.8393	1.74089	1.9688
cds326	WP_004670929.1	Plasmid_A	30S ribosomal protein S21	1.34494	1.57235	1.60456
cds353	WP_016736659.1	Plasmid_B	potassium-transporting ATPase subunit KdpA	1.2641	1.0396	1.29917
cds372	WP_012490604.1	Plasmid_B	iron-hydroxamate transporter ATP-binding protein	1.03667	1.0186	<1
cds380	WP_004678031.1	Plasmid_B	DeoR/GlpR transcriptional regulator	2.46444	2.10907	1.84004
cds381	WP_016736680.1	Plasmid_B	bifunctional rhamnulose-1-phosphate aldolase/short-chain dehydrogenase	3.57224	1.68413	2.11065
cds397	WP_029531975.1	Plasmid_B	LysR family transcriptional regulator	1.19401	1.56248	1.34346
cds409	WP_016736701.1	Plasmid_B	bifunctional hydroxymethylpyrimidine kinase/phosphomethylpyrimidine kinase	1.75591	1.47636	1.18062
cds430	WP_029531978.1	Plasmid_B	hypothetical protein	4.89994	3.0902	3.54769
cds434	WP_029531980.1	Plasmid_B	membrane protein	1.59718	1.57111	1.38404
cds463	WP_039752254.1	Plasmid_B	2-deoxy-D-gluconate 3-dehydrogenase	1.44378	1.2618	1.32526
cds464	WP_016736741.1	Plasmid_B	5-dehydro-4-deoxy-D-glucuronate isomerase	1.62569	1.67102	1.4708
cds465	WP_004669789.1	Plasmid_B	DUF1127 domain-containing protein	2.82256	3.12825	3.26903
cds468	WP_016736744.1	Plasmid_B	aldo/keto reductase	1.34269	1.20521	1.09286
cds471	WP_029531995.1	Plasmid_B	septum formation inhibitor MinC	1.71339	1.13133	1.36689
cds472	WP_016736747.1	Plasmid_B	TetR/AcrR family transcriptional regulator	6.12689	6.00969	5.89404
cds473	WP_016736748.1	Plasmid_B	efflux RND transporter periplasmic adaptor subunit	6.65652	5.50259	5.71476
cds474	WP_046977157.1	Plasmid_B	AcrB/AcrD/AcrF family protein	4.15726	2.28181	2.80946
cds476	WP_016736751.1	Plasmid_B	hypothetical protein	2.30832	1.2758	1.48074
cds477	WP_012490702.1	Plasmid_B	oxidoreductase	6.51798	5.19523	5.36906
cds478	WP_012490703.1	Plasmid_B	formyltetrahydrofolate deformylase	3.64736	1.66849	2.01515
cds507	WP_012490730.1	Plasmid_B	nicotinate-nucleotide diphosphorylase (carboxylating)	1.56376	1.29156	1.32248
cds508	WP_016736774.1	Plasmid_B	L-aspartate oxidase	1.42989	1.8453	1.52107
cds521	WP_016736787.1	Plasmid_B	precorrin-2 C(20)-methyltransferase	1.39977	1.26171	1.26223
cds522	WP_016736788.1	Plasmid_B	precorrin-8X methylmutase	1.83736	1.65139	1.46526
cds566	WP_029531919.1	Plasmid_B	ubiquinol oxidase subunit II	1.81791	1.66786	1.5952
cds569	WP_016736513.1	Plasmid_B	hypothetical protein	1.89557	2.60503	2.08104
cds570	WP_016736514.1	Plasmid_B	type II toxin-antitoxin system RelE/ParE family toxin	1.60096	2.31293	1.95624
cds571	WP_016736515.1	Plasmid_B	hypothetical protein	1.34215	1.92915	1.90792
cds618	WP_016736554.1	Plasmid_B	N-formylglutamate deformylase	2.79356	2.01977	1.77655
cds619	WP_016736555.1	Plasmid_B	histidine ammonia-lyase	4.13943	3.06121	2.77989
cds620	WP_029531939.1	Plasmid_B	imidazolonepropionase	4.30604	3.98478	3.27061
cds621	WP_016736556.1	Plasmid_B	formimidoylglutamate deiminase	4.41317	3.29548	2.82287
cds622	WP_016736557.1	Plasmid_B	histidine utilization repressor	3.58617	2.57069	2.36553
cds623	WP_012490471.1	Plasmid_B	histidine utilization repressor	2.48539	2.10538	1.80165
cds624	WP_080956176.1	Plasmid_B	hypothetical protein	1.42003	1.28883	<1
cds625	WP_012490473.1	Plasmid_B	ABC transporter substrate-binding protein	3.17191	2.51091	1.9576
cds626	WP_016736558.1	Plasmid_B	ABC transporter permease	3.20126	2.4787	2.18195
cds627	WP_004674851.1	Plasmid_B	ABC transporter permease	2.68384	2.18909	1.90047
cds628	WP_012490476.1	Plasmid_B	histidine/lysine/arginine/ornithine ABC transporter ATP-binding protein HisP	1.90712	1.64847	1.45077
cds629	WP_016736559.1	Plasmid_B	histidine ammonia-lyase	1.49311	1.3156	1.15707
cds638	WP_016736567.1	Plasmid_B	periplasmic alpha-galactoside-binding protein	1.08311	1.11594	1.07983
cds689	WP_016736613.1	Plasmid_B	IclR family transcriptional regulator	1.33564	2.868	1.14449
cds785	WP_004671987.1	Plasmid_C	XRE family transcriptional regulator	3.0407	1.49512	1.78736
cds820	WP_016737490.1	Plasmid_C	hypothetical protein	1.94118	6.42978	6.02687
cds836	WP_011053466.1	Plasmid_C	hypothetical protein	2.10851	6.54065	5.95729
cds872	WP_004679687.1	Plasmid_C	nodulation protein A	1.38462	4.7588	4.54431
cds962	gbkey=CDS	Plasmid_C	hypothetical protein	1.15617	1.14665	1.15781
cds1006	WP_077991535.1	Plasmid_C	hypothetical protein; copper resistance protein CopC	1.25934	1.24626	1.28682
cds1007	WP_016737410.1	Plasmid_C	hypothetical protein; nucleotidyl transferase AbiEii/AbiGii toxin family	2.90462	2.83618	3.02167
cds1008	gbkey=CDS	Plasmid_C	hypothetical protein; nucleotidyl transferase AbiEii/AbiGii toxin	1.24894	1.78199	1.86196
cds1013	WP_008534237.1	Plasmid_C	hypothetical protein	1.74892	2.20089	1.94857
cds1014	WP_046977176.1	Plasmid_C	hypothetical protein	1.52843	1.879	1.75082
cds1015	WP_046977177.1	Plasmid_C	EscJ/YscJ/HrcJ family type III secretion inner membrane ring protein	2.52675	2.70715	2.48661
cds1016	WP_046977178.1	Plasmid_C	hypothetical protein	1.35641	1.30735	1.21536
cds1017	WP_046977179.1	Plasmid_C	HrpE/YscL family type III secretion apparatus protein	2.70079	2.46954	2.51928
cds1018	WP_046977180.1	Plasmid_C	FliI/YscN family ATPase	1.43255	1.25094	1.37661
cds1028	WP_009995183.1	Plasmid_C	hypothetical protein	1.09223	1.79516	1.60074
cds1032	WP_010031884.1	Plasmid_C	hypothetical protein	1.06563	1.51636	1.32776
cds1045	WP_011053340.1	Plasmid_C	NAD(P)-dependent oxidoreductase	1.35657	1.39707	1.15671
cds1064	WP_016737424.1	Plasmid_C	AraC family transcriptional regulator	1.19511	1.32797	1.05858
cds1076	WP_004671535.1	Plasmid_C	SDR family NAD(P)-dependent oxidoreductase	2.07033	1.13828	<1
cds1077	WP_008534378.1	Plasmid_C	flavin reductase	4.00821	1.59264	1.67266
cds1078	WP_008534380.1	Plasmid_C	4-carboxymuconolactone decarboxylase	3.88293	1.41512	1.7433
cds1088	WP_016737437.1	Plasmid_C	sugar ABC transporter substrate-binding protein	4.28453	2.0255	1.86482
cds1089	WP_039752580.1	Plasmid_C	sugar ABC transporter ATP-binding protein	3.06886	1.11105	1.31171
cds1196	WP_016735368.1	Plasmid_D	acyl-CoA thioesterase	1.53353	1.33233	1.12864
cds1210	WP_016735379.1	Plasmid_D	sugar kinase	2.52824	1.59907	1.39168
cds1211	WP_016735380.1	Plasmid_D	hypothetical protein	2.38942	1.58128	1.1246
cds1244	WP_016735412.1	Plasmid_D	TRAP transporter large permease	1.07484	1.43764	1.22459
cds1245	WP_016735413.1	Plasmid_D	L-idonate 5-dehydrogenase	1.53189	1.64999	1.6569
cds1317	WP_029531734.1	Plasmid_D	dihydrodipicolinate synthase family protein	2.54373	1.87544	1.68796
cds1347	WP_016735504.1	Plasmid_D	XRE family transcriptional regulator	1.68832	2.1078	1.47912
cds1369	WP_016735525.1	Plasmid_D	thiol reductant ABC exporter subunit CydD	1.49005	1.25675	1.23059
cds1370	WP_016735526.1	Plasmid_D	GbsR/MarR family transcriptional regulator	1.05793	1.13223	1.01332
cds1390	WP_029531741.1	Plasmid_D	gfo/Idh/MocA family oxidoreductase	3.63019	2.02284	1.3504
cds1391	WP_016735545.1	Plasmid_D	sugar phosphate isomerase/epimerase	3.51123	1.42922	1.28199
cds1404	WP_016735553.1	Plasmid_D	amidase	1.55189	1.67723	1.4374
cds1444	WP_016735584.1	Plasmid_D	hypothetical protein	1.31749	1.84746	1.82789
cds1461	WP_016735600.1	Plasmid_D	DNA-binding protein	3.12824	2.33597	2.58097
cds1462	WP_016735601.1	Plasmid_D	hypothetical protein	2.81563	2.77129	2.79552
cds1554	WP_029531769.1	Plasmid_D	ABC transporter permease	1.47133	1.09909	<1
cds1555	WP_016735681.1	Plasmid_D	ABC transporter substrate-binding protein	2.21657	1.18729	<1
cds1558	WP_016735684.1	Plasmid_D	alcohol dehydrogenase	3.52074	1.53454	1.29946
cds1565	WP_016735690.1	Plasmid_D	ABC transporter ATP-binding protein	1.40613	1.31143	1.53243
cds1566	WP_004673596.1	Plasmid_D	ABC transporter ATP-binding protein	2.20889	2.64781	2.42703
cds1567	WP_016735691.1	Plasmid_D	glycerol-3-phosphate dehydrogenase	1.793	3.26879	2.21261
cds1577	WP_016735699.1	Plasmid_D	EmrB/QacA family drug resistance transporter	3.89925	4.13503	3.95847
cds1578	WP_016735700.1	Plasmid_D	HlyD family secretion protein	4.92359	4.36392	5.27671
cds1579	WP_029531771.1	Plasmid_D	TetR/AcrR family transcriptional regulator	3.79473	3.63854	4.1987
cds1580	WP_016735702.1	Plasmid_D	mannonate dehydratase	1.7192	1.94717	1.84724
cds1603	WP_016735725.1	Plasmid_D	ABC transporter substrate-binding protein	5.47254	1.37711	2.10091
cds1658	WP_016735773.1	Plasmid_D	mandelate racemase/muconate lactonizing enzyme family protein	1.45761	1.35388	1.41794
cds1659	WP_016735774.1	Plasmid_D	ABC transporter ATP-binding protein	1.12921	1.12248	1.10533
cds1661	WP_016735776.1	Plasmid_D	ABC transporter permease	1.02609	1.1585	1.0403
cds1663	WP_012489932.1	Plasmid_D	FadR family transcriptional regulator	3.29354	2.39293	2.15414
cds1664	WP_016735778.1	Plasmid_D	NAD(P)-dependent oxidoreductase	2.04302	1.36637	1.28805
cds1665	WP_016735779.1	Plasmid_D	SMP-30/gluconolactonase/LRE family protein	1.6964	1.30788	1.26166
cds1718	WP_016735829.1	Plasmid_D	AcrB/AcrD/AcrF family protein	1.16714	1.18999	2.02565
cds1719	WP_016735830.1	Plasmid_D	efflux RND transporter periplasmic adaptor subunit	2.49951	3.06235	3.81486
cds1720	WP_016735831.1	Plasmid_D	efflux RND transporter periplasmic adaptor subunit	2.6829	3.94811	4.49173
cds1721	WP_029531790.1	Plasmid_D	TetR/AcrR family transcriptional regulator	1.12713	2.27927	2.47053
cds1722	WP_029531791.1	Plasmid_D	LacI family transcriptional regulator	1.26272	1.84869	1.61651
cds1731	WP_016735843.1	Plasmid_D	carbohydrate ABC transporter substrate-binding protein	1.01007	1.37406	2.188
cds1733	WP_016735844.1	Plasmid_D	DUF3422 domain-containing protein	1.62654	1.23031	1.42276
cds1740	WP_004677397.1	Plasmid_D	LacI family transcriptional regulator	1.1935	1.36199	1.07914
cds1743	WP_004677391.1	Plasmid_D	FadR family transcriptional regulator	2.03577	1.77155	1.7022
cds1749	WP_016735856.1	Plasmid_D	carbohydrate-binding protein	2.54214	1.25822	<1
cds1750	WP_016735857.1	Plasmid_D	heparinase	4.69416	3.41117	3.20406
cds1751	WP_016735858.1	Plasmid_D	sugar ABC transporter permease	4.85838	3.76132	3.42368
cds1752	WP_016735859.1	Plasmid_D	carbohydrate ABC transporter permease	3.29806	1.74245	1.74857
cds1753	WP_016735860.1	Plasmid_D	glucoronyl hydrolase	3.57378	2.28938	2.14511
cds1754	WP_016735861.1	Plasmid_D	ABC transporter ATP-binding protein	2.02858	1.07472	<1
cds1829	WP_016735926.1	Plasmid_D	oxidoreductase	1.37836	1.64692	1.78832
cds1856	WP_016735951.1	Plasmid_D	hypothetical protein	1.59872	1.18105	1.25253
cds1923	WP_016736009.1	Plasmid_D	amino acid ABC transporter ATP-binding protein	1.32969	1.73797	1.4673
cds1924	WP_004669259.1	Plasmid_D	amino acid ABC transporter permease	1.16277	1.79746	1.53707
cds1925	WP_016736010.1	Plasmid_D	amino acid ABC transporter permease	1.5289	2.066	1.94815
cds1934	WP_016736015.1	Plasmid_D	TetR/AcrR family transcriptional regulator	1.73071	1.32639	1.41276
cds2032	end_range=861851,.	Plasmid_D	hypothetical protein	1.39293	1.48017	1.50759
cds2033	WP_029531829.1	Plasmid_D	cold-shock protein	1.20726	1.29221	1.24544
cds2036	WP_016736098.1	Plasmid_D	hypothetical protein	2.65859	1.76111	2.13524
cds2037	WP_080956208.1	Plasmid_D	hypothetical protein	2.64017	2.04361	2.29116
cds2055	WP_016736110.1	Plasmid_D	curlin	2.13746	1.0852	1.67957
cds2061	WP_016737599.1	Plasmid_D	cold-shock protein	1.86194	1.47173	1.27965
cds2086	WP_080956210.1	Plasmid_D	TetR/AcrR family transcriptional regulator	1.88949	1.42552	1.43642
cds2107	WP_016736157.1	Plasmid_D	cold-shock protein	2.57288	1.94702	2.06855
cds2108	WP_016736158.1	Plasmid_D	hypothetical protein	2.35755	2.11491	2.07509
cds2109	WP_016736159.1	Plasmid_D	hypothetical protein	1.67452	1.17479	1.36934
cds2110	WP_016736160.1	Plasmid_D	hypothetical protein	1.95807	1.42234	1.67761
cds2195	WP_080956220.1	Plasmid_D	cysteine hydrolase	1.46459	1.10701	1.14427
cds2204	WP_016735300.1	Plasmid_D	ABC transporter substrate-binding protein	1.20374	1.32918	1.1255
cds2205	WP_016735301.1	Plasmid_D	ABC transporter ATP-binding protein	1.66593	2.00317	1.88275
cds2206	WP_016735302.1	Plasmid_D	ABC transporter ATP-binding protein	2.08013	2.05595	2.06689
cds2207	WP_016735303.1	Plasmid_D	branched-chain amino acid ABC transporter permease	1.32669	1.41145	1.47674
cds2209	WP_029531706.1	Plasmid_D	3-alpha-hydroxysteroid dehydrogenase	1.41699	1.35053	1.30314
cds2210	WP_016735306.1	Plasmid_D	salicylaldehyde dehydrogenase	1.28435	1.1711	1.0616
cds2242	WP_029531708.1	Plasmid_D	ribulose 1%2C5-bisphosphate carboxylase	2.74686	2.46036	1.67772
cds2243	WP_029531709.1	Plasmid_D	four-carbon acid sugar kinase family protein	1.92544	1.25405	1.21928
cds2244	WP_016735336.1	Plasmid_D	triose-phosphate isomerase	1.63207	1.79675	1.36047
cds2245	WP_004678734.1	Plasmid_D	ribose 5-phosphate isomerase B	2.1802	2.98399	2.33888
cds2246	WP_004678736.1	Plasmid_D	semialdehyde dehydrogenase	1.24386	1.75459	<1
cds2249	WP_004678740.1	Plasmid_D	sugar ABC transporter ATP-binding protein	1.06	1.01774	1.08543
cds2265	WP_029531713.1	Plasmid_D	sugar phosphate isomerase/epimerase	1.0744	1.20297	1.13466
cds2266	WP_016735351.1	Plasmid_D	ABC transporter ATP-binding protein	1.18555	1.34792	1.29995
cds2278	WP_080956221.1	Plasmid_D	hypothetical protein	1.19062	1.22995	1.0595
cds2366	WP_016734080.1	Chromosome	hypothetical protein	1.52915	1.35074	1.42998
cds2390	WP_009998001.1	Chromosome	30S ribosomal protein S9	4.08752	2.72042	2.97224
cds2391	WP_008521951.1	Chromosome	50S ribosomal protein L13	4.3662	3.38827	3.40426
cds2431	WP_016734044.1	Chromosome	NADH-quinone oxidoreductase subunit G	1.12649	1.10826	1.03373
cds2441	WP_016734037.1	Chromosome	methylmalonyl-CoA epimerase	1.00615	1.02823	<1
cds2442	WP_029531512.1	Chromosome	DUF1467 domain-containing protein	1.15757	1.16903	1.11938
cds2455	WP_003587245.1	Chromosome	50S ribosomal protein L33	3.3514	2.75835	2.85333
cds2463	WP_016734020.1	Chromosome	aspartate carbamoyltransferase	1.47828	1.58533	1.3577
cds2480	WP_003573826.1	Chromosome	preprotein translocase subunit SecE	2.01408	2.18273	2.08916
cds2481	WP_004669067.1	Chromosome	transcription termination/antitermination protein NusG	1.8054	1.86011	1.84303
cds2482	WP_004669070.1	Chromosome	50S ribosomal protein L11	1.95162	1.63978	1.79955
cds2483	WP_004669072.1	Chromosome	50S ribosomal protein L1	2.0566	1.51869	1.76867
cds2484	WP_037113092.1	Chromosome	50S ribosomal protein L10	1.44175	1.02116	1.34892
cds2489	WP_003547537.1	Chromosome	30S ribosomal protein S12	5.79303	5.04184	4.98186
cds2490	WP_004669085.1	Chromosome	30S ribosomal protein S7	5.46198	4.12091	4.42308
cds2491	WP_038688280.1	Chromosome	elongation factor G	4.40703	2.76625	3.2814
cds2493	WP_003547547.1	Chromosome	30S ribosomal protein S10	3.4461	2.9728	2.88474
cds2494	WP_016734008.1	Chromosome	50S ribosomal protein L3	3.14773	2.35292	2.51155
cds2495	WP_004674918.1	Chromosome	50S ribosomal protein L4	2.80394	1.91098	2.18879
cds2496	WP_003547550.1	Chromosome	50S ribosomal protein L23	2.70386	1.83365	2.14105
cds2497	WP_009986456.1	Chromosome	50S ribosomal protein L2	2.21818	1.56431	1.84368
cds2498	WP_003573797.1	Chromosome	30S ribosomal protein S19	1.56635	1.25679	1.45752
cds2499	WP_004674922.1	Chromosome	50S ribosomal protein L22	1.44089	1.19335	1.39897
cds2504	WP_003573790.1	Chromosome	50S ribosomal protein L14	4.32136	3.26937	3.54442
cds2505	WP_004674929.1	Chromosome	50S ribosomal protein L24	4.11612	2.69549	3.12562
cds2506	WP_016734007.1	Chromosome	50S ribosomal protein L5	3.54362	1.96699	2.44641
cds2507	WP_003573787.1	Chromosome	30S ribosomal protein S14	3.38739	1.83764	2.18058
cds2508	WP_003547562.1	Chromosome	30S ribosomal protein S8	2.84081	1.59574	1.80908
cds2509	WP_003578670.1	Chromosome	50S ribosomal protein L6	2.32917	1.40728	1.61782
cds2510	WP_003573785.1	Chromosome	50S ribosomal protein L18	1.85214	1.1714	1.35589
cds2511	WP_003573784.1	Chromosome	30S ribosomal protein S5	1.75886	1.00746	1.19293
cds2516	WP_003573772.1	Chromosome	30S ribosomal protein S13	3.53582	2.76321	2.81778
cds2517	WP_003547577.1	Chromosome	30S ribosomal protein S11	2.78029	1.80983	2.15644
cds2518	WP_003547579.1	Chromosome	DNA-directed RNA polymerase subunit alpha	2.39107	1.3715	1.87165
cds2570	WP_016732818.1	Chromosome	homogentisate 1%2C2-dioxygenase	1.11141	1.70733	1.2237
cds2571	WP_016732819.1	Chromosome	FAA hydrolase family protein	1.83822	1.80597	1.68763
cds2572	WP_016732820.1	Chromosome	maleylacetoacetate isomerase	1.5978	1.46397	1.52481
cds2573	WP_012483534.1	Chromosome	MEKHLA domain-containing protein	1.40307	1.36751	1.46692
cds2591	WP_012483551.1	Chromosome	3-oxoacyl-ACP reductase	5.70179	2.79768	3.54699
cds2592	WP_012483552.1	Chromosome	TetR/AcrR family transcriptional regulator	6.38751	4.54301	5.01542
cds2593	WP_012483553.1	Chromosome	FMN-dependent NADH-azoreductase	3.77782	1.35941	2.15422
cds2599	WP_016732838.1	Chromosome	alanine dehydrogenase	1.38532	2.22878	1.9364
cds2600	WP_016732839.1	Chromosome	DUF1203 domain-containing protein	2.25507	3.07124	2.69502
cds2618	WP_012483575.1	Chromosome	ANTAR domain-containing protein	1.47205	1.23721	1.19342
cds2646	WP_016732877.1	Chromosome	hypothetical protein	1.105	1.12928	<1
cds2655	WP_012483593.1	Chromosome	exodeoxyribonuclease III	1.14548	1.04648	1.04494
cds2671	WP_004678848.1	Chromosome	preprotein translocase subunit YajC	1.7463	1.33463	1.38798
cds2676	WP_016732903.1	Chromosome	FADH(2)-oxidizing methylenetetrahydrofolate--tRNA-(uracil(54)-C(5))-methyltransferase TrmFO	1.58453	1.51266	1.62086
cds2677	WP_004678841.1	Chromosome	DUF1127 domain-containing protein	1.76399	2.16675	2.32139
cds2678	WP_004678838.1	Chromosome	DUF1127 domain-containing protein	2.07086	2.4043	2.57895
cds2681	WP_004678834.1	Chromosome	trigger factor	2.8879	2.21531	2.34168
cds2705	WP_004671258.1	Chromosome	NADH:ubiquinone oxidoreductase subunit NDUFA12	1.10342	1.08107	1.00902
cds2758	WP_008526906.1	Chromosome	30S ribosomal protein S2	4.22089	2.8845	2.97086
cds2759	WP_009994369.1	Chromosome	elongation factor Ts	3.69324	1.89425	2.3181
cds2791	WP_016732968.1	Chromosome	bifunctional 2-C-methyl-D-erythritol 4-phosphate cytidylyltransferase/2-C-methyl-D-erythritol 2%2C4-cyclodiphosphate synthase	1.43066	1.27755	1.30454
cds2818	WP_029531170.1	Chromosome	uroporphyrinogen-III C-methyltransferase	1.11674	1.27893	1.20959
cds2820	WP_016732974.1	Chromosome	nitrite/sulfite reductase	1.04914	1.09323	1.04683
cds2823	WP_016732977.1	Chromosome	AEC family transporter	1.05726	1.29542	1.13817
cds2833	gbkey=CDS	Chromosome	LysR family transcriptional regulator	1.51623	1.41414	1.30347
cds2834	WP_016732989.1	Chromosome	ABC transporter ATP-binding protein	1.58139	1.16811	1.05129
cds2839	WP_016732994.1	Chromosome	hypothetical protein	1.64703	1.30793	1.29244
cds2841	WP_016732996.1	Chromosome	MarR family transcriptional regulator	1.20938	1.59235	1.89924
cds2844	WP_016732999.1	Chromosome	gfo/Idh/MocA family oxidoreductase	1.41851	1.55607	1.34542
cds2849	WP_046977064.1	Chromosome	ABC transporter ATP-binding protein	1.35509	1.31392	1.2058
cds2850	gbkey=CDS	Chromosome	5-dehydro-4-deoxyglucarate dehydratase	1.09742	2.21865	2.60845
cds2853	WP_016733006.1	Chromosome	ABC transporter substrate-binding protein	1.06589	1.863	2.29081
cds2854	WP_012483752.1	Chromosome	ABC transporter permease	1.44435	1.97183	2.11708
cds2880	WP_004673778.1	Chromosome	sugar ABC transporter substrate-binding protein	4.01246	2.93802	3.66003
cds2881	WP_020465354.1	Chromosome	sugar ABC transporter ATP-binding protein	3.4587	2.1188	3.33545
cds2886	WP_016733030.1	Chromosome	glutamine--fructose-6-phosphate transaminase (isomerizing)	2.09293	1.29749	1.62705
cds2889	WP_004680228.1	Chromosome	succinate dehydrogenase assembly factor 2 family protein	1.91718	1.72889	1.72817
cds2896	WP_004680220.1	Chromosome	invasion associated locus B family protein	1.40113	1.06418	1.03865
cds2907	WP_016733043.1	Chromosome	hypothetical protein	2.35134	1.57797	1.95319
cds2908	WP_004671912.1	Chromosome	pantetheine-phosphate adenylyltransferase	2.09926	1.98785	1.95153
cds2915	WP_016733047.1	Chromosome	beta-ketoacyl-[acyl-carrier-protein] synthase II	2.72977	1.12584	1.62176
cds2916	WP_029531198.1	Chromosome	transcriptional regulator	3.90114	3.26176	3.30442
cds2943	WP_016733074.1	Chromosome	agmatinase	2.11472	1.03618	2.23783
cds2959	WP_004671683.1	Chromosome	membrane protein	1.51382	1.5052	1.18248
cds2962	WP_016733090.1	Chromosome	methionine--tRNA ligase	1.25555	1.10309	1.00803
cds2985	WP_016733108.1	Chromosome	ATP-dependent helicase	3.28825	2.45119	2.59399
cds2989	WP_016733112.1	Chromosome	citrate synthase/methylcitrate synthase	3.57522	4.19042	4.06524
cds2990	WP_016733113.1	Chromosome	CTP synthase	1.37089	1.17589	1.14105
cds2991	WP_016733114.1	Chromosome	preprotein translocase subunit SecG	2.27769	2.09227	2.00481
cds2996	WP_004674119.1	Chromosome	hypothetical protein	2.34485	2.00724	1.909
cds3019	WP_016734499.1	Chromosome	SulP family inorganic anion transporter	1.38483	1.57343	1.39203
cds3020	WP_010058543.1	Chromosome	carbonic anhydrase	1.25662	1.64462	1.45523
cds3027	WP_016734492.1	Chromosome	cytochrome c	1.29529	1.18962	1.24882
cds3028	WP_016734491.1	Chromosome	LpqC%2C poly	1.66134	1.97232	2.11485
cds3071	WP_012483072.1	Chromosome	hypothetical protein	1.89183	1.07933	1.52435
cds3076	WP_046977107.1	Chromosome	betaine-aldehyde dehydrogenase	1.17855	1.3282	1.56955
cds3077	WP_012483077.1	Chromosome	transcriptional regulator BetI	1.34408	2.31353	2.16158
cds3084	WP_016734456.1	Chromosome	transcriptional regulator	1.44163	1.19627	1.00049
cds3112	WP_004676036.1	Chromosome	cold-shock protein	2.23829	1.68707	1.86367
cds3113	WP_016734430.1	Chromosome	hypothetical protein	2.24162	1.77091	1.90987
cds3114	WP_016734429.1	Chromosome	30S ribosomal protein S21	1.93466	1.27762	1.53393
cds3118	WP_029531569.1	Chromosome	MarR family transcriptional regulator	3.80202	1.10108	1.36626
cds3124	WP_016734422.1	Chromosome	ABC transporter ATP-binding protein	1.09727	1.28428	1.28036
cds3144	WP_029531567.1	Chromosome	glutathione S-transferase	2.27165	2.96709	2.53975
cds3145	WP_010025457.1	Chromosome	TetR/AcrR family transcriptional regulator	1.78053	2.90461	2.27939
cds3217	WP_016734352.1	Chromosome	DUF983 domain-containing protein	2.1934	2.4754	2.27604
cds3218	WP_016734351.1	Chromosome	LysR family transcriptional regulator	2.96226	3.1481	2.94846
cds3225	WP_016734345.1	Chromosome	MFS transporter	1.88678	1.44736	1.43777
cds3226	WP_004670343.1	Chromosome	hypothetical protein	1.94161	1.56595	1.62551
cds3230	WP_016734344.1	Chromosome	c-type cytochrome biogenesis protein CcmI	1.74992	1.08532	1.36515
cds3244	WP_010035016.1	Chromosome	hypothetical protein	3.04056	3.95613	3.9671
cds3254	WP_039751042.1	Chromosome	Lrp/AsnC family transcriptional regulator	1.8674	1.14472	1.42506
cds3265	WP_016734320.1	Chromosome	membrane protein	1.55536	1.55345	1.26024
cds3272	WP_010009317.1	Chromosome	hypothetical protein	1.67233	1.50673	1.71048
cds3299	WP_003574261.1	Chromosome	DNA-directed RNA polymerase subunit omega	1.79475	1.48947	1.42833
cds3301	WP_004675049.1	Chromosome	DUF3563 domain-containing protein	3.30459	4.42069	3.98549
cds3302	WP_012483260.1	Chromosome	DUF2062 domain-containing protein	2.20314	3.11754	2.74493
cds3312	WP_029531551.1	Chromosome	HD domain-containing protein	1.11479	1.36872	1.39033
cds3335	WP_016734272.1	Chromosome	hypothetical protein	2.02737	2.35649	2.24774
cds3341	WP_016734266.1	Chromosome	GFA family protein	1.26506	1.17773	1.34137
cds3342	WP_016734265.1	Chromosome	hypothetical protein	1.7425	1.12681	1.69601
cds3343	WP_016734264.1	Chromosome	cysteine--tRNA ligase	1.86734	1.81282	1.76004
cds3352	WP_016734256.1	Chromosome	50S ribosomal protein L9	2.29398	1.41256	1.66719
cds3354	WP_004680498.1	Chromosome	30S ribosomal protein S18	4.38892	2.6196	2.93145
cds3355	WP_004680499.1	Chromosome	30S ribosomal protein S6	4.7695	3.52312	3.44063
cds3358	WP_016734253.1	Chromosome	[acyl-carrier-protein] S-malonyltransferase	1.24028	1.07831	<1
cds3384	WP_029531544.1	Chromosome	ABC transporter ATP-binding protein	1.52916	1.09434	1.12338
cds3388	WP_004680549.1	Chromosome	nucleoside-diphosphate kinase	2.17396	1.75228	1.71593
cds3389	WP_016734230.1	Chromosome	hypothetical protein	3.01998	1.56595	1.91076
cds3390	WP_016734229.1	Chromosome	hypothetical protein	3.21625	2.36474	2.41866
cds3391	WP_046977115.1	Chromosome	branched-chain amino acid ABC transporter permease	2.04465	1.29259	1.45352
cds3401	WP_046977116.1	Chromosome	molybdopterin oxidoreductase family protein	1.02299	1.30388	1.14537
cds3402	WP_012483336.1	Chromosome	NUDIX domain-containing protein	1.06395	1.24023	1.13496
cds3403	WP_029531540.1	Chromosome	alpha-D-ribose 1-methylphosphonate 5-triphosphate diphosphatase	1.23212	1.08895	1.02633
cds3404	WP_016734217.1	Chromosome	phosphoribosylglycinamide formyltransferase	1.64809	1.40757	1.44495
cds3405	WP_016734216.1	Chromosome	phosphoribosylformylglycinamidine cyclo-ligase	2.11418	1.73921	1.54531
cds3409	WP_004673739.1	Chromosome	exopolyphosphatase	1.00217	1.01926	1.02166
cds3415	WP_029531536.1	Chromosome	aspartate--tRNA ligase	2.77544	2.16678	2.16966
cds3423	WP_016734203.1	Chromosome	EamA/RhaT family transporter	1.01341	1.48001	1.3707
cds3426	WP_016734201.1	Chromosome	porphobilinogen synthase	1.62059	1.33451	1.40933
cds3441	WP_012483354.1	Chromosome	serine hydroxymethyltransferase	1.46742	1.08983	1.05559
cds3458	WP_004674116.1	Chromosome	6%2C7-dimethyl-8-ribityllumazine synthase	1.6905	1.24007	1.23462
cds3484	WP_046977121.1	Chromosome	2-isopropylmalate synthase	2.08491	1.71779	1.78282
cds3527	WP_012484718.1	Chromosome	MarR family transcriptional regulator	1.2104	1.56181	1.66486
cds3529	WP_016733755.1	Chromosome	membrane protein	2.32926	2.02808	1.93895
cds3531	WP_016733756.1	Chromosome	polysaccharide deacetylase	1.26617	1.16277	1.1207
cds3534	WP_012484723.1	Chromosome	PadR family transcriptional regulator	4.31583	4.06168	4.22614
cds3535	WP_029531442.1	Chromosome	hypothetical protein	1.92775	1.60593	1.96305
cds3569	WP_016733789.1	Chromosome	5-methylaminomethyl-2-thiouridine methyltransferase	1.23101	1.17572	1.13842
cds3576	WP_029531450.1	Chromosome	RNA helicase	3.64637	2.50513	2.78069
cds3583	WP_012484826.1	Chromosome	dihydroxy-acid dehydratase	1.06564	1.1836	1.14315
cds3584	WP_016733800.1	Chromosome	aldehyde dehydrogenase family protein	1.05736	1.16767	1.09409
cds3591	WP_016733803.1	Chromosome	hypothetical protein	1.28775	1.31289	1.20354
cds3622	WP_011426430.1	Chromosome	UDP-glucose 4-epimerase	1.5083	1.69563	1.6492
cds3623	WP_016733829.1	Chromosome	glycosyl transferase	1.41656	1.71547	1.60806
cds3696	WP_012484941.1	Chromosome	hypothetical protein	1.71318	1.06974	<1
cds3708	WP_016733890.1	Chromosome	FAD-binding protein	1.09309	1.95721	1.70781
cds3709	WP_016733891.1	Chromosome	NAD-dependent dihydropyrimidine dehydrogenase subunit PreA	2.6265	3.17406	2.79641
cds3710	WP_080956157.1	Chromosome	hypothetical protein	3.02163	3.02248	2.87474
cds3737	WP_016733917.1	Chromosome	DUF559 domain-containing protein	1.63955	2.52221	2.14962
cds3738	WP_016733918.1	Chromosome	dihydropyrimidinase	2.67635	2.91088	2.67265
cds3740	WP_004673032.1	Chromosome	ABC transporter ATP-binding protein	1.93292	2.12548	2.05664
cds3741	WP_016733919.1	Chromosome	ABC transporter permease	1.0168	1.12533	1.13889
cds3767	WP_004675671.1	Chromosome	branched-chain amino acid ABC transporter substrate-binding protein	1.00628	1.3439	1.11433
cds3769	WP_037116131.1	Chromosome	ABC transporter ATP-binding protein	1.14705	1.58	1.44083
cds3787	WP_004675735.1	Chromosome	hypothetical protein	1.96872	1.9114	1.71964
cds3788	WP_029531492.1	Chromosome	RluA family pseudouridine synthase	1.45058	1.09635	1.06654
cds3789	WP_012484996.1	Chromosome	RNA polymerase sigma factor RpoH	1.0774	1.13628	<1
cds3796	WP_016733946.1	Chromosome	multidrug efflux RND transporter permease subunit	1.92683	1.09885	1.35197
cds3797	WP_004675748.1	Chromosome	MexE family multidrug efflux RND transporter periplasmic adaptor subunit	2.59997	1.79626	1.80035
cds3798	WP_029531493.1	Chromosome	alpha/beta hydrolase	2.68968	2.15633	2.21116
cds3805	WP_016733952.1	Chromosome	HlyD family secretion protein	3.52476	1.90659	2.63839
cds3806	WP_016733953.1	Chromosome	MarR family transcriptional regulator	4.04941	3.05045	3.24111
cds3823	WP_016733965.1	Chromosome	sugar ABC transporter permease	1.20314	1.5338	1.28619
cds3824	WP_011426608.1	Chromosome	carbohydrate ABC transporter permease	1.07818	1.08617	1.15469
cds3825	WP_016733966.1	Chromosome	SIS domain-containing protein	1.50229	1.12984	1.3571
cds3852	WP_016737122.1	Chromosome	phosphoribosyltransferase	1.0096	1.07683	1.11997
cds3856	WP_012485052.1	Chromosome	efflux RND transporter periplasmic adaptor subunit	1.55619	1.29367	1.33734
cds3857	WP_016737126.1	Chromosome	multidrug efflux RND transporter permease subunit	1.1209	1.10568	1.22133
cds3859	WP_016737128.1	Chromosome	LacI family transcriptional regulator	1.56416	1.56678	1.71735
cds3860	WP_016737129.1	Chromosome	ABC transporter substrate-binding protein	1.48834	1.28634	1.37804
cds3866	WP_016737135.1	Chromosome	amidohydrolase	1.53376	1.86429	1.64665
cds3867	WP_016737136.1	Chromosome	tripartite tricarboxylate transporter permease	2.45141	3.06981	2.82009
cds3868	WP_004672369.1	Chromosome	tripartite tricarboxylate transporter TctB family protein	1.0362	2.40105	2.10393
cds3894	WP_012485090.1	Chromosome	phosphoglucosamine mutase	1.92926	1.21127	1.4901
cds3904	WP_004671619.1	Chromosome	tol-pal system-associated acyl-CoA thioesterase	1.03554	1.07837	<1
cds3912	WP_012485106.1	Chromosome	YebC/PmpR family DNA-binding transcriptional regulator	1.60056	1.12578	1.12948
cds3946	WP_003566413.1	Chromosome	50S ribosomal protein L31	4.06275	3.23	3.2203
cds3954	WP_012485142.1	Chromosome	inositol monophosphatase	3.17617	2.81127	2.67637
cds3975	WP_010028538.1	Chromosome	DUF465 domain-containing protein	1.54631	1.67663	1.61019
cds3978	WP_003582204.1	Chromosome	50S ribosomal protein L36	3.08105	2.97782	2.73658
cds3992	WP_003585771.1	Chromosome	DUF2312 domain-containing protein	1.67509	1.70567	1.66395
cds4000	WP_016737223.1	Chromosome	homospermidine synthase	1.63719	1.2045	1.19107
cds4015	gbkey=CDS	Chromosome	hypothetical protein	3.57643	1.39236	3.24185
cds4016	WP_012484605.1	Chromosome	hypothetical protein	2.1768	1.61981	1.83184
cds4018	WP_012484607.1	Chromosome	carbamoyl-phosphate synthase small subunit	1.91608	1.55325	1.4583
cds4023	WP_012484610.1	Chromosome	MATE family efflux transporter	1.17875	1.12771	<1
cds4029	WP_016733674.1	Chromosome	carbamoyl-phosphate synthase large subunit	2.27922	1.85979	1.82521
cds4032	WP_004672775.1	Chromosome	transcription elongation factor GreA	1.77268	1.14387	1.24882
cds4033	WP_029531415.1	Chromosome	glycosyltransferase family 1 protein	1.37397	1.07183	1.21032
cds4034	WP_012484619.1	Chromosome	C4-dicarboxylate transporter	2.7036	3.06532	2.90595
cds4037	WP_029531418.1	Chromosome	Lrp/AsnC family transcriptional regulator	1.487	1.89315	1.55623
cds4040	WP_029531419.1	Chromosome	transcriptional regulator	2.90885	1.89854	2.24769
cds4049	WP_029531422.1	Chromosome	galactosyltransferase	1.90845	1.3009	1.56572
cds4050	WP_012484631.1	Chromosome	pyridoxal phosphate-dependent aminotransferase	1.34182	1.18304	1.08087
cds4076	WP_004680140.1	Chromosome	ribose-phosphate pyrophosphokinase	1.28951	1.43727	1.26425
cds4078	WP_012484653.1	Chromosome	50S ribosomal protein L25	1.5352	1.18354	1.12887
cds4084	WP_010031314.1	Chromosome	redox-regulated ATPase YchF	1.25349	1.05505	1.06239
cds4091	WP_012484665.1	Chromosome	ubiquinol-cytochrome c reductase iron-sulfur subunit	1.7665	1.29483	1.4596
cds4094	WP_012484668.1	Chromosome	CopG family transcriptional regulator	2.6356	1.10473	2.12912
cds4117	WP_016733591.1	Chromosome	50S ribosomal protein L11 methyltransferase	1.38776	1.1348	1.25875
cds4128	WP_004668803.1	Chromosome	UDP-3-O-acyl-N-acetylglucosamine deacetylase	2.50246	1.90157	2.29464
cds4162	WP_016733612.1	Chromosome	methylenetetrahydrofolate reductase [NAD(P)H]	2.19214	2.75983	2.40282
cds4172	WP_016733618.1	Chromosome	DUF4432 domain-containing protein	1.40339	1.34821	1.28544
cds4179	WP_016733622.1	Chromosome	N-formylglutamate amidohydrolase	1.92864	1.61196	1.53503
cds4185	WP_012484541.1	Chromosome	ABC transporter ATP-binding protein	2.96809	3.32883	3.12337
cds4186	WP_012484542.1	Chromosome	gfo/Idh/MocA family oxidoreductase	3.30854	3.77981	3.55121
cds4187	WP_012484543.1	Chromosome	carbohydrate ABC transporter permease	2.53928	2.96364	2.70764
cds4188	WP_016733625.1	Chromosome	sugar ABC transporter permease	2.09561	2.6481	2.38234
cds4189	WP_016733626.1	Chromosome	carbohydrate ABC transporter substrate-binding protein	2.4804	2.71918	2.56293
cds4190	WP_016733627.1	Chromosome	hypothetical protein	2.72758	2.97479	2.66187
cds4191	WP_016733628.1	Chromosome	N-acetylglucosamine kinase	2.75844	3.19303	2.81083
cds4192	WP_016733629.1	Chromosome	GntR family transcriptional regulator	1.9581	2.01844	1.86618
cds4195	WP_029531404.1	Chromosome	methionine synthase	2.64493	2.7521	2.51487
cds4216	WP_016733643.1	Chromosome	hypothetical protein	2.60391	2.36484	2.35217
cds4229	WP_029531410.1	Chromosome	YjbQ family protein	1.70762	1.02972	1.34866
cds4255	WP_016733518.1	Chromosome	PLP-dependent aminotransferase family protein	1.30647	1.56298	1.24441
cds4271	WP_016733533.1	Chromosome	ABC transporter permease	1.23544	1.04442	1.12732
cds4272	WP_039750664.1	Chromosome	glycerol-3-phosphate transporter permease	1.5413	1.86428	1.57601
cds4273	WP_016733534.1	Chromosome	ABC transporter substrate-binding protein	2.10908	2.10321	1.82817
cds4274	WP_016733535.1	Chromosome	sn-glycerol-3-phosphate import ATP-binding protein UgpC	2.20876	2.04842	1.76701
cds4275	WP_016733536.1	Chromosome	sugar-binding transcriptional regulator	1.59848	1.51188	1.32466
cds4282	WP_016733540.1	Chromosome	NAD(P)/FAD-dependent oxidoreductase	1.03601	1.22807	1.26269
cds4286	WP_016733543.1	Chromosome	aspartate/glutamate racemase family protein	2.32664	3.50075	2.10985
cds4287	WP_016733544.1	Chromosome	GNAT family N-acetyltransferase	4.32067	3.97879	3.64981
cds4288	WP_016733545.1	Chromosome	TetR/AcrR family transcriptional regulator	2.44511	1.99947	1.64123
cds4312	WP_016733560.1	Chromosome	acetolactate synthase 3 large subunit	2.45091	1.6127	1.65978
cds4381	WP_012484239.1	Chromosome	transcriptional regulator	3.26973	1.05556	1.24142
cds4403	WP_029531341.1	Chromosome	4-hydroxy-tetrahydrodipicolinate reductase	1.08645	1.22268	1.12724
cds4418	WP_010024558.1	Chromosome	hypothetical protein	2.78007	3.49985	3.29786
cds4419	WP_012484275.1	Chromosome	hypothetical protein	2.14956	2.51326	2.44076
cds4434	WP_029531346.1	Chromosome	metal-dependent hydrolase	1.25368	1.51724	1.42863
cds4514	WP_016733488.1	Chromosome	TetR/AcrR family transcriptional regulator	1.03804	1.03858	1.00133
cds4523	WP_046977141.1	Chromosome	hypothetical protein	2.17862	1.03632	1.02894
cds4526	WP_012484378.1	Chromosome	zinc ABC transporter permease	1.55714	1.40258	1.36951
cds4527	WP_016733499.1	Chromosome	metal ABC transporter ATP-binding protein	1.90394	2.06335	1.80679
cds4532	gbkey=CDS	Chromosome	cobaltochelatase subunit CobN	1.07161	1.36789	1.23426
cds4586	WP_004672825.1	Chromosome	membrane protein	1.35116	1.43307	1.284
cds4597	WP_004677801.1	Chromosome	glutamate synthase subunit beta	1.35422	1.26883	1.2609
cds4598	WP_016737236.1	Chromosome	glutamate synthase large subunit	1.81041	1.77475	1.63263
cds4601	WP_016737238.1	Chromosome	bile acid:sodium symporter	2.51132	2.12608	2.23755
cds4607	WP_020465417.1	Chromosome	hypothetical protein	2.48704	2.23614	2.12046
cds4627	WP_016737254.1	Chromosome	hypothetical protein	1.04332	1.11452	<1
cds4645	WP_003585885.1	Chromosome	30S ribosomal protein S21	2.50947	2.21832	2.08167
cds4676	WP_016737294.1	Chromosome	ketohydroxyglutarate aldolase	1.68849	1.26312	1.06423
cds4679	WP_029532244.1	Chromosome	rhodanese domain-containing protein	1.79424	1.68479	1.54211
cds4687	WP_016737300.1	Chromosome	sugar ABC transporter ATP-binding protein	1.83514	1.03753	<1
cds4692	WP_016737305.1	Chromosome	MFS transporter	1.72581	1.74956	1.80829
cds4693	WP_012485276.1	Chromosome	HlyD family secretion protein	1.54743	2.28809	1.91216
cds4695	WP_016737306.1	Chromosome	AraC family transcriptional regulator	1.08475	1.5717	1.49659
cds4702	WP_012485284.1	Chromosome	ABC transporter ATP-binding protein	3.27899	3.75668	3.34506
cds4703	WP_012485285.1	Chromosome	ABC transporter permease	2.44023	2.66294	2.54482
cds4704	WP_004678022.1	Chromosome	ABC transporter permease	1.84574	1.47212	1.71591
cds4715	WP_016737317.1	Chromosome	TetR/AcrR family transcriptional regulator	1.57964	1.58597	1.40862
cds4730	WP_016737327.1	Chromosome	AcrB/AcrD/AcrF family protein	1.99105	2.30303	2.10574
cds4731	WP_016737328.1	Chromosome	efflux RND transporter periplasmic adaptor subunit	2.01324	2.69069	2.45612
cds4737	WP_016737332.1	Chromosome	L-arabinose ABC transporter ATP-binding protein AraG	2.40251	1.9544	2.88216
cds4738	WP_016737333.1	Chromosome	arabinose ABC transporter substrate-binding protein	3.2114	3.57858	4.07042
cds4739	WP_029532271.1	Chromosome	FadR family transcriptional regulator	2.29906	3.29205	3.47101
cds4740	WP_016737335.1	Chromosome	galactonate dehydratase	1.81972	1.57307	2.29158
cds4753	WP_016737530.1	Chromosome	7-cyano-7-deazaguanine synthase QueC	2.18792	1.4943	1.54057
cds4784	WP_012485357.1	Chromosome	DUF4167 domain-containing protein	1.61296	1.89708	1.84251
cds4788	WP_004671807.1	Chromosome	aspartate kinase	2.1115	1.74822	1.77381
cds4807	WP_012485375.1	Chromosome	TetR/AcrR family transcriptional regulator	1.19087	1.23179	1.16885
cds4808	WP_012485376.1	Chromosome	MFS transporter	2.40506	1.18262	1.441
cds4827	WP_012485393.1	Chromosome	argininosuccinate lyase	1.92629	1.55415	1.53684
cds4832	WP_004671390.1	Chromosome	hypoxanthine phosphoribosyltransferase	1.40725	1.21416	1.15551
cds4849	WP_004679586.1	Chromosome	50S ribosomal protein L28	3.96154	3.32608	3.18762
cds4850	WP_016736456.1	Chromosome	membrane protein	4.03437	2.75148	2.793
cds4853	WP_016736453.1	Chromosome	cobaltochelatase subunit CobT	1.27771	1.14813	1.13889
cds4855	WP_004679597.1	Chromosome	molecular chaperone DnaJ	1.10274	1.1883	1.25737
cds4899	WP_016736406.1	Chromosome	LacI family transcriptional regulator	3.61489	2.0007	2.31806
cds4905	WP_016736403.1	Chromosome	arginase	3.41439	4.18222	3.86491
cds4906	WP_012485447.1	Chromosome	ornithine--oxo-acid transaminase	4.95327	5.86081	5.47067
cds4913	WP_016736400.1	Chromosome	formate dehydrogenase subunit beta	1.144	1.70036	1.35872
cds4929	WP_016736392.1	Chromosome	ATP synthase subunit alpha	1.99069	1.20993	1.41505
cds4930	WP_016736391.1	Chromosome	F0F1 ATP synthase subunit delta	2.39562	2.38582	2.19082
cds4942	WP_016736382.1	Chromosome	hypothetical protein	1.09949	1.30015	1.30229
cds4944	WP_016736380.1	Chromosome	dihydrolipoyllysine-residue succinyltransferase	1.21396	1.1438	1.06931
cds4946	WP_012485483.1	Chromosome	2-oxoglutarate dehydrogenase E1 component	1.28911	1.25339	1.2621
cds4947	WP_016736377.1	Chromosome	succinate--CoA ligase subunit alpha	1.3215	1.2756	1.22998
cds4976	WP_012485506.1	Chromosome	translational GTPase TypA	3.73592	2.85845	2.99146
cds4980	WP_016736350.1	Chromosome	NUDIX hydrolase	2.46234	1.28961	1.35973
cds4981	WP_016736349.1	Chromosome	hypothetical protein	6.42921	1.67925	2.82437
cds4987	WP_016736344.1	Chromosome	ABC transporter ATP-binding protein	1.5697	1.09952	1.25799
cds4988	WP_016736343.1	Chromosome	ABC transporter permease	1.5791	1.27804	1.29916
cds4989	WP_016736342.1	Chromosome	ABC transporter substrate-binding protein	2.3918	1.97733	1.65755
cds4990	WP_012485518.1	Chromosome	23S rRNA (adenine(2503)-C(2))-methyltransferase RlmN	2.24235	1.8281	1.89135
cds5008	WP_029531880.1	Chromosome	heme transporter HemC	1.85524	1.53693	1.48898
cds5009	WP_016736335.1	Chromosome	heme exporter protein CcmD	2.20746	1.52742	1.25648
cds5017	gbkey=CDS	Chromosome	hypothetical protein	2.75561	1.81153	1.78589
cds5023	WP_012485544.1	Chromosome	50S ribosomal protein L19	3.70246	3.03669	2.923
cds5026	WP_016736326.1	Chromosome	3-isopropylmalate dehydratase large subunit	2.15135	1.84465	1.97637
cds5059	WP_016736306.1	Chromosome	ABC transporter ATP-binding protein	1.04061	1.07845	1.08735
cds5083	WP_003543812.1	Chromosome	50S ribosomal protein L32	4.31771	3.62415	3.48082
cds5092	WP_011427210.1	Chromosome	ferredoxin family protein	1.95464	1.57677	1.71607
cds5096	WP_012485601.1	Chromosome	MFS transporter	1.67555	1.41222	<1
cds5098	WP_012485603.1	Chromosome	thiamine diphosphokinase	1.14961	1.39324	1.10465
cds5103	WP_012485607.1	Chromosome	GntR family transcriptional regulator	1.8291	1.98464	1.83153
cds5104	WP_016736281.1	Chromosome	SIS domain-containing protein	2.81199	2.92852	2.56589
cds5105	WP_016736280.1	Chromosome	N-acetylglucosamine-6-phosphate deacetylase	2.93067	2.8658	2.63337
cds5106	WP_016736279.1	Chromosome	sugar isomerase domain-containing protein	2.28079	2.04913	2.12006
cds5107	WP_016736278.1	Chromosome	FAD-binding oxidoreductase	1.47359	1.11373	1.31392
cds5112	WP_008528334.1	Chromosome	elongation factor P	2.62336	2.50045	2.35551
cds5113	WP_016736273.1	Chromosome	EF-P lysine aminoacylase GenX	1.19127	1.09236	1.00339
cds5128	WP_016736260.1	Chromosome	iron ABC transporter substrate-binding protein	1.92054	1.35325	1.23277
cds5129	WP_016736259.1	Chromosome	iron ABC transporter permease	2.0489	1.22244	1.37119
cds5134	WP_016736255.1	Chromosome	TetR/AcrR family transcriptional regulator	2.86914	1.89628	1.94338
cds5135	WP_016736254.1	Chromosome	50S ribosomal protein L21	2.63107	1.96574	1.94856
cds5136	WP_004676172.1	Chromosome	50S ribosomal protein L27	2.56432	1.62645	1.72439
cds5137	WP_012485632.1	Chromosome	N-acetyltransferase	1.99693	1.03705	1.10494
cds5158	WP_004675276.1	Chromosome	Zn-dependent protease	1.24031	1.25957	1.21995
cds5165	WP_010024973.1	Chromosome	3-isopropylmalate dehydrogenase	1.98503	1.13227	1.32193
cds5172	WP_029531858.1	Chromosome	hypothetical protein	2.07165	2.11725	2.10171
cds5173	WP_016736226.1	Chromosome	aspartate-semialdehyde dehydrogenase	2.03922	1.79939	1.91431
cds5187	WP_010019544.1	Chromosome	DUF1013 domain-containing protein	3.47293	2.97671	2.90465
cds5199	WP_008528706.1	Chromosome	transcription termination factor Rho	1.8447	1.30692	1.65004
cds5222	WP_016736193.1	Chromosome	phosphoribosylanthranilate isomerase	1.31043	1.19956	1.20865
cds5233	WP_016736183.1	Chromosome	adenosylhomocysteinase	2.62989	2.29224	2.11762
cds5250	WP_012482121.1	Chromosome	imidazoleglycerol-phosphate dehydratase	1.82818	1.65132	1.50353
cds5282	WP_039751506.1	Chromosome	gfo/Idh/MocA family oxidoreductase	1.1565	1.41033	1.27935
cds5295	WP_012482163.1	Chromosome	30S ribosomal protein S1	2.63604	1.4936	1.82786
cds5297	WP_012482165.1	Chromosome	TIGR02300 family protein	2.94099	2.00141	2.1744
cds5298	WP_012482166.1	Chromosome	excinuclease ABC subunit C	1.06007	1.0299	<1
cds5341	WP_016735158.1	Chromosome	class I SAM-dependent methyltransferase	2.21885	1.3918	1.69509
cds5342	WP_016735157.1	Chromosome	polyribonucleotide nucleotidyltransferase	1.81352	1.23646	1.45224
cds5343	WP_029531690.1	Chromosome	30S ribosomal protein S15	2.21563	1.54766	1.72944
cds5345	WP_016735154.1	Chromosome	tRNA pseudouridine(55) synthase TruB	2.1858	1.45709	1.84107
cds5346	WP_012482211.1	Chromosome	ribosome-binding factor A	2.16835	1.9538	1.97409
cds5355	WP_016733259.1	Chromosome	transketolase	2.04256	2.48961	1.99389
cds5356	WP_012484068.1	Chromosome	ABC transporter permease	1.94927	1.13808	1.44649
cds5383	WP_016733282.1	Chromosome	S-adenosylmethionine-dependent methyltransferase	1.5458	1.38905	1.19752
cds5401	WP_016733295.1	Chromosome	exopolysaccharide biosynthesis protein	1.11973	1.06979	<1
cds5404	WP_016733298.1	Chromosome	nicotinate-nucleotide--dimethylbenzimidazole phosphoribosyltransferase	1.94172	1.44987	1.57677
cds5412	WP_016733305.1	Chromosome	short chain dehydrogenase	1.55118	1.16194	1.27224
cds5413	WP_004678436.1	Chromosome	ABC transporter permease	1.35183	1.08038	1.10437
cds5414	WP_016733306.1	Chromosome	ABC transporter ATP-binding protein	2.0588	1.80623	1.83377
cds5449	WP_016733325.1	Chromosome	membrane protein	1.35313	1.43744	1.23944
cds5451	end_range=100646,.	Chromosome	cobaltochelatase subunit CobN	1.34504	1.35052	1.27533
cds5453	WP_016733208.1	Chromosome	DUF1062 domain-containing protein	1.25515	1.485	1.37462
cds5454	WP_008525884.1	Chromosome	RNA polymerase-binding protein DksA	1.4559	1.42747	1.41074
cds5483	WP_029531262.1	Chromosome	3-deoxy-7-phosphoheptulonate synthase	2.04328	1.37838	1.40191
cds5491	WP_016733231.1	Chromosome	ABC transporter ATP-binding protein	1.23055	1.47688	1.319
cds5492	WP_016733233.1	Chromosome	3-deoxy-7-phosphoheptulonate synthase class II	1.8006	1.34689	1.40594
cds5517	WP_016733120.1	Chromosome	N-acetyltransferase	1.07576	1.1208	1.01795
cds5564	WP_012483948.1	Chromosome	RluA family pseudouridine synthase	2.28388	2.069	2.02004
cds5568	WP_016733154.1	Chromosome	hypothetical protein	1.78038	1.44104	1.49071
cds5587	WP_004675609.1	Chromosome	tyrosine--tRNA ligase	2.30963	2.10058	2.02341
cds5594	WP_029531237.1	Chromosome	ATP-dependent helicase	1.87246	1.73861	1.69595
cds5606	WP_004676258.1	Chromosome	serine hydrolase family protein	1.32514	1.20566	1.17552
cds5614	WP_016733186.1	Chromosome	PLP-dependent aminotransferase family protein	2.66275	3.03856	2.75218
cds5618	WP_012483988.1	Chromosome	hypothetical protein	1.03264	1.08678	1.03375
cds5621	WP_012483991.1	Chromosome	Bcr/CflA family drug resistance efflux transporter	1.83499	1.02465	1.34563
cds5626	WP_012483995.1	Chromosome	tRNA 2-thiocytidine(32) synthetase TtcA	1.26486	1.04084	1.06757
cds5627	WP_010024905.1	Chromosome	glutaminase	3.01116	1.61001	1.92271
cds5628	WP_004676212.1	Chromosome	30S ribosomal protein S4	4.26309	3.0028	3.17963
cds5646	gbkey=CDS	Chromosome	translation initiation factor IF-2	2.29572	1.26755	1.50833
cds5647	WP_004673396.1	Chromosome	DNA-binding protein	2.34493	1.10215	1.63081
cds5648	WP_004673395.1	Chromosome	transcription termination/antitermination protein NusA	2.99246	1.9307	2.41668
cds5649	WP_004673394.1	Chromosome	ribosome maturation factor RimP	3.31552	2.98342	3.05886
cds5659	end_range=11518,.	Chromosome	SAM-dependent methyltransferase	1.2229	1.06843	<1
cds5667	WP_004672641.1	Chromosome	cytochrome c family protein	1.64495	1.01433	1.17231
cds5703	WP_004673514.1	Chromosome	carbon-phosphorus lyase complex subunit PhnJ	1.50097	1.19301	1.31479
cds5704	WP_016735120.1	Chromosome	carbon-phosphorus lyase complex subunit PhnI	2.07357	1.78469	1.88254
cds5705	WP_016735119.1	Chromosome	phosphonate C-P lyase system protein PhnH	1.18634	1.16917	1.19262
cds5706	WP_016735118.1	Chromosome	phosphonate C-P lyase system protein PhnG	2.54194	2.85138	2.69347
cds5707	WP_016735117.1	Chromosome	phosphonate metabolism transcriptional regulator PhnF	2.06975	2.23941	1.86246
cds5710	WP_004673526.1	Chromosome	ABC transporter ATP-binding protein	1.73748	1.37481	1.36345
cds5732	WP_004673564.1	Chromosome	deoxyribose-phosphate aldolase	1.04212	1.13646	1.13341
cds5747	WP_004668690.1	Chromosome	CpaF family protein	1.10305	1.4959	1.27792
cds5776	WP_016735074.1	Chromosome	elongation factor 4	2.09122	1.5614	1.54531
cds5778	WP_016735072.1	Chromosome	XRE family transcriptional regulator	4.28733	1.34258	2.13781
cds5789	WP_003570998.1	Chromosome	50S ribosomal protein L35	4.0465	3.19597	3.11754
cds5790	WP_004673860.1	Chromosome	50S ribosomal protein L20	3.96442	2.69529	2.89411
cds5791	WP_016735064.1	Chromosome	phenylalanine--tRNA ligase subunit alpha	2.33641	1.66031	1.89128
cds5825	WP_016735033.1	Chromosome	GMP synthase (glutamine-hydrolyzing)	1.88643	1.32552	1.46205
cds5858	WP_016735006.1	Chromosome	peptide chain release factor 3	2.73908	1.90962	2.19947
cds5864	WP_016735000.1	Chromosome	MFS transporter	1.45791	1.41356	1.30504
cds5865	WP_016734999.1	Chromosome	FadR family transcriptional regulator	1.93374	1.19266	1.21979
cds5882	WP_008524652.1	Chromosome	30S ribosomal protein S20	3.98435	3.6617	3.46013
cds5895	WP_012482410.1	Chromosome	methionine adenosyltransferase	3.53989	2.93917	2.84
cds5908	WP_004679829.1	Chromosome	tryptophan--tRNA ligase	2.07223	1.75088	1.65121
cds5938	WP_029531659.1	Chromosome	peptide deformylase	2.44462	2.21985	2.06509
cds5953	WP_012482454.1	Chromosome	acetylglutamate kinase	2.04761	1.72392	1.6909
cds5958	WP_010017635.1	Chromosome	hypothetical protein	1.69054	1.33674	1.40528
cds5959	WP_012482459.1	Chromosome	hypothetical protein	1.77822	1.66872	1.64891
cds5960	WP_016737600.1	Chromosome	cold-shock protein	1.3611	1.08304	1.1737
cds5963	WP_004673114.1	Chromosome	ribonuclease P protein component	2.25583	2.17147	2.16113
cds5964	WP_008524438.1	Chromosome	50S ribosomal protein L34	2.71305	1.85545	1.99082
cds5967	gbkey=CDS	Chromosome	nuclease	1.79004	1.66892	1.73738
cds5971	WP_029531653.1	Chromosome	hypothetical protein	1.54355	1.14585	1.14408
cds5982	WP_016734916.1	Chromosome	nuclear transport factor 2 family protein	1.35235	1.67136	1.70242
cds5983	WP_010024680.1	Chromosome	TetR/AcrR family transcriptional regulator	2.00078	3.2046	2.62285
cds5988	WP_016734910.1	Chromosome	NADP-dependent oxidoreductase	2.88569	1.84203	1.87716
cds5989	WP_016734909.1	Chromosome	TetR/AcrR family transcriptional regulator	1.88338	1.46534	1.23431
cds5992	WP_016734907.1	Chromosome	ROK family transcriptional regulator	1.43771	2.13631	2.10606
cds5993	WP_016734906.1	Chromosome	sugar ABC transporter substrate-binding protein	1.02416	1.56833	1.41424
cds6000	WP_012482521.1	Chromosome	DUF1772 domain-containing protein	1.03114	2.01107	1.86959
cds6044	WP_012482562.1	Chromosome	Hsp33 family molecular chaperone	2.42907	1.40624	1.72341
cds6047	WP_012482564.1	Chromosome	O-succinylhomoserine sulfhydrylase	1.48295	1.06398	1.12999
cds6064	WP_016734859.1	Chromosome	YitT family protein	2.81273	2.94748	2.25998
cds6081	WP_004675957.1	Chromosome	cold-shock protein	2.44236	1.7249	1.95654
cds6083	WP_010010011.1	Chromosome	GFA family protein	4.32795	1.10011	1.44759
cds6089	WP_016734842.1	Chromosome	pyridoxal phosphate-dependent aminotransferase	1.44928	1.4337	1.14604
cds6106	WP_003545338.1	Chromosome	translation initiation factor IF-1	1.46482	1.39675	1.43649
cds6135	WP_012482641.1	Chromosome	sugar ABC transporter substrate-binding protein	1.39277	2.16911	1.70897
cds6136	WP_016734810.1	Chromosome	sugar ABC transporter ATP-binding protein	3.18	3.85826	3.36533
cds6137	WP_016734809.1	Chromosome	ABC transporter permease	3.13773	3.03902	2.96327
cds6156	WP_016734797.1	Chromosome	protein translocase subunit SecDF	2.08644	1.97425	1.88109
cds6230	WP_016734759.1	Chromosome	phosphogluconate dehydratase	1.24629	1.11342	1.17723
cds6232	WP_004673775.1	Chromosome	glucose-6-phosphate dehydrogenase	1.45085	2.24339	1.91278
cds6249	WP_016734743.1	Chromosome	PAS domain-containing sensor histidine kinase	1.56431	1.60425	1.48034
cds6250	WP_012482731.1	Chromosome	phasin	4.06992	3.91968	4.18075
cds6260	WP_012482735.1	Chromosome	dipeptide ABC transporter permease DppC	1.12914	1.39582	1.28007
cds6261	WP_016734733.1	Chromosome	ABC transporter ATP-binding protein dppD	1.54145	1.713	1.60289
cds6262	WP_004676185.1	Chromosome	ABC transporter ATP-binding protein dppF	1.18269	1.35141	1.19803
cds6297	WP_012482792.1	Chromosome	IMP dehydrogenase	2.94835	2.23105	2.28478
cds6308	WP_016734693.1	Chromosome	inorganic phosphate transporter	1.18393	1.50214	1.30243
cds6312	WP_016734689.1	Chromosome	glycolate oxidase subunit GlcE	1.06417	1.19793	1.08775
cds6325	WP_029531624.1	Chromosome	histidine--tRNA ligase	1.86313	1.31995	1.38853
cds6337	WP_029531621.1	Chromosome	isoleucine--tRNA ligase	2.08599	1.50629	1.67146
cds6369	WP_004675822.1	Chromosome	F0F1 ATP synthase assembly protein	2.11997	1.85194	2.05033
cds6370	WP_010004512.1	Chromosome	ATP synthase subunit A	1.80271	1.64	1.66531
cds6375	WP_016734649.1	Chromosome	radical SAM protein	1.55888	1.15344	1.22994
cds6376	WP_016734648.1	Chromosome	glycosyl transferase	1.63645	1.41564	1.36103
cds6382	WP_004672609.1	Chromosome	DUF2007 domain-containing protein	2.0947	2.14311	2.03455
cds6383	WP_016734642.1	Chromosome	methyltransferase domain-containing protein	3.93161	4.65282	4.32949
cds6384	WP_016734641.1	Chromosome	divalent metal cation transporter	3.98744	5.01512	4.76489
cds6394	WP_016734634.1	Chromosome	phosphoribosylamine--glycine ligase	1.32952	1.19662	1.03256
cds6406	WP_029531614.1	Chromosome	threonylcarbamoyl-AMP synthase	1.51708	1.16554	1.13879
cds6416	WP_016734618.1	Chromosome	oxidoreductase	7.85858	1.53008	3.33623
cds6417	WP_016734617.1	Chromosome	transcriptional regulator	4.14215	1.53299	1.91567
cds6419	WP_029531612.1	Chromosome	TlyA family rRNA (cytidine-2'-O)-methyltransferase	1.75623	1.23234	1.04857
cds6429	WP_016734606.1	Chromosome	MCD%2C Malonyl-CoA decarboxylase MCD	1.39989	2.37997	1.94304
cds6443	WP_016734594.1	Chromosome	ABC transporter ATP-binding protein	1.54281	1.27286	1.15969
cds6450	WP_012482921.1	Chromosome	histidine phosphatase family protein	2.14562	1.57239	1.77492
cds6451	WP_016734590.1	Chromosome	enoyl-[acyl-carrier-protein] reductase FabI	2.57246	2.04413	2.16345
cds6481	WP_016734570.1	Chromosome	ABC transporter ATP-binding protein	1.48523	1.61761	1.41008
cds6482	WP_010021814.1	Chromosome	metal ABC transporter permease	1.3662	1.40628	1.34144
cds6489	WP_016734566.1	Chromosome	threonine synthase	1.56066	1.41867	1.37308
cds6491	WP_016734564.1	Chromosome	haloacid dehalogenase	1.97414	2.09787	1.82744
cds6507	WP_016734549.1	Chromosome	fucose-binding protein	1.13594	1.24874	1.02891
cds6508	WP_016734548.1	Chromosome	LacI family transcriptional regulator	1.60287	1.49776	1.31964

## Sheet: TableS5
Supplementary table S5. Up-regulated genes of R. phaseoli Ch24-10 in milpa exudates compared to Ch24-10 in bean exudates
ORF	Product	logFC
cds245	peptide ABC transporter substrate-binding protein	1.44462
cds268	histidine/lysine/arginine/ornithine ABC transporter ATP-binding protein HisP	1.41095
cds269	amino acid ABC transporter	1.28422
cds637	alpha-glucosidase/alpha-galactosidase	1.20546
cds1428	flotillin family protein	1.01926
cds1728	polygalacturonase	1.0895
cds1729	glycosyl hydrolase	1.26623
cds1832	DUF1236 domain-containing protein	1.32498
cds1905	BON domain-containing protein	1.57549
cds2199	crotonase	1.48726
cds2200	feruloyl-CoA synthetase	2.25055
cds2561	DUF1236 domain-containing protein	1.10807
cds2881	sugar ABC transporter ATP-binding protein	1.21593
cds2943	agmatinase	1.19964
cds2978	hypothetical protein	1.34938
cds3055	DegQ family serine endoprotease	1.91593
cds3235	PDZ domain-containing protein	2.75349
cds3236	DNA-binding response regulator	2.36832
cds3237	sensor histidine kinase	1.8545
cds3248	efflux RND transporter periplasmic adaptor subunit	1.26519
cds3457	hypothetical protein	2.15965
cds3571	hypothetical protein	1.15926
cds3572	MFS transporter	2.33899
cds3573	dihydrodipicolinate synthase family protein	7.83167
cds3574	LacI family DNA-binding transcriptional regulator	1.67831
cds4015	hypothetical protein	1.85254
cds4065	DUF1236 domain-containing protein	1.0618
cds4094	CopG family transcriptional regulator	1.02195
cds4340	efflux RND transporter periplasmic adaptor subunit	1.04137
cds4414	protocatechuate 3%2C4-dioxygenase	1.57403
cds4466	hypothetical protein	1.64986
cds4529	GTP-binding protein	2.89386
cds4530	hypothetical protein	3.09924
cds4531	membrane protein	2.49858
cds4572	DUF1442 domain-containing protein	1.6321
cds4585	DUF1800 domain-containing protein	1.66707
cds4939	cytochrome b	1.56139
cds4981	hypothetical protein	1.14481
cds5089	DUF3309 domain-containing protein	1.08125
cds5278	TetR/AcrR family transcriptional regulator	1.14645
cds5947	calcium-binding protein	3.76658
cds6416	oxidoreductase	1.80302

## Sheet: TableS6
Supplementary table S6. Up-regulated genes of R. phaseoli Ch24-10 in milpa exudates compared to Ch24-10 in maize exudates
ORF	Product	logFC
cds152	ABC transporter permease	1.04873
cds509	quinolinate synthase NadA	1.16766
cds820	hypothetical protein	4.04458
cds821	nodulation protein	2.81337
cds822	hypothetical protein	1.45673
cds827	hypothetical protein	3.5305
cds828	LysR family transcriptional regulator	1.03047
cds829	cupin domain-containing protein	1.40365
cds830	nodulation protein NodJ	1.59836
cds831	nodulation factor ABC transporter ATP-binding protein NodI	2.12792
cds832	hypothetical protein	2.41879
cds833	methyltransferase domain-containing protein	2.53379
cds834	chitooligosaccharide synthase NodC	2.80967
cds835	chitooligosaccharide deacetylase NodB	3.48194
cds836	hypothetical protein	3.80998
cds838	nodulation protein NodZ	2.25393
cds839	hypothetical protein	1.01641
cds872	nodulation protein A	3.12107
cds886	LLM class flavin-dependent oxidoreductase	1.54442
cds997	hypothetical protein	1.05274
cds998	hypothetical protein	1.01958
cds1424	PIN domain-containing protein	1.04014
cds1719	efflux RND transporter periplasmic adaptor subunit	1.27761
cds1720	efflux RND transporter periplasmic adaptor subunit	1.77141
cds1721	TetR/AcrR family transcriptional regulator	1.31202
cds1728	polygalacturonase	1.13928
cds1731	carbohydrate ABC transporter substrate-binding protein	1.14324
cds1891	TetR/AcrR family transcriptional regulator	1.44878
cds1997	hypothetical protein	1.02318
cds1998	hypothetical protein	1.24298
cds2850	5-dehydro-4-deoxyglucarate dehydratase	1.4737
cds2851	mannonate dehydratase	1.84242
cds2852	FadR family transcriptional regulator	1.12332
cds2853	ABC transporter substrate-binding protein	1.18635
cds2868	GFA family protein	1.1851
cds3868	tripartite tricarboxylate transporter TctB family protein	1.03237
cds4739	FadR family transcriptional regulator	1.13945
cds5037	nitrogen regulatory protein P-II 1	1.07447
